# Supplementary material for: Taste shaped the use of botanical drugs
Source: bioRxiv preprint, doi:10.1101/2023.07.18.549469, version 2 (2023-11-21)
Supplement: Supplementary Table 1 [file 549469_file06.xlsx]

## Sheet: SF1_Sampled_drugs_use_Matthioli
Chapter Matthioli 1568	Plant family	Taxon ID	Taxon panel	Collection number	Plant part	Quote Italian	Quote English Translation	Mode application	Therapeutic use
III_017	Acanthaceae Juss.	Acanthus mollis	Acanthus mollis L.	553	SUBT	corpo (ristagnare)	diarrhoea (to check)	INT	GA.DI
III_018	Acanthaceae Juss.	Acanthus mollis	Acanthus mollis L.	553	SUBT	corpo (ristagnare)	diarrhoea (to check)	INT	GA.DI
III_017	Acanthaceae Juss.	Acanthus mollis	Acanthus mollis L.	553	SUBT	membri smossi	joint dislocations	EXT	MU.EX
III_018	Acanthaceae Juss.	Acanthus mollis	Acanthus mollis L.	553	SUBT	membri smossi	joint dislocations	EXT	MU.EX
III_017	Acanthaceae Juss.	Acanthus mollis	Acanthus mollis L.	553	SUBT	rotti e spasimati; à i	for the ruptured and the spastics	INT	MU.IN
III_018	Acanthaceae Juss.	Acanthus mollis	Acanthus mollis L.	553	SUBT	rotti e spasimati; à i	for the ruptured and the spastics	INT	MU.IN
III_018	Acanthaceae Juss.	Acanthus mollis	Acanthus mollis L.	553	SUBT	thisici	tuberculosis	INT	RE.OT
III_017	Acanthaceae Juss.	Acanthus mollis	Acanthus mollis L.	553	SUBT	thisici	tuberculosis	INT	RE.OT
III_017	Acanthaceae Juss.	Acanthus mollis	Acanthus mollis L.	553	SUBT	cotture del fuoco	burns	EXT	SK.IN
III_018	Acanthaceae Juss.	Acanthus mollis	Acanthus mollis L.	553	SUBT	cotture del fuoco	burns	EXT	SK.IN
III_017	Acanthaceae Juss.	Acanthus mollis	Acanthus mollis L.	553	SUBT	orina (provocare)	diuretic	INT	UR.DI
III_018	Acanthaceae Juss.	Acanthus mollis	Acanthus mollis L.	553	SUBT	orina (provocare)	diuretic	INT	UR.DI
IV_061	Asteraceae Bercht. & J.Presl	Achillea ageratum	Achillea ageratum L.	404	HERB	madrice; durezze della (mollificare)	uterine indurations (to soften)	FUMI	GY.UT
IV_061	Asteraceae Bercht. & J.Presl	Achillea ageratum	Achillea ageratum L.	404	HERB	orina (provocare)	diuretic	FUMI	UR.DI
III_126	Asteraceae Bercht. & J.Presl	Achillea maritima	Achillea maritima (L.) Ehrend. & Y.P.Guo	334	HERB	disenteria	dysentery	INT	GA.DI
IV_038	Asteraceae Bercht. & J.Presl	Achillea millefolium	Achillea millefolium L.	570	FLOW	disenteria	dysentery	INT	GA.DI
IV_038	Asteraceae Bercht. & J.Presl	Achillea millefolium	Achillea millefolium L.	570	FLOW	madrice; flusso della	uterine discharge	EXT	GY.VD
IV_038	Asteraceae Bercht. & J.Presl	Achillea millefolium	Achillea millefolium L.	570	FLOW	mestrui (ristagnare)	menstrual bleeding (to staunch)	EXT	GY.VD
IV_038	Asteraceae Bercht. & J.Presl	Achillea millefolium	Achillea millefolium L.	570	FLOW	mestrui (ristagnare)	menstrual bleeding (to staunch)	CLY	GY.VD
IV_038	Asteraceae Bercht. & J.Presl	Achillea millefolium	Achillea millefolium L.	570	FLOW	infiammagioni delle ferite	inflamed wounds	EXT	SK.IF
IV_038	Asteraceae Bercht. & J.Presl	Achillea millefolium	Achillea millefolium L.	570	FLOW	ferite fresche (saldare)	fresh wounds (to close)	EXT	SK.WO
IV_105	Asteraceae Bercht. & J.Presl	Achillea millefolium	Achillea millefolium L.	390	HERB	fistole	fistula	EXT	SK.IF
IV_105	Asteraceae Bercht. & J.Presl	Achillea millefolium	Achillea millefolium L.	390	HERB	ulcere vecchie & nuove	old & new ulcers	EXT	SK.UL
IV_105	Asteraceae Bercht. & J.Presl	Achillea millefolium	Achillea millefolium L.	390	HERB	flusso del sangue; al	bleedings	EXT	SK.WO
II_151	Asteraceae Bercht. & J.Presl	Achillea ptarmica	Achillea ptarmica L.	713	FLOW	lividi (togliere)	bruises (to remove)	EXT	MU.EX
II_151	Asteraceae Bercht. & J.Presl	Achillea ptarmica	Achillea ptarmica L.	714	LEAF	lividi (togliere)	bruises (to remove)	EXT	MU.EX
IV_080	Ranunculaceae Juss.	Aconitum sp.	Aconitum napellus L.	593	SUBT	ammazzare lupi	to kill wolves	INT	POIS
I_002	Acoraceae Martinov	Acorus calamus	Acorus calamus L.	1	SUBT	antidoti	antidote	INT	ANTI
I_002	Acoraceae Martinov	Acorus calamus	Acorus calamus L.	1	SUBT	serpenti; morsure de	snake bites	INT	ANTI
I_002	Acoraceae Martinov	Acorus calamus	Acorus calamus L.	1	SUBT	occhi; impedimenti, che offuscano la chiarezza de gli (togliere)	visual impairments (to remove)	EXT	EYES
I_002	Acoraceae Martinov	Acorus calamus	Acorus calamus L.	1	SUBT	corpo; dolori di	abdominal pain	INT	GA.FU
I_002	Acoraceae Martinov	Acorus calamus	Acorus calamus L.	1	SUBT	fegato	liver	INT	GA.LI
I_002	Acoraceae Martinov	Acorus calamus	Acorus calamus L.	1	SUBT	madrice; alle malattie della	diseases of the uterus	EXT	GY.UT
I_002	Acoraceae Martinov	Acorus calamus	Acorus calamus L.	1	SUBT	rotti e spasimati; à i	for the ruptured and the spastics	INT	MU.IN
I_002	Acoraceae Martinov	Acorus calamus	Acorus calamus L.	1	SUBT	coste; dolori delle	side stitch	INT	NS.PA
I_002	Acoraceae Martinov	Acorus calamus	Acorus calamus L.	1	SUBT	petto; dolore del	chest pain	INT	RE.OT
I_002	Acoraceae Martinov	Acorus calamus	Acorus calamus L.	1	SUBT	milza (sminuire)	spleen (to reduce)	INT	SPLE
I_002	Acoraceae Martinov	Acorus calamus	Acorus calamus L.	1	SUBT	orina (provocare)	diuretic	INT	UR.DI
I_002	Acoraceae Martinov	Acorus calamus	Acorus calamus L.	1	SUBT	à coloro, che à gocciola à gocciola orinano	difficult urination (to facilitate)	INT	UR.OT
IV_138	Pteridaceae E.D.M.Kirchn.	Adiantum capillus-veneris	Adiantum capillus-veneris L.	454	HERB	serpenti; morsi delle	snake bites	INT	ANTI
IV_138	Pteridaceae E.D.M.Kirchn.	Adiantum capillus-veneris	Adiantum capillus-veneris L.	454	HERB	corpo (ristagnare)	diarrhoea (to check)	INT	GA.DI
IV_138	Pteridaceae E.D.M.Kirchn.	Adiantum capillus-veneris	Adiantum capillus-veneris L.	454	HERB	trabocco di fiele	Overflow of bile (jaundice)	INT	GA.LI
IV_138	Pteridaceae E.D.M.Kirchn.	Adiantum capillus-veneris	Adiantum capillus-veneris L.	454	HERB	mestrui (provocare)	menstruation (to induce)	INT	GY.AE
IV_138	Pteridaceae E.D.M.Kirchn.	Adiantum capillus-veneris	Adiantum capillus-veneris L.	454	HERB	secondine (provocare)	placenta (to promote expulsion)	INT	GY.AE
IV_138	Pteridaceae E.D.M.Kirchn.	Adiantum capillus-veneris	Adiantum capillus-veneris L.	454	HERB	petto; stretti di	dyspnoea	INT	RE.BD
IV_138	Pteridaceae E.D.M.Kirchn.	Adiantum capillus-veneris	Adiantum capillus-veneris L.	454	HERB	respirano; à coloro che malagevolmente	breathing difficulties	INT	RE.BD
IV_138	Pteridaceae E.D.M.Kirchn.	Adiantum capillus-veneris	Adiantum capillus-veneris L.	454	HERB	catarro, che discende allo stomaco; per il	catarrh going down to the stomach	INT	RE.CO
IV_138	Pteridaceae E.D.M.Kirchn.	Adiantum capillus-veneris	Adiantum capillus-veneris L.	454	HERB	sputi del sangue (ristagnare)	bloody cough (to staunch)	INT	RE.CO
IV_138	Pteridaceae E.D.M.Kirchn.	Adiantum capillus-veneris	Adiantum capillus-veneris L.	454	HERB	morso delle serpenti	snakebites	EXT	SK.AB
IV_138	Pteridaceae E.D.M.Kirchn.	Adiantum capillus-veneris	Adiantum capillus-veneris L.	454	HERB	capelli cascati (fare rinascere)	lost hair (to let regrow)	EXT	SK.CO
IV_138	Pteridaceae E.D.M.Kirchn.	Adiantum capillus-veneris	Adiantum capillus-veneris L.	454	HERB	capelli; il cascare de i (prohibire)	hair loss (to prevent)	EXT	SK.CO
IV_138	Pteridaceae E.D.M.Kirchn.	Adiantum capillus-veneris	Adiantum capillus-veneris L.	454	HERB	farfarella (mondificare)	dandruff (to cleanse)	EXT	SK.CO
IV_138	Pteridaceae E.D.M.Kirchn.	Adiantum capillus-veneris	Adiantum capillus-veneris L.	454	HERB	scrofole (risolvere)	scrofulous swellings of glands (to dissolve)	EXT	SK.IF
IV_138	Pteridaceae E.D.M.Kirchn.	Adiantum capillus-veneris	Adiantum capillus-veneris L.	454	HERB	ulcere del capo, che menano	spreading ulcers of the head	EXT	SK.UL
IV_138	Pteridaceae E.D.M.Kirchn.	Adiantum capillus-veneris	Adiantum capillus-veneris L.	454	HERB	milza; difetti della	spleen defects	INT	SPLE
IV_138	Pteridaceae E.D.M.Kirchn.	Adiantum capillus-veneris	Adiantum capillus-veneris L.	454	HERB	pietre (rompere)	urinary calculi (to crush)	INT	UR.CA
IV_138	Pteridaceae E.D.M.Kirchn.	Adiantum capillus-veneris	Adiantum capillus-veneris L.	454	HERB	orina ritenuta	diuretic	INT	UR.DI
IV_141	Poaceae Barnhart	Aegilops neglecta	Aegilops neglecta Req. ex Bertol.	687	HERB	fistole agrimali	lacrimal fistula	EXT	EYES
IV_141	Poaceae Barnhart	Aegilops neglecta	Aegilops neglecta Req. ex Bertol.	687	HERB	durezze (risolvere)	indurations (to dissolve)	EXT	SK.OT
IV_091	Crassulaceae J.St.-Hil.	Aeonium arboreum	Aeonium arboreum (L.) Webb & Berthel.	431	LEAF	phalangi; à i morsi dei	venomous spider bites	INT	ANTI
IV_091	Crassulaceae J.St.-Hil.	Aeonium arboreum	Aeonium arboreum (L.) Webb & Berthel.	431	LEAF	occhi; difetti causati dal sangue	red eyes	EXT	EYES
IV_091	Crassulaceae J.St.-Hil.	Aeonium arboreum	Aeonium arboreum (L.) Webb & Berthel.	431	LEAF	occhi; infiammagioni de gli	eye inflammations	EXT	EYES
IV_091	Crassulaceae J.St.-Hil.	Aeonium arboreum	Aeonium arboreum (L.) Webb & Berthel.	431	LEAF	disenteria & altri flussi del corpo	dysentery & diarrhoea	INT	GA.DI
IV_091	Crassulaceae J.St.-Hil.	Aeonium arboreum	Aeonium arboreum (L.) Webb & Berthel.	431	LEAF	vermini lunghi del corpo (cacciare)	large intestinal worms (to expel)	INT	GA.PL
IV_091	Crassulaceae J.St.-Hil.	Aeonium arboreum	Aeonium arboreum (L.) Webb & Berthel.	431	LEAF	podagre	gout	EXT	GOUT
IV_091	Crassulaceae J.St.-Hil.	Aeonium arboreum	Aeonium arboreum (L.) Webb & Berthel.	431	LEAF	flusso delle donne (ristagnare)	vaginal discharge (to check)	CLY	GY.VD
IV_091	Crassulaceae J.St.-Hil.	Aeonium arboreum	Aeonium arboreum (L.) Webb & Berthel.	431	LEAF	dolore del capo	headache	EXT	NS.PA
IV_091	Crassulaceae J.St.-Hil.	Aeonium arboreum	Aeonium arboreum (L.) Webb & Berthel.	431	LEAF	fuoco sacro (medicare)	erysipelas	EXT	SK.IF
IV_091	Crassulaceae J.St.-Hil.	Aeonium arboreum	Aeonium arboreum (L.) Webb & Berthel.	431	LEAF	cotture del fuoco	burns	EXT	SK.IN
IV_091	Crassulaceae J.St.-Hil.	Aeonium arboreum	Aeonium arboreum (L.) Webb & Berthel.	431	LEAF	ulcere maligne, contumaci & serpiginose (medicare)	malignant, resistive & creeping ulcers (to medicate)	EXT	SK.UL
IV_043	Rosaceae Juss.	Agrimonia eupatoria	Agrimonia eupatoria L.	395	HERB	serpi; à i morsi delle	snake bites	INT	ANTI
IV_043	Rosaceae Juss.	Agrimonia eupatoria	Agrimonia eupatoria L.	395	HERB	disenteria	dysentery	INT	GA.DI
IV_043	Rosaceae Juss.	Agrimonia eupatoria	Agrimonia eupatoria L.	395	HERB	fegato; difetti del	liver defects	INT	GA.LI
IV_043	Rosaceae Juss.	Agrimonia eupatoria	Agrimonia eupatoria L.	395	HERB	ulcere, che malagevolmente si consolidano (medicare)	ulcers that are hard to close (to medicate)	EXT	SK.UL
IV_043	Rosaceae Juss.	Agrimonia eupatoria	Agrimonia eupatoria L.	396	SEED	serpi; à i morsi delle	snake bites	INT	ANTI
IV_043	Rosaceae Juss.	Agrimonia eupatoria	Agrimonia eupatoria L.	396	SEED	disenteria	dysentery	INT	GA.DI
IV_043	Rosaceae Juss.	Agrimonia eupatoria	Agrimonia eupatoria L.	396	SEED	fegato; difetti del	liver defects	INT	GA.LI
III_109	Caryophyllaceae Juss.	Agrostemma githago	Agrostemma githago L.	690	HERB	scorpioni (diventare stupidi & pigri)	scorpions (to make them stupid and slow)	EXT	REPE
III_109	Caryophyllaceae Juss.	Agrostemma githago	Agrostemma githago L.	318	SEED	scorpioni; à i trafitti da gli	scorpion stings	INT	ANTI
III_109	Caryophyllaceae Juss.	Agrostemma githago	Agrostemma githago L.	318	SEED	cholera per il corpo (purgare)	yellow bile (to purge downwards)	INT	HMM
III_169	Lamiaceae Martinov	Ajuga chamaepitys	Ajuga chamaepitys (L.) Schreb.	366	HERB	antidoti contra l'aconito	antidote (aconite)	INT	ANTI
III_170	Lamiaceae Martinov	Ajuga chamaepitys	Ajuga chamaepitys (L.) Schreb.	366	HERB	antidoti contra l'aconito	antidote (aconite)	INT	ANTI
III_169	Lamiaceae Martinov	Ajuga chamaepitys	Ajuga chamaepitys (L.) Schreb.	366	HERB	budella; dolori delle	intestinal pain	INT	GA.FU
III_170	Lamiaceae Martinov	Ajuga chamaepitys	Ajuga chamaepitys (L.) Schreb.	366	HERB	budella; dolori delle	intestinal pain	INT	GA.FU
III_169	Lamiaceae Martinov	Ajuga chamaepitys	Ajuga chamaepitys (L.) Schreb.	366	HERB	fegatosi	liver diseases; those suffering from	INT	GA.LI
III_170	Lamiaceae Martinov	Ajuga chamaepitys	Ajuga chamaepitys (L.) Schreb.	366	HERB	fegatosi	liver diseases; those suffering from	INT	GA.LI
III_169	Lamiaceae Martinov	Ajuga chamaepitys	Ajuga chamaepitys (L.) Schreb.	366	HERB	trabocco di fiele (medicare)	Overflow of bile (to cure) (jaundice)	INT	GA.LI
III_170	Lamiaceae Martinov	Ajuga chamaepitys	Ajuga chamaepitys (L.) Schreb.	366	HERB	trabocco di fiele (medicare)	Overflow of bile (to cure) (jaundice)	INT	GA.LI
III_169	Lamiaceae Martinov	Ajuga chamaepitys	Ajuga chamaepitys (L.) Schreb.	366	HERB	corpo (mollificare)	belly (to soften)	INT	GA.PL
III_170	Lamiaceae Martinov	Ajuga chamaepitys	Ajuga chamaepitys (L.) Schreb.	366	HERB	corpo (mollificare)	belly (to soften)	INT	GA.PL
III_170	Lamiaceae Martinov	Ajuga chamaepitys	Ajuga chamaepitys (L.) Schreb.	366	HERB	corpo (solvere)	belly (to purge)	INT	GA.PL
III_169	Lamiaceae Martinov	Ajuga chamaepitys	Ajuga chamaepitys (L.) Schreb.	366	HERB	corpo (solvere)	belly (to purge)	INT	GA.PL
III_169	Lamiaceae Martinov	Ajuga chamaepitys	Ajuga chamaepitys (L.) Schreb.	366	HERB	madrice (purgare)	uterus (to purge)	CLY	GY.AE
III_170	Lamiaceae Martinov	Ajuga chamaepitys	Ajuga chamaepitys (L.) Schreb.	366	HERB	madrice (purgare)	uterus (to purge)	CLY	GY.AE
III_169	Lamiaceae Martinov	Ajuga chamaepitys	Ajuga chamaepitys (L.) Schreb.	366	HERB	mammelle; durezze delle (risolvere)	breast indurations (to dissolve)	CLY	GY.BR
III_170	Lamiaceae Martinov	Ajuga chamaepitys	Ajuga chamaepitys (L.) Schreb.	366	HERB	mammelle; durezze delle (risolvere)	breast indurations (to dissolve)	CLY	GY.BR
III_169	Lamiaceae Martinov	Ajuga chamaepitys	Ajuga chamaepitys (L.) Schreb.	366	HERB	sciatiche	sciatica	INT	NS.SC
III_170	Lamiaceae Martinov	Ajuga chamaepitys	Ajuga chamaepitys (L.) Schreb.	366	HERB	sciatiche	sciatica	INT	NS.SC
III_169	Lamiaceae Martinov	Ajuga chamaepitys	Ajuga chamaepitys (L.) Schreb.	366	HERB	ulcere, che vanno serpendo (raffrenare)	spreading ulcers (to control)	EXT	SK.UL
III_170	Lamiaceae Martinov	Ajuga chamaepitys	Ajuga chamaepitys (L.) Schreb.	366	HERB	ulcere, che vanno serpendo (raffrenare)	spreading ulcers (to control)	EXT	SK.UL
III_169	Lamiaceae Martinov	Ajuga chamaepitys	Ajuga chamaepitys (L.) Schreb.	366	HERB	ferite (saldare)	wounds (to close)	EXT	SK.WO
III_170	Lamiaceae Martinov	Ajuga chamaepitys	Ajuga chamaepitys (L.) Schreb.	366	HERB	ferite (saldare)	wounds (to close)	EXT	SK.WO
III_170	Lamiaceae Martinov	Ajuga chamaepitys	Ajuga chamaepitys (L.) Schreb.	366	HERB	orina ritenuta	diuretic	INT	UR.DI
III_169	Lamiaceae Martinov	Ajuga chamaepitys	Ajuga chamaepitys (L.) Schreb.	366	HERB	orina ritenuta	diuretic	INT	UR.DI
III_170	Lamiaceae Martinov	Ajuga chamaepitys	Ajuga chamaepitys (L.) Schreb.	366	HERB	reni; difetti delle	kidney defects	INT	UR.OT
III_169	Lamiaceae Martinov	Ajuga chamaepitys	Ajuga chamaepitys (L.) Schreb.	366	HERB	reni; difetti delle	kidney defects	INT	UR.OT
III_163	Alismataceae Vent.	Alisma plantago-aquatica	Alisma plantago-aquatica L.	707	HERB	corpo (ristagnare)	diarrhoea (to check)	INT	GA.DI
III_163	Alismataceae Vent.	Alisma plantago-aquatica	Alisma plantago-aquatica L.	707	HERB	mestrui (provocare)	menstruation (to induce)	INT	GY.AE
III_163	Alismataceae Vent.	Alisma plantago-aquatica	Alisma plantago-aquatica L.	707	HERB	posteme (mitigare)	abscesses (to mitigate)	EXT	SK.IF
III_163	Alismataceae Vent.	Alisma plantago-aquatica	Alisma plantago-aquatica L.	364	SUBT	antidoti contra l'opio	antidote (opium)	INT	ANTI
III_163	Alismataceae Vent.	Alisma plantago-aquatica	Alisma plantago-aquatica L.	364	SUBT	lepre marina; antidoti contra il	antidote (sea hares)	INT	ANTI
III_163	Alismataceae Vent.	Alisma plantago-aquatica	Alisma plantago-aquatica L.	364	SUBT	velenosi animali; morsi de	venomous animal bites	INT	ANTI
III_163	Alismataceae Vent.	Alisma plantago-aquatica	Alisma plantago-aquatica L.	364	SUBT	disenteria	dysentery	INT	GA.DI
III_163	Alismataceae Vent.	Alisma plantago-aquatica	Alisma plantago-aquatica L.	364	SUBT	corpo; dolori di	abdominal pain	INT	GA.FU
III_163	Alismataceae Vent.	Alisma plantago-aquatica	Alisma plantago-aquatica L.	364	SUBT	madrice; à i difetti della	uterine defects	INT	GY.UT
III_163	Alismataceae Vent.	Alisma plantago-aquatica	Alisma plantago-aquatica L.	364	SUBT	spasimati	spastics	INT	MU.IN
IV_025	Boraginaceae Juss.	Alkanna tinctoria	Alkanna tinctoria (L.) Tausch	385	LEAF	corpo (ristagnare)	diarrhoea (to check)	INT	GA.DI
IV_025	Boraginaceae Juss.	Alkanna tinctoria	Alkanna tinctoria (L.) Tausch	384	SUBT	trabocco di fiele	Overflow of bile (jaundice)	INT	GA.LI
IV_025	Boraginaceae Juss.	Alkanna tinctoria	Alkanna tinctoria (L.) Tausch	384	SUBT	fare partorire	to induce labour	CLY	GY.AE
IV_025	Boraginaceae Juss.	Alkanna tinctoria	Alkanna tinctoria (L.) Tausch	384	SUBT	scabbia	scabies	EXT	PARA
IV_025	Boraginaceae Juss.	Alkanna tinctoria	Alkanna tinctoria (L.) Tausch	384	SUBT	vitiligini (sanare)	vitiligo (to cure)	EXT	SK.CO
IV_025	Boraginaceae Juss.	Alkanna tinctoria	Alkanna tinctoria (L.) Tausch	384	SUBT	fuoco sacro (sanare)	erysipelas	EXT	SK.IF
IV_025	Boraginaceae Juss.	Alkanna tinctoria	Alkanna tinctoria (L.) Tausch	384	SUBT	cotture del fuoco	burns	EXT	SK.IN
IV_025	Boraginaceae Juss.	Alkanna tinctoria	Alkanna tinctoria (L.) Tausch	384	SUBT	ulcere vecchie	chronic ulcers	EXT	SK.UL
IV_025	Boraginaceae Juss.	Alkanna tinctoria	Alkanna tinctoria (L.) Tausch	384	SUBT	milza; difetti della	spleen defects	INT	SPLE
IV_025	Boraginaceae Juss.	Alkanna tinctoria	Alkanna tinctoria (L.) Tausch	384	SUBT	reni; difetti delle	kidney defects	INT	UR.OT
IV_074	Solanaceae Juss.	Alkekengi officinarum	Alkekengi officinarum Moench	420	FRU	trabocco di fiele	Overflow of bile (jaundice)	INT	GA.LI
IV_074	Solanaceae Juss.	Alkekengi officinarum	Alkekengi officinarum Moench	420	FRU	orina (provocare)	diuretic	INT	UR.DI
IV_074	Solanaceae Juss.	Alkekengi officinarum	Alkekengi officinarum Moench	616	LEAF	fistole agrimali	lacrimal fistula	EXT	EYES
IV_074	Solanaceae Juss.	Alkekengi officinarum	Alkekengi officinarum Moench	616	LEAF	occhi; flussi de gli	eye rheums	EXT	EYES
IV_074	Solanaceae Juss.	Alkekengi officinarum	Alkekengi officinarum Moench	616	LEAF	mestrui (ristagnare)	menstrual bleeding (to staunch)	CLY	GY.VD
IV_074	Solanaceae Juss.	Alkekengi officinarum	Alkekengi officinarum Moench	616	LEAF	dolori di testa	headache	EXT	NS.PA
IV_074	Solanaceae Juss.	Alkekengi officinarum	Alkekengi officinarum Moench	616	LEAF	orecchie; dolore delle (levare via)	earache (to relief)	EXT	NS.PA
IV_074	Solanaceae Juss.	Alkekengi officinarum	Alkekengi officinarum Moench	616	LEAF	fuoco sacro (conferire)	erysipelas	EXT	SK.IF
IV_074	Solanaceae Juss.	Alkekengi officinarum	Alkekengi officinarum Moench	616	LEAF	fuoco sacro; al	erysipelas	EXT	SK.IF
IV_074	Solanaceae Juss.	Alkekengi officinarum	Alkekengi officinarum Moench	616	LEAF	posteme dopo alle orecchie (risolvere)	abscesses behind the ear (to dissolve)	EXT	SK.IF
IV_074	Solanaceae Juss.	Alkekengi officinarum	Alkekengi officinarum Moench	616	LEAF	infiammagioni de pannicoli del cervello degli fanciulli	heatstroke (children)	EXT	SK.IN
IV_074	Solanaceae Juss.	Alkekengi officinarum	Alkekengi officinarum Moench	616	LEAF	ulcere corrosive	creeping ulcers	EXT	SK.UL
IV_074	Solanaceae Juss.	Alkekengi officinarum	Alkekengi officinarum Moench	616	LEAF	ulcere serpiginose	creeping ulcers	EXT	SK.UL
II_139	Amaryllidaceae J.St.-Hil.	Allium ampeloprasum	Allium ampeloprasum L.	195	LEAF	velenosi animali; à morsi de	venomous animal bites	INT	ANTI
II_138	Amaryllidaceae J.St.-Hil.	Allium ampeloprasum	Allium ampeloprasum L.	195	LEAF	orecchie; suffoli delle (medicare)	tinnitus (to treat)	EXT	EARS
II_138	Amaryllidaceae J.St.-Hil.	Allium ampeloprasum	Allium ampeloprasum L.	195	LEAF	buono al corpo	good for the body	INT	FOOD
II_138	Amaryllidaceae J.St.-Hil.	Allium ampeloprasum	Allium ampeloprasum L.	195	LEAF	mestrui (provocare)	menstruation (to induce)	INT	GY.AE
II_139	Amaryllidaceae J.St.-Hil.	Allium ampeloprasum	Allium ampeloprasum L.	195	LEAF	mestrui (provocare)	menstruation (to induce)	INT	GY.AE
II_138	Amaryllidaceae J.St.-Hil.	Allium ampeloprasum	Allium ampeloprasum L.	195	LEAF	luoghi naturali; per le durezze de i	uterine indurations	EXT	GY.UT
II_138	Amaryllidaceae J.St.-Hil.	Allium ampeloprasum	Allium ampeloprasum L.	195	LEAF	luoghi naturali; per le oppilationi de i	uterine obstruction	INT	GY.UT
II_138	Amaryllidaceae J.St.-Hil.	Allium ampeloprasum	Allium ampeloprasum L.	195	LEAF	venere (stimolare)	aphrodisiac	INT	LIBI
II_138	Amaryllidaceae J.St.-Hil.	Allium ampeloprasum	Allium ampeloprasum L.	195	LEAF	orecchie; dolori delle	earache	EXT	NS.PA
II_138	Amaryllidaceae J.St.-Hil.	Allium ampeloprasum	Allium ampeloprasum L.	195	LEAF	gorgozzule (purgare)	trachea (to purge)	INT	RE.CO
II_138	Amaryllidaceae J.St.-Hil.	Allium ampeloprasum	Allium ampeloprasum L.	195	LEAF	polmone; canna del (purgare)	trachea (to purge)	INT	RE.CO
II_138	Amaryllidaceae J.St.-Hil.	Allium ampeloprasum	Allium ampeloprasum L.	195	LEAF	petto	chest	INT	RE.OT
II_138	Amaryllidaceae J.St.-Hil.	Allium ampeloprasum	Allium ampeloprasum L.	195	LEAF	petto; difetti del	chest defects	INT	RE.OT
II_138	Amaryllidaceae J.St.-Hil.	Allium ampeloprasum	Allium ampeloprasum L.	195	LEAF	thisici	tuberculosis	INT	RE.OT
II_138	Amaryllidaceae J.St.-Hil.	Allium ampeloprasum	Allium ampeloprasum L.	195	LEAF	morsi de velenosi animali	bites of venomous animals	EXT	SK.AB
II_138	Amaryllidaceae J.St.-Hil.	Allium ampeloprasum	Allium ampeloprasum L.	195	LEAF	cauterij; eschare de (rompere)	eschars [burnt tissue] (to break)	EXT	SK.CO
II_138	Amaryllidaceae J.St.-Hil.	Allium ampeloprasum	Allium ampeloprasum L.	195	LEAF	quosi (sanare)	facial blemishes	EXT	SK.CO
II_138	Amaryllidaceae J.St.-Hil.	Allium ampeloprasum	Allium ampeloprasum L.	195	LEAF	epinittidi	pustules	EXT	SK.IF
II_139	Amaryllidaceae J.St.-Hil.	Allium ampeloprasum	Allium ampeloprasum L.	195	LEAF	fare orinare	diuretic	INT	UR.DI
II_138	Amaryllidaceae J.St.-Hil.	Allium ampeloprasum	Allium ampeloprasum L.	195	LEAF	orina (provocare)	diuretic	INT	UR.DI
II_138	Amaryllidaceae J.St.-Hil.	Allium ampeloprasum	Allium ampeloprasum L.	195	LEAF	smagrire	to reduce weight	INT	VAR
II_138	Amaryllidaceae J.St.-Hil.	Allium ampeloprasum	Allium ampeloprasum L.	674	SEED	petto; l'antico rigittare del sangue, che vien dal (ristagnare)	hematemesis	INT	GA.FU
II_138	Amaryllidaceae J.St.-Hil.	Allium ampeloprasum	Allium ampeloprasum L.	674	SEED	naso; sangue del (ristagnare)	epistaxis (to stop)	INT	NOSE
II_140	Amaryllidaceae J.St.-Hil.	Allium cepa	Allium cepa L.	196	SUBT	orecchie; gravezza delle	ears; heaviness of the	EXT	EARS
II_140	Amaryllidaceae J.St.-Hil.	Allium cepa	Allium cepa L.	196	SUBT	orecchie; suffoli delle	tinnitus	EXT	EARS
II_140	Amaryllidaceae J.St.-Hil.	Allium cepa	Allium cepa L.	196	SUBT	occhi caccolosi (curare)	bleary eyes (to cure)	EXT	EYES
II_140	Amaryllidaceae J.St.-Hil.	Allium cepa	Allium cepa L.	196	SUBT	occhi; fiocchi de gli	visual impairments	EXT	EYES
II_140	Amaryllidaceae J.St.-Hil.	Allium cepa	Allium cepa L.	196	SUBT	occhi; nuvolette de gli	blurred vision	EXT	EYES
II_140	Amaryllidaceae J.St.-Hil.	Allium cepa	Allium cepa L.	196	SUBT	occhi; suffusioni de gli	cataract	EXT	EYES
II_140	Amaryllidaceae J.St.-Hil.	Allium cepa	Allium cepa L.	196	SUBT	vista (rischiarare)	vision (to clear up)	EXT	EYES
II_140	Amaryllidaceae J.St.-Hil.	Allium cepa	Allium cepa L.	196	SUBT	cibo	food	INT	FOOD
II_140	Amaryllidaceae J.St.-Hil.	Allium cepa	Allium cepa L.	196	SUBT	corpo (ristagnare)	diarrhoea (to check)	INT	GA.DI
II_140	Amaryllidaceae J.St.-Hil.	Allium cepa	Allium cepa L.	196	SUBT	provocano l'appetito	appetiser	INT	GA.FU
II_140	Amaryllidaceae J.St.-Hil.	Allium cepa	Allium cepa L.	196	SUBT	mestrui (provocare)	menstruation (to induce)	CLY	GY.AE
II_140	Amaryllidaceae J.St.-Hil.	Allium cepa	Allium cepa L.	196	SUBT	testa (purgare)	head (to purge)	EXT	NOSE
II_140	Amaryllidaceae J.St.-Hil.	Allium cepa	Allium cepa L.	196	SUBT	schirantia	angina (diphtheria)	EXT	RE.OT
II_140	Amaryllidaceae J.St.-Hil.	Allium cepa	Allium cepa L.	196	SUBT	morso dei cani	dog bite	EXT	SK.AB
II_140	Amaryllidaceae J.St.-Hil.	Allium cepa	Allium cepa L.	196	SUBT	capelli cascati (fare rinascere)	lost hair (to let regrow)	EXT	SK.CO
II_140	Amaryllidaceae J.St.-Hil.	Allium cepa	Allium cepa L.	196	SUBT	vitiligini (guarire)	vitiligo (to cure)	EXT	SK.CO
II_140	Amaryllidaceae J.St.-Hil.	Allium cepa	Allium cepa L.	196	SUBT	orecchie; orecchie; marcia delle (almenare)	ear infection	EXT	SK.IF
II_140	Amaryllidaceae J.St.-Hil.	Allium cepa	Allium cepa L.	196	SUBT	posteme (maturare)	abscesses (to ripen)	EXT	SK.IF
II_140	Amaryllidaceae J.St.-Hil.	Allium cepa	Allium cepa L.	196	SUBT	scorticature de i piedi causate dalle scarpe	abrasions caused by shoes	EXT	SK.WO
II_140	Amaryllidaceae J.St.-Hil.	Allium cepa	Allium cepa L.	196	SUBT	orina (provocare)	diuretic	INT	UR.DI
II_140	Amaryllidaceae J.St.-Hil.	Allium cepa	Allium cepa L.	196	SUBT	superfluità che escono per l'hemorrhoide; alle (aprire le vie)	haemorrhoids	CLY	VASC
II_141	Amaryllidaceae J.St.-Hil.	Allium sativum	Allium sativum L.	501	LEAF	mestrui (provocare)	menstruation (to induce)	EXT	GY.AE
II_141	Amaryllidaceae J.St.-Hil.	Allium sativum	Allium sativum L.	501	LEAF	secondine (provocare)	placenta (to promote expulsion)	EXT	GY.AE
II_141	Amaryllidaceae J.St.-Hil.	Allium sativum	Allium sativum L.	197	SUBT	morsi delle vipere	viper bites	INT	ANTI
II_141	Amaryllidaceae J.St.-Hil.	Allium sativum	Allium sativum L.	197	SUBT	cibo	food	INT	FOOD
II_141	Amaryllidaceae J.St.-Hil.	Allium sativum	Allium sativum L.	197	SUBT	vermini larghi (cacciare fuori)	large intestinal worms (to drive out)	INT	GA.PL
II_141	Amaryllidaceae J.St.-Hil.	Allium sativum	Allium sativum L.	197	SUBT	mestrui (provocare)	menstruation (to induce)	FUMI	GY.AE
II_141	Amaryllidaceae J.St.-Hil.	Allium sativum	Allium sativum L.	197	SUBT	dolore dei denti	toothache	EXT	NS.PA
II_141	Amaryllidaceae J.St.-Hil.	Allium sativum	Allium sativum L.	197	SUBT	lendini (ammazzare)	nits (to kill)	INT	PARA
II_141	Amaryllidaceae J.St.-Hil.	Allium sativum	Allium sativum L.	197	SUBT	pidocchi (ammazzare)	lice (to kill)	INT	PARA
II_141	Amaryllidaceae J.St.-Hil.	Allium sativum	Allium sativum L.	197	SUBT	scabbia	scabies	EXT	PARA
II_141	Amaryllidaceae J.St.-Hil.	Allium sativum	Allium sativum L.	197	SUBT	tosse vecchia (alleggerire)	chronic cough (to alleviate)	INT	RE.CO
II_141	Amaryllidaceae J.St.-Hil.	Allium sativum	Allium sativum L.	197	SUBT	voce (chiarificare)	voice (to clear up)	INT	RE.OT
II_141	Amaryllidaceae J.St.-Hil.	Allium sativum	Allium sativum L.	197	SUBT	morsi de gli animali rabbiosi	bites of rabid animals	EXT	SK.AB
II_141	Amaryllidaceae J.St.-Hil.	Allium sativum	Allium sativum L.	197	SUBT	morso del topo ragno	shrew bite	EXT	SK.AB
II_141	Amaryllidaceae J.St.-Hil.	Allium sativum	Allium sativum L.	197	SUBT	capelli cascati per pelagonie (fare rinascere)	lost hair (to let regrow)	EXT	SK.CO
II_141	Amaryllidaceae J.St.-Hil.	Allium sativum	Allium sativum L.	197	SUBT	farfarella; il capo dalla (sanare)	dandruff (to cure)	EXT	SK.CO
II_141	Amaryllidaceae J.St.-Hil.	Allium sativum	Allium sativum L.	197	SUBT	lentigini	freckles	EXT	SK.CO
II_141	Amaryllidaceae J.St.-Hil.	Allium sativum	Allium sativum L.	197	SUBT	vitiligini	vitiligo	EXT	SK.CO
II_141	Amaryllidaceae J.St.-Hil.	Allium sativum	Allium sativum L.	197	SUBT	bolle, che escono per la persona (sanare)	blisters (to cure)	EXT	SK.IN
II_141	Amaryllidaceae J.St.-Hil.	Allium sativum	Allium sativum L.	197	SUBT	volatiche	facial eruptions	EXT	SK.IN
II_141	Amaryllidaceae J.St.-Hil.	Allium sativum	Allium sativum L.	197	SUBT	ulcere del capo, che menano	spreading ulcers of the head	EXT	SK.UL
II_141	Amaryllidaceae J.St.-Hil.	Allium sativum	Allium sativum L.	197	SUBT	hidropici	dropsy	INT	UR.DI
II_141	Amaryllidaceae J.St.-Hil.	Allium sativum	Allium sativum L.	197	SUBT	orina (provocare)	diuretic	INT	UR.DI
II_141	Amaryllidaceae J.St.-Hil.	Allium sativum	Allium sativum L.	197	SUBT	hemorrhoidi	haemorrhoids	INT	VASC
II_142	Amaryllidaceae J.St.-Hil.	Allium sp.	Allium sphaerocephalon L.	723	SUBT	orecchie; gravezza delle	ears; heaviness of the	EXT	EARS
II_142	Amaryllidaceae J.St.-Hil.	Allium sp.	Allium sphaerocephalon L.	723	SUBT	orecchie; suffoli delle	tinnitus	EXT	EARS
II_142	Amaryllidaceae J.St.-Hil.	Allium sp.	Allium sphaerocephalon L.	723	SUBT	occhi caccolosi (curare)	bleary eyes (to cure)	EXT	EYES
II_142	Amaryllidaceae J.St.-Hil.	Allium sp.	Allium sphaerocephalon L.	723	SUBT	occhi; fiocchi de gli	visual impairments	EXT	EYES
II_142	Amaryllidaceae J.St.-Hil.	Allium sp.	Allium sphaerocephalon L.	723	SUBT	occhi; nuvolette de gli	blurred/cloudy vision	EXT	EYES
II_142	Amaryllidaceae J.St.-Hil.	Allium sp.	Allium sphaerocephalon L.	723	SUBT	occhi; suffusioni de gli	cataract	EXT	EYES
II_142	Amaryllidaceae J.St.-Hil.	Allium sp.	Allium sphaerocephalon L.	723	SUBT	vista (rischiarare)	vision (to clear up)	EXT	EYES
II_142	Amaryllidaceae J.St.-Hil.	Allium sp.	Allium sphaerocephalon L.	723	SUBT	corpo (ristagnare)	diarrhoea (to check)	INT	GA.DI
II_142	Amaryllidaceae J.St.-Hil.	Allium sp.	Allium sphaerocephalon L.	723	SUBT	mestrui (provocare)	menstruation (to induce)	CLY	GY.AE
II_142	Amaryllidaceae J.St.-Hil.	Allium sp.	Allium sphaerocephalon L.	723	SUBT	testa (purgare)	head (to purge)	EXT	NOSE
II_142	Amaryllidaceae J.St.-Hil.	Allium sp.	Allium sphaerocephalon L.	723	SUBT	schirantia	angina (diphtheria)	EXT	RE.OT
II_142	Amaryllidaceae J.St.-Hil.	Allium sp.	Allium sphaerocephalon L.	723	SUBT	morso dei cani	dog bite	EXT	SK.AB
II_142	Amaryllidaceae J.St.-Hil.	Allium sp.	Allium sphaerocephalon L.	723	SUBT	vitiligini (guarire)	vitiligo (to cure)	EXT	SK.CO
II_142	Amaryllidaceae J.St.-Hil.	Allium sp.	Allium sphaerocephalon L.	723	SUBT	orecchie; orecchie; marcia delle (almenare)	ear infection	EXT	SK.IF
II_142	Amaryllidaceae J.St.-Hil.	Allium sp.	Allium sphaerocephalon L.	723	SUBT	posteme (maturare)	abscesses (to ripen)	EXT	SK.IF
II_142	Amaryllidaceae J.St.-Hil.	Allium sp.	Allium sphaerocephalon L.	723	SUBT	scorticature de i piedi causate dalle scarpe	abrasions caused by shoes	EXT	SK.WO
II_142	Amaryllidaceae J.St.-Hil.	Allium sp.	Allium sphaerocephalon L.	723	SUBT	orina (provocare)	diuretic	INT	UR.DI
II_142	Amaryllidaceae J.St.-Hil.	Allium sp.	Allium sphaerocephalon L.	723	SUBT	superfluità che escono per l'hemorrhoide; alle (aprire le vie)	haemorrhoids	CLY	VASC
III_023	Asphodelaceae Juss.	Aloe sp.	Aloe vera (L.) Burm.f.	554	EXUD	occhi; medicine de gli	eye medicine	EXT	EYES
III_023	Asphodelaceae Juss.	Aloe sp.	Aloe vera (L.) Burm.f.	554	EXUD	prurito de gli angoli de gli occhi (mitigare)	itching canthus	EXT	EYES
III_023	Asphodelaceae Juss.	Aloe sp.	Aloe vera (L.) Burm.f.	554	EXUD	rigittare del sangue (ristagnare)	hematemesis (to staunch)	INT	GA.FU
III_023	Asphodelaceae Juss.	Aloe sp.	Aloe vera (L.) Burm.f.	554	EXUD	trabocco di fiele	Overflow of bile (jaundice)	INT	GA.LI
III_023	Asphodelaceae Juss.	Aloe sp.	Aloe vera (L.) Burm.f.	554	EXUD	stomaco (purgare)	stomach (to purge)	INT	GA.PL
III_023	Asphodelaceae Juss.	Aloe sp.	Aloe vera (L.) Burm.f.	554	EXUD	gengive; difetti delle	gum defects	EXT	MOUTH
III_023	Asphodelaceae Juss.	Aloe sp.	Aloe vera (L.) Burm.f.	554	EXUD	ulcere della bocca	oral ulcers	EXT	MOUTH
III_023	Asphodelaceae Juss.	Aloe sp.	Aloe vera (L.) Burm.f.	554	EXUD	lividi (svanire)	bruises (to remove)	EXT	MU.EX
III_023	Asphodelaceae Juss.	Aloe sp.	Aloe vera (L.) Burm.f.	554	EXUD	dolore del capo (levare)	headache (to alleviate)	EXT	NS.PA
III_023	Asphodelaceae Juss.	Aloe sp.	Aloe vera (L.) Burm.f.	554	EXUD	sonno (provocare)	soporific	INT	NS.PS
III_023	Asphodelaceae Juss.	Aloe sp.	Aloe vera (L.) Burm.f.	554	EXUD	gorgozzule; difetti del	trachea defects	EXT	RE.CO
III_023	Asphodelaceae Juss.	Aloe sp.	Aloe vera (L.) Burm.f.	554	EXUD	sputi del sangue (ristagnare)	bloody cough (to staunch)	INT	RE.CO
III_023	Asphodelaceae Juss.	Aloe sp.	Aloe vera (L.) Burm.f.	554	EXUD	capelli, che cascano (fermare)	hair loss (to stop)	EXT	SK.CO
III_023	Asphodelaceae Juss.	Aloe sp.	Aloe vera (L.) Burm.f.	554	EXUD	palpebre; scabrosità delle (addolcire)	roughness of eyelids (to alleviate)	EXT	SK.CO
III_023	Asphodelaceae Juss.	Aloe sp.	Aloe vera (L.) Burm.f.	554	EXUD	posteme del sedere (sanare)	abscesses of the buttocks (to cure)	EXT	SK.IF
III_023	Asphodelaceae Juss.	Aloe sp.	Aloe vera (L.) Burm.f.	554	EXUD	dita; reduvie delle (saldare)	excrescences of the cuticle of the fingernails [eponychium] (to close)	EXT	SK.OT
III_023	Asphodelaceae Juss.	Aloe sp.	Aloe vera (L.) Burm.f.	554	EXUD	ulcere (ferrare & cicatrizare)	ulcers (to shut & cicatrize)	EXT	SK.UL
III_023	Asphodelaceae Juss.	Aloe sp.	Aloe vera (L.) Burm.f.	554	EXUD	ulcere delle parti genitali (serrare & cicatrizare)	ulcers of genitals (to close & cicatrize)	EXT	SK.UL
III_023	Asphodelaceae Juss.	Aloe sp.	Aloe vera (L.) Burm.f.	554	EXUD	ferite (consolidare)	wounds (to close)	EXT	SK.WO
III_023	Asphodelaceae Juss.	Aloe sp.	Aloe vera (L.) Burm.f.	554	EXUD	flussi del sangue (ristagnare)	bleedings (to staunch)	EXT	SK.WO
III_023	Asphodelaceae Juss.	Aloe sp.	Aloe vera (L.) Burm.f.	554	EXUD	preputij de i fanciulli, quando si rompono (ricongiungere)	broken foreskin of boys (to rejoin)	EXT	SK.WO
III_023	Asphodelaceae Juss.	Aloe sp.	Aloe vera (L.) Burm.f.	554	EXUD	sedere; fissure del (sanare)	anal fissures (to cure)	EXT	SK.WO
III_023	Asphodelaceae Juss.	Aloe sp.	Aloe vera (L.) Burm.f.	554	EXUD	hemorrhoidi (ristagnare)	haemorrhoids (to cure)	CLY	VASC
III_157	Malvaceae Juss.	Althaea officinalis	Althaea officinalis L.	359	LEAF	morsi	bites	EXT	SK.AB
III_157	Malvaceae Juss.	Althaea officinalis	Althaea officinalis L.	359	LEAF	cotture del fuoco	burns	EXT	SK.IN
III_157	Malvaceae Juss.	Althaea officinalis	Althaea officinalis L.	358	SEED (Fruit)	animale, che trafigge; punture delle	animal stings	INT	ANTI
III_157	Malvaceae Juss.	Althaea officinalis	Althaea officinalis L.	358	SEED (Fruit)	disenteria	dysentery	INT	GA.DI
III_157	Malvaceae Juss.	Althaea officinalis	Althaea officinalis L.	358	SEED (Fruit)	flusso del corpo	abdominal fluxes	INT	GA.DI
III_157	Malvaceae Juss.	Althaea officinalis	Althaea officinalis L.	358	SEED (Fruit)	rigittare del sangue; al	hematemesis	INT	GA.FU
III_157	Malvaceae Juss.	Althaea officinalis	Althaea officinalis L.	357	SUBT	disenteria	dysentery	INT	GA.DI
III_157	Malvaceae Juss.	Althaea officinalis	Althaea officinalis L.	357	SUBT	parto; reliquie del (provocare)	placenta (to promote expulsion)	INT	GY.AE
III_157	Malvaceae Juss.	Althaea officinalis	Althaea officinalis L.	357	SUBT	superfluita, che aggravano la madrice delle donne in parto (provocare)	parturient uterine matter (to induce expulsion)	INT	GY.AE
III_157	Malvaceae Juss.	Althaea officinalis	Althaea officinalis L.	357	SUBT	mammelle; infiammagioni delle	inflamed breasts	EXT	GY.BR
III_157	Malvaceae Juss.	Althaea officinalis	Althaea officinalis L.	357	SUBT	madrice; all' oppilationi della	uterine obstruction	CLY	GY.UT
III_157	Malvaceae Juss.	Althaea officinalis	Althaea officinalis L.	357	SUBT	madrice; alle infiammagioni della	inflammation of the uterus	CLY	GY.UT
III_157	Malvaceae Juss.	Althaea officinalis	Althaea officinalis L.	357	SUBT	nervi; alle percosse de	tendon ruptures	EXT	MU.EX
III_157	Malvaceae Juss.	Althaea officinalis	Althaea officinalis L.	357	SUBT	nervi; frigidità de	chilled tendons	EXT	MU.EX
III_157	Malvaceae Juss.	Althaea officinalis	Althaea officinalis L.	357	SUBT	rotti; à i	ruptured; the	INT	MU.IN
III_157	Malvaceae Juss.	Althaea officinalis	Althaea officinalis L.	357	SUBT	dolore dei dentii (mitigare)	toothache (to mitigate)	EXT	NS.PA
III_157	Malvaceae Juss.	Althaea officinalis	Althaea officinalis L.	357	SUBT	sciatiche	sciatica	INT	NS.SC
III_157	Malvaceae Juss.	Althaea officinalis	Althaea officinalis L.	357	SUBT	tremori	tremor	INT	NS.VA
III_157	Malvaceae Juss.	Althaea officinalis	Althaea officinalis L.	357	SUBT	animali velenosi; morso & le punture de gli (prohibire)	venomous animals (to repel)	EXT	REPE
III_157	Malvaceae Juss.	Althaea officinalis	Althaea officinalis L.	357	SUBT	morso de gli animali velenosi (prohibire)	venomous animals (to repel)	EXT	REPE
III_157	Malvaceae Juss.	Althaea officinalis	Althaea officinalis L.	357	SUBT	vitiligini (spegnere)	vitiligo (to remove)	EXT	SK.CO
III_157	Malvaceae Juss.	Althaea officinalis	Althaea officinalis L.	357	SUBT	posteme dopo alle orecchie	abscesses behind the ear	EXT	SK.IF
III_157	Malvaceae Juss.	Althaea officinalis	Althaea officinalis L.	357	SUBT	posteme; alle	abscesses	EXT	SK.IF
III_157	Malvaceae Juss.	Althaea officinalis	Althaea officinalis L.	357	SUBT	scrofole	scrofulous swellings of glands	EXT	SK.IF
III_157	Malvaceae Juss.	Althaea officinalis	Althaea officinalis L.	357	SUBT	ferite fresche	fresh wounds	EXT	SK.WO
III_157	Malvaceae Juss.	Althaea officinalis	Althaea officinalis L.	357	SUBT	pietra; crudità della	urinary calculi	INT	UR.CA
III_157	Malvaceae Juss.	Althaea officinalis	Althaea officinalis L.	357	SUBT	orinare; difficultà dell'	urinary retention	INT	UR.OT
III_157	Malvaceae Juss.	Althaea officinalis	Althaea officinalis L.	357	SUBT	sedere; rotture del	buttocks ruptures	EXT	VAR
III_123	Asteraceae Bercht. & J.Presl	Ambrosia maritima L.	Ambrosia maritima L.	601	HERB	humori che scendono nelle membra (ripercuotere, mitigare & ristringere)	humours flowing down the limbs	EXT	HMM
I_014	Zingiberaceae Martinov	Amomum subulatum	Amomum subulatum Roxb.	633	FRU	antidoti	antidote	INT	ANTI
I_014	Zingiberaceae Martinov	Amomum subulatum	Amomum subulatum Roxb.	633	FRU	occhi; infiammagioni de gli	eye inflammations	EXT	EYES
I_014	Zingiberaceae Martinov	Amomum subulatum	Amomum subulatum Roxb.	633	FRU	fegatosi	liver diseases; those suffering from	INT	GA.LI
I_014	Zingiberaceae Martinov	Amomum subulatum	Amomum subulatum Roxb.	633	FRU	gottosi	gout	EXT	GOUT
I_014	Zingiberaceae Martinov	Amomum subulatum	Amomum subulatum Roxb.	633	FRU	madrice; alle difetti della	uterine conditions	EXT	GY.UT
I_014	Zingiberaceae Martinov	Amomum subulatum	Amomum subulatum Roxb.	633	FRU	madrice; alle difetti della	uterine conditions	CLY	GY.UT
I_014	Zingiberaceae Martinov	Amomum subulatum	Amomum subulatum Roxb.	633	FRU	doloro (levare via)	pain (to alleviate)	INT	NS.PA
I_014	Zingiberaceae Martinov	Amomum subulatum	Amomum subulatum Roxb.	633	FRU	sonno (provocare)	soporific	INT	NS.PS
I_014	Zingiberaceae Martinov	Amomum subulatum	Amomum subulatum Roxb.	633	FRU	punture de gli scorpioni	scorpion stings	EXT	SK.AB
I_014	Zingiberaceae Martinov	Amomum subulatum	Amomum subulatum Roxb.	633	FRU	posteme, che chiamano meliceride	abscesses	INT	SK.IF
I_014	Zingiberaceae Martinov	Amomum subulatum	Amomum subulatum Roxb.	633	FRU	reni; malattie delle	kidney diseases	INT	UR.OT
III_080	Asteraceae Bercht. & J.Presl	Anacyclus pyrethrum	Anacyclus pyrethrum (L.) Lag.	296	SUBT	dolore dei denti	toothache	EXT	NS.PA
III_080	Asteraceae Bercht. & J.Presl	Anacyclus pyrethrum	Anacyclus pyrethrum (L.) Lag.	296	SUBT	membri infrigiditi & paralitici	chilled and paralyzed limbs	INT	NS.VA
III_080	Asteraceae Bercht. & J.Presl	Anacyclus pyrethrum	Anacyclus pyrethrum (L.) Lag.	296	SUBT	tremori lunghi	prolonged tremor	INT	NS.VA
III_161	Fabaceae Lindl.	Anagyris foetida	Anagyris foetida L.	361	LEAF	donne, che difficilmente partoriscono; alle	difficult childbirth (to facilitate)	EXT	GY.AE
III_161	Fabaceae Lindl.	Anagyris foetida	Anagyris foetida L.	361	LEAF	mestrui (provocare)	menstruation (to induce)	INT	GY.AE
III_161	Fabaceae Lindl.	Anagyris foetida	Anagyris foetida L.	361	LEAF	parto (provocare)	delivery (to induce)	INT	GY.AE
III_161	Fabaceae Lindl.	Anagyris foetida	Anagyris foetida L.	361	LEAF	secondine (provocare)	placenta (to promote expulsion)	INT	GY.AE
III_161	Fabaceae Lindl.	Anagyris foetida	Anagyris foetida L.	361	LEAF	dolore del capo	headache	INT	NS.PA
III_161	Fabaceae Lindl.	Anagyris foetida	Anagyris foetida L.	361	LEAF	asmatici	asthmatics	INT	RE.BD
III_161	Fabaceae Lindl.	Anagyris foetida	Anagyris foetida L.	361	LEAF	posteme (ripercuotere)	abscesses (to repulse)	EXT	SK.IF
III_161	Fabaceae Lindl.	Anagyris foetida	Anagyris foetida L.	363	SEED	vomito (provocare)	vomiting (to induce)	INT	GA.PL
III_161	Fabaceae Lindl.	Anagyris foetida	Anagyris foetida L.	362	SUBT	risolvere & maturare	digestif	INT	GA.FU
IV_130	Boraginaceae Juss.	Anchusa sp.	Anchusa azurea Mill.	447	HERB	febbre terzana & quartana	tertian & quartan fever	INT	FEVE
IV_130	Boraginaceae Juss.	Anchusa sp.	Anchusa azurea Mill.	447	HERB	animo (rallegrare & consolare)	mood (to make cheerful)	EXT	NS.PS
IV_130	Boraginaceae Juss.	Anchusa sp.	Anchusa azurea Mill.	447	HERB	posteme; alle	abscesses	EXT	SK.IF
IV_130	Boraginaceae Juss.	Anchusa sp.	Anchusa azurea Mill.	448	SEED	febbre terzana & quartana	tertian & quartan fever	INT	FEVE
IV_130	Boraginaceae Juss.	Anchusa sp.	Anchusa azurea Mill.	448	SEED	animo (rallegrare & consolare)	mood (to make cheerful)	EXT	NS.PS
IV_130	Boraginaceae Juss.	Anchusa sp.	Anchusa azurea Mill.	448	SEED	posteme; alle	abscesses	EXT	SK.IF
IV_130	Boraginaceae Juss.	Anchusa sp.	Anchusa azurea Mill.	449	SUBT	febbre terzana & quartana	tertian & quartan fever	INT	FEVE
IV_130	Boraginaceae Juss.	Anchusa sp.	Anchusa azurea Mill.	449	SUBT	animo (rallegrare & consolare)	mood (to make cheerful)	EXT	NS.PS
IV_130	Boraginaceae Juss.	Anchusa sp.	Anchusa azurea Mill.	449	SUBT	posteme; alle	abscesses	EXT	SK.IF
II_167	Ranunculaceae Juss.	Anemone sp.	Anemone coronaria L.	225	HERB	mestrui (provocare)	menstruation (to induce)	CLY	GY.AE
II_167	Ranunculaceae Juss.	Anemone sp.	Anemone coronaria L.	225	HERB	latte (fare abondare)	lactation (to suppress)	INT	GY.BR
II_167	Ranunculaceae Juss.	Anemone sp.	Anemone coronaria L.	225	HERB	scabbia (guarire)	scabies (to cure)	EXT	PARA
II_167	Ranunculaceae Juss.	Anemone sp.	Anemone coronaria L.	223	LEAF	testa (purgare)	head (to purge)	EXT	NOSE
II_167	Ranunculaceae Juss.	Anemone sp.	Anemone coronaria L.	224	SUBT	occhi; cicatrici de gli	scars in the eyes	EXT	EYES
II_167	Ranunculaceae Juss.	Anemone sp.	Anemone coronaria L.	224	SUBT	occhi; debolezze de gli	eyes, weakness of the	EXT	EYES
II_167	Ranunculaceae Juss.	Anemone sp.	Anemone coronaria L.	224	SUBT	flemma (tirare)	phlegm (to draw out)	EXT	RE.CO
II_167	Ranunculaceae Juss.	Anemone sp.	Anemone coronaria L.	224	SUBT	infiammagioni (medicare)	inflammations (to medicate)	EXT	SK.IN
II_167	Ranunculaceae Juss.	Anemone sp.	Anemone coronaria L.	224	SUBT	ulcere sordide (mondificare)	filthy ulcers (to cleanse)	EXT	SK.UL
III_062	Apiaceae Lindl.	Anethum graveolens	Anethum graveolens L.	519	LEAF	sperma (disseccare)	sperm (to decrease)	INT	ANDR
III_062	Apiaceae Lindl.	Anethum graveolens	Anethum graveolens L.	519	LEAF	corpo (ristagnare)	diarrhoea (to check)	INT	GA.DI
III_062	Apiaceae Lindl.	Anethum graveolens	Anethum graveolens L.	519	LEAF	corpo; dolori del (levare)	abdominal pain (to alleviate)	INT	GA.FU
III_062	Apiaceae Lindl.	Anethum graveolens	Anethum graveolens L.	519	LEAF	singhiozzo (alleggerire)	hiccup (to alleviate)	INT	GA.FU
III_062	Apiaceae Lindl.	Anethum graveolens	Anethum graveolens L.	519	LEAF	vomiti (ristagnare)	vomiting (to check)	INT	GA.FU
III_062	Apiaceae Lindl.	Anethum graveolens	Anethum graveolens L.	519	LEAF	latte (fare ritornare)	lactation (to restore)	INT	GY.BR
III_062	Apiaceae Lindl.	Anethum graveolens	Anethum graveolens L.	519	LEAF	madrice; per li difetti della	uterine conditions	EXT	GY.UT
III_062	Apiaceae Lindl.	Anethum graveolens	Anethum graveolens L.	519	LEAF	orina (provocare)	diuretic	INT	UR.DI
III_062	Apiaceae Lindl.	Anethum graveolens	Anethum graveolens L.	47	SEED (Fruit)	sperma (disseccare)	sperm (to decrease)	INT	ANDR
III_062	Apiaceae Lindl.	Anethum graveolens	Anethum graveolens L.	47	SEED (Fruit)	corpo (ristagnare)	diarrhoea (to check)	INT	GA.DI
III_062	Apiaceae Lindl.	Anethum graveolens	Anethum graveolens L.	47	SEED (Fruit)	corpo; dolori del (levare)	abdominal pain (to alleviate)	INT	GA.FU
III_062	Apiaceae Lindl.	Anethum graveolens	Anethum graveolens L.	47	SEED (Fruit)	singhiozzo (alleggerire)	hiccup (to alleviate)	INT	GA.FU
III_062	Apiaceae Lindl.	Anethum graveolens	Anethum graveolens L.	47	SEED (Fruit)	vomiti (ristagnare)	vomiting (to check)	INT	GA.FU
III_062	Apiaceae Lindl.	Anethum graveolens	Anethum graveolens L.	47	SEED (Fruit)	latte (fare ritornare)	lactation (to restore)	INT	GY.BR
III_062	Apiaceae Lindl.	Anethum graveolens	Anethum graveolens L.	47	SEED (Fruit)	madrice; per li difetti della	uterine conditions	EXT	GY.UT
III_062	Apiaceae Lindl.	Anethum graveolens	Anethum graveolens L.	47	SEED (Fruit)	orina (provocare)	diuretic	INT	UR.DI
IV_135	Plantaginaceae Juss.	Antirrhinum sp.	Antirrhinum majus L.	451	FLOW	medicamenti nocivi; contrario à i	noxious medicaments; against	EXT	SK.AB
IV_135	Plantaginaceae Juss.	Antirrhinum sp.	Antirrhinum majus L.	451	FLOW	venefici; contrario à i	antidote	EXT	SK.AB
III_069	Apiaceae Lindl.	Apium graveolens	Apium graveolens L.	281	LEAF	veleni; contraria à i	poisons	INT	ANTI
III_069	Apiaceae Lindl.	Apium graveolens	Apium graveolens L.	281	LEAF	occhi; infiammagioni de gli	eye inflammations	EXT	EYES
III_069	Apiaceae Lindl.	Apium graveolens	Apium graveolens L.	281	LEAF	cibo	food	INT	FOOD
III_069	Apiaceae Lindl.	Apium graveolens	Apium graveolens L.	281	LEAF	corpo (ristagnare)	diarrhoea (to check)	INT	GA.DI
III_069	Apiaceae Lindl.	Apium graveolens	Apium graveolens L.	281	LEAF	stomaco; ardori dello (mitigare)	heat in the stomach (to mitigate)	INT	GA.FU
III_069	Apiaceae Lindl.	Apium graveolens	Apium graveolens L.	281	LEAF	vomito (provocare)	emetic	INT	GA.PL
III_069	Apiaceae Lindl.	Apium graveolens	Apium graveolens L.	281	LEAF	poppe; durezze delle causate dal latte appreso (risolvere)	breast engorgement (to dissolve)	INT	GY.BR
III_069	Apiaceae Lindl.	Apium graveolens	Apium graveolens L.	281	LEAF	fare orinare	diuretic	INT	UR.DI
III_069	Apiaceae Lindl.	Apium graveolens	Apium graveolens L.	283	SEED (Fruit)	spuma dell'argento; à coloro che havessero bevuta la	antidote (silver foam)	INT	ANTI
III_069	Apiaceae Lindl.	Apium graveolens	Apium graveolens L.	283	SEED (Fruit)	theriache	theriac	INT	ANTI
III_069	Apiaceae Lindl.	Apium graveolens	Apium graveolens L.	283	SEED (Fruit)	veleni delle serpi	snake venoms	INT	ANTI
III_069	Apiaceae Lindl.	Apium graveolens	Apium graveolens L.	283	SEED (Fruit)	dolori (mitigare)	pain (to mitigate)	INT	NS.PA
III_069	Apiaceae Lindl.	Apium graveolens	Apium graveolens L.	283	SEED (Fruit)	tosse	cough	INT	RE.CO
III_069	Apiaceae Lindl.	Apium graveolens	Apium graveolens L.	283	SEED (Fruit)	orina (provocare)	diuretic	INT	UR.DI
III_069	Apiaceae Lindl.	Apium graveolens	Apium graveolens L.	282	SUBT	veleni; contraria à i	poisons	INT	ANTI
III_069	Apiaceae Lindl.	Apium graveolens	Apium graveolens L.	282	SUBT	corpo (ristagnare)	diarrhoea (to check)	INT	GA.DI
III_069	Apiaceae Lindl.	Apium graveolens	Apium graveolens L.	282	SUBT	vomito (provocare)	emetic	INT	GA.PL
I_021	Thymelaeaceae Juss.	Aquilaria sp.	Aquilaria sp.	12	WOOD	disenteria	dysentery	INT	GA.DI
I_021	Thymelaeaceae Juss.	Aquilaria sp.	Aquilaria sp.	12	WOOD	corpo; dolori del	abdominal pain	INT	GA.FU
I_021	Thymelaeaceae Juss.	Aquilaria sp.	Aquilaria sp.	12	WOOD	stomaco; ardore dello (mitigare)	heat in the stomach (to mitigate)	INT	GA.FU
I_021	Thymelaeaceae Juss.	Aquilaria sp.	Aquilaria sp.	12	WOOD	fegato; dolori del	liver pain	INT	GA.LI
I_021	Thymelaeaceae Juss.	Aquilaria sp.	Aquilaria sp.	12	WOOD	bocca (lavare)	mouthwash	EXT	MOUTH
IV_109	Asteraceae Bercht. & J.Presl	Arctium sp.	Arctium lappa L.	604	LEAF	ulcere antiche	chronic ulcers	EXT	SK.UL
IV_109	Asteraceae Bercht. & J.Presl	Arctium sp.	Arctium lappa L.	582	SUBT	giunture; dolori dei legamenti delle	joint pain (ligament)	EXT	MU.EX
IV_109	Asteraceae Bercht. & J.Presl	Arctium sp.	Arctium lappa L.	582	SUBT	sputi della marcia	coughing up pus	INT	RE.CO
II_158	Araceae Juss.	Arisarum vulgare	Arisarum vulgare O.Targ.Tozz.	212	SUBT	fistole; contra le	fistula (eye)	EXT	EYES
II_158	Araceae Juss.	Arisarum vulgare	Arisarum vulgare O.Targ.Tozz.	212	SUBT	ulcere, che mangiano (fermare)	spreading ulcers (to stop)	EXT	SK.UL
III_004	Aristolochiaceae Juss.	Aristolochia sp.	Aristolochia rotunda L.	238	SUBT	serpenti (contra)	snakes (against)	INT	ANTI
III_004	Aristolochiaceae Juss.	Aristolochia sp.	Aristolochia rotunda L.	238	SUBT	veleni; contra à i	poisons	INT	ANTI
III_004	Aristolochiaceae Juss.	Aristolochia sp.	Aristolochia rotunda L.	238	SUBT	febbri; freddo, che viene nel principio delle	shivering at the beginning of fevers	INT	FEVE
III_004	Aristolochiaceae Juss.	Aristolochia sp.	Aristolochia rotunda L.	238	SUBT	singhiozzo	hiccup	INT	GA.FU
III_004	Aristolochiaceae Juss.	Aristolochia sp.	Aristolochia rotunda L.	238	SUBT	madrice; superfluità della (provocare)	parturient uterine matter (to induce expulsion)	CLY	GY.AE
III_004	Aristolochiaceae Juss.	Aristolochia sp.	Aristolochia rotunda L.	238	SUBT	mestrui (provocare)	menstruation (to induce)	CLY	GY.AE
III_004	Aristolochiaceae Juss.	Aristolochia sp.	Aristolochia rotunda L.	238	SUBT	parto (provocare)	delivery (to induce)	CLY	GY.AE
III_004	Aristolochiaceae Juss.	Aristolochia sp.	Aristolochia rotunda L.	238	SUBT	secondine (provocare)	placenta (to promote expulsion)	CLY	GY.AE
III_004	Aristolochiaceae Juss.	Aristolochia sp.	Aristolochia rotunda L.	238	SUBT	donne di parto; alle (aiutare)	postpartum women (to help)	INT	GY.OT
III_004	Aristolochiaceae Juss.	Aristolochia sp.	Aristolochia rotunda L.	238	SUBT	gengive (mondificare)	gums (to cleanse)	EXT	MOUTH
III_004	Aristolochiaceae Juss.	Aristolochia sp.	Aristolochia rotunda L.	238	SUBT	gengive & denti (mondificare)	gums & teeth (to cleanse)	EXT	MOUTH
III_004	Aristolochiaceae Juss.	Aristolochia sp.	Aristolochia rotunda L.	238	SUBT	spasimati	spastics	INT	MU.IN
III_004	Aristolochiaceae Juss.	Aristolochia sp.	Aristolochia rotunda L.	238	SUBT	costato; dolori del	side stitch	INT	NS.PA
III_004	Aristolochiaceae Juss.	Aristolochia sp.	Aristolochia rotunda L.	238	SUBT	petto; stretti di	dyspnoea	INT	RE.BD
III_004	Aristolochiaceae Juss.	Aristolochia sp.	Aristolochia rotunda L.	238	SUBT	ulcere concave (riempire)	concave ulcers (to fill)	EXT	SK.UL
III_004	Aristolochiaceae Juss.	Aristolochia sp.	Aristolochia rotunda L.	238	SUBT	ulcere serpiginose (fermare)	creeping ulcers (to stop)	EXT	SK.UL
III_004	Aristolochiaceae Juss.	Aristolochia sp.	Aristolochia rotunda L.	238	SUBT	ulcere sordide (mondificare)	filthy ulcers (to cleanse)	EXT	SK.UL
III_004	Aristolochiaceae Juss.	Aristolochia sp.	Aristolochia rotunda L.	238	SUBT	spine, saette & scheggie dell'ossa (cavare fuori)	spines, arrows & bone splinters (to pull out)	EXT	SK.WO
III_004	Aristolochiaceae Juss.	Aristolochia sp.	Aristolochia rotunda L.	238	SUBT	milza	spleen	INT	SPLE
III_026	Asteraceae Bercht. & J.Presl	Artemisia abrotanum	Artemisia abrotanum L.	45	SEED (Fruit)	punture dei phalangi (ragno)	venomous spider stings	INT	ANTI
III_026	Asteraceae Bercht. & J.Presl	Artemisia abrotanum	Artemisia abrotanum L.	45	SEED (Fruit)	scorpioni; punture de gli	scorpion stings	INT	ANTI
III_026	Asteraceae Bercht. & J.Presl	Artemisia abrotanum	Artemisia abrotanum L.	45	SEED (Fruit)	serpi; morsi delle	snake bites	INT	ANTI
III_026	Asteraceae Bercht. & J.Presl	Artemisia abrotanum	Artemisia abrotanum L.	45	SEED (Fruit)	veleni mortiferi; à i	deadly poisons	INT	ANTI
III_026	Asteraceae Bercht. & J.Presl	Artemisia abrotanum	Artemisia abrotanum L.	45	SEED (Fruit)	occhi; infiammagioni de gli	eye inflammations	EXT	EYES
III_026	Asteraceae Bercht. & J.Presl	Artemisia abrotanum	Artemisia abrotanum L.	45	SEED (Fruit)	febbri; tremore delle	fever tremors	EXT	FEVE
III_026	Asteraceae Bercht. & J.Presl	Artemisia abrotanum	Artemisia abrotanum L.	45	SEED (Fruit)	mestrui ritenuti (provocare)	retained menstrual discharge (to draw out)	INT	GY.AE
III_026	Asteraceae Bercht. & J.Presl	Artemisia abrotanum	Artemisia abrotanum L.	45	SEED (Fruit)	rotti e spasimati; à i	for the ruptured and the spastics	INT	MU.IN
III_026	Asteraceae Bercht. & J.Presl	Artemisia abrotanum	Artemisia abrotanum L.	45	SEED (Fruit)	sciatiche	sciatica	INT	NS.SC
III_026	Asteraceae Bercht. & J.Presl	Artemisia abrotanum	Artemisia abrotanum L.	45	SEED (Fruit)	asmatici	asthmatics	INT	RE.BD
III_026	Asteraceae Bercht. & J.Presl	Artemisia abrotanum	Artemisia abrotanum L.	45	SEED (Fruit)	petto; stretti di	dyspnoea	INT	RE.BD
III_026	Asteraceae Bercht. & J.Presl	Artemisia abrotanum	Artemisia abrotanum L.	45	SEED (Fruit)	serpenti (fare fuggire)	snakes (to repel)	FUMI	REPE
III_026	Asteraceae Bercht. & J.Presl	Artemisia abrotanum	Artemisia abrotanum L.	45	SEED (Fruit)	tumori piccioli (risolvere)	small tumours (to dissolve)	EXT	SK.OT
III_026	Asteraceae Bercht. & J.Presl	Artemisia abrotanum	Artemisia abrotanum L.	45	SEED (Fruit)	orina; alle passioni d'	painful urination	INT	UR.OT
III_024	Asteraceae Bercht. & J.Presl	Artemisia absinthium	Artemisia absinthium L.	248	HERB	antidoti contra l'ixia	antidote	INT	ANTI
III_024	Asteraceae Bercht. & J.Presl	Artemisia absinthium	Artemisia absinthium L.	248	HERB	antidoti contra la cicuta	antidote	INT	ANTI
III_024	Asteraceae Bercht. & J.Presl	Artemisia absinthium	Artemisia absinthium L.	248	HERB	funghi malefichi; contra à i	antidote (mushrooms)	INT	ANTI
III_024	Asteraceae Bercht. & J.Presl	Artemisia absinthium	Artemisia absinthium L.	248	HERB	morso del drago marino; contra il	stingray puncture	INT	ANTI
III_024	Asteraceae Bercht. & J.Presl	Artemisia absinthium	Artemisia absinthium L.	248	HERB	morso del topo ragno; contra il	shrew bite	INT	ANTI
III_024	Asteraceae Bercht. & J.Presl	Artemisia absinthium	Artemisia absinthium L.	248	HERB	precordij; alli (conferire)	precordial chest pain	EXT	CARD
III_024	Asteraceae Bercht. & J.Presl	Artemisia absinthium	Artemisia absinthium L.	248	HERB	occhi; caligini de gli	cataract	EXT	EYES
III_024	Asteraceae Bercht. & J.Presl	Artemisia absinthium	Artemisia absinthium L.	248	HERB	occhi; dolori de gli	eye pain	EXT	EYES
III_024	Asteraceae Bercht. & J.Presl	Artemisia absinthium	Artemisia absinthium L.	248	HERB	nocumenti del crapolare (impedire)	noxiousness of overindulgence (to prevent)	INT	GA.FU
III_024	Asteraceae Bercht. & J.Presl	Artemisia absinthium	Artemisia absinthium L.	248	HERB	stomaco lungamente languido	weak stomach	EXT	GA.FU
III_024	Asteraceae Bercht. & J.Presl	Artemisia absinthium	Artemisia absinthium L.	248	HERB	stomaco; dolori dello	stomach-ache	INT	GA.FU
III_024	Asteraceae Bercht. & J.Presl	Artemisia absinthium	Artemisia absinthium L.	248	HERB	ventosità del corpo	flatulence	INT	GA.FU
III_024	Asteraceae Bercht. & J.Presl	Artemisia absinthium	Artemisia absinthium L.	248	HERB	fegato	liver	EXT	GA.LI
III_024	Asteraceae Bercht. & J.Presl	Artemisia absinthium	Artemisia absinthium L.	248	HERB	trabocco di fiele	Overflow of bile (jaundice)	INT	GA.LI
III_024	Asteraceae Bercht. & J.Presl	Artemisia absinthium	Artemisia absinthium L.	248	HERB	mestrui (provocare)	menstruation (to induce)	CLY	GY.AE
III_024	Asteraceae Bercht. & J.Presl	Artemisia absinthium	Artemisia absinthium L.	248	HERB	lividi	bruises	EXT	MU.EX
III_024	Asteraceae Bercht. & J.Presl	Artemisia absinthium	Artemisia absinthium L.	248	HERB	dolore dei denti	toothache	FUMI	NS.PA
III_024	Asteraceae Bercht. & J.Presl	Artemisia absinthium	Artemisia absinthium L.	248	HERB	orecchie; dolori delle	earache	FUMI	NS.PA
III_024	Asteraceae Bercht. & J.Presl	Artemisia absinthium	Artemisia absinthium L.	248	HERB	pulici (cacciare via)	fleas (to drive out)	EXT	PARA
III_024	Asteraceae Bercht. & J.Presl	Artemisia absinthium	Artemisia absinthium L.	248	HERB	schirantia	angina (diphtheria)	EXT	RE.OT
III_024	Asteraceae Bercht. & J.Presl	Artemisia absinthium	Artemisia absinthium L.	248	HERB	tignuole; le vesti dalle (conservare)	moths (to repel)	FUMI	REPE
III_024	Asteraceae Bercht. & J.Presl	Artemisia absinthium	Artemisia absinthium L.	248	HERB	topi, che rodano i libri (prohibire)	mice (to repel)	EXT	REPE
III_024	Asteraceae Bercht. & J.Presl	Artemisia absinthium	Artemisia absinthium L.	248	HERB	epinittidi	pustules	EXT	SK.IF
III_024	Asteraceae Bercht. & J.Presl	Artemisia absinthium	Artemisia absinthium L.	248	HERB	orecchie, che menano	ear infection	EXT	SK.IF
III_024	Asteraceae Bercht. & J.Presl	Artemisia absinthium	Artemisia absinthium L.	248	HERB	milza; difetti della	spleen defects	EXT	SPLE
III_024	Asteraceae Bercht. & J.Presl	Artemisia absinthium	Artemisia absinthium L.	248	HERB	hidropici	dropsy	EXT	UR.DI
III_024	Asteraceae Bercht. & J.Presl	Artemisia absinthium	Artemisia absinthium L.	248	HERB	orina (provocare)	diuretic	INT	UR.DI
III_121	Asteraceae Bercht. & J.Presl	Artemisia arborescens	Artemisia arborescens L.	333	FLOW	mestrui (provocare)	menstruation (to induce)	INT	GY.AE
III_121	Asteraceae Bercht. & J.Presl	Artemisia arborescens	Artemisia arborescens L.	333	FLOW	parto (provocare)	delivery (to induce)	INT	GY.AE
III_121	Asteraceae Bercht. & J.Presl	Artemisia arborescens	Artemisia arborescens L.	333	FLOW	secondine (provocare)	placenta (to promote expulsion)	INT	GY.AE
III_121	Asteraceae Bercht. & J.Presl	Artemisia arborescens	Artemisia arborescens L.	333	FLOW	madrice; alle infiammagioni della	inflammation of the uterus	INT	GY.UT
III_121	Asteraceae Bercht. & J.Presl	Artemisia arborescens	Artemisia arborescens L.	333	FLOW	madrice; per li difetti della	uterine conditions	INT	GY.UT
III_121	Asteraceae Bercht. & J.Presl	Artemisia arborescens	Artemisia arborescens L.	333	FLOW	pietre (rompere)	urinary calculi (to crush)	INT	UR.CA
III_121	Asteraceae Bercht. & J.Presl	Artemisia arborescens	Artemisia arborescens L.	333	FLOW	orina (provocare)	diuretic	INT	UR.DI
III_121	Asteraceae Bercht. & J.Presl	Artemisia arborescens	Artemisia arborescens L.	332	HERB	mestrui (provocare)	menstruation (to induce)	EXT	GY.AE
III_121	Asteraceae Bercht. & J.Presl	Artemisia arborescens	Artemisia arborescens L.	332	HERB	mestrui (provocare)	menstruation (to induce)	CLY	GY.AE
III_121	Asteraceae Bercht. & J.Presl	Artemisia arborescens	Artemisia arborescens L.	332	HERB	parto (provocare)	delivery (to induce)	EXT	GY.AE
III_121	Asteraceae Bercht. & J.Presl	Artemisia arborescens	Artemisia arborescens L.	332	HERB	parto (provocare)	delivery (to induce)	CLY	GY.AE
III_121	Asteraceae Bercht. & J.Presl	Artemisia arborescens	Artemisia arborescens L.	332	HERB	secondine (provocare)	placenta (to promote expulsion)	EXT	GY.AE
III_121	Asteraceae Bercht. & J.Presl	Artemisia arborescens	Artemisia arborescens L.	332	HERB	secondine (provocare)	placenta (to promote expulsion)	CLY	GY.AE
III_121	Asteraceae Bercht. & J.Presl	Artemisia arborescens	Artemisia arborescens L.	332	HERB	madrice; alle infiammagioni della	inflammation of the uterus	EXT	GY.UT
III_121	Asteraceae Bercht. & J.Presl	Artemisia arborescens	Artemisia arborescens L.	332	HERB	madrice; per li difetti della	uterine conditions	EXT	GY.UT
III_121	Asteraceae Bercht. & J.Presl	Artemisia arborescens	Artemisia arborescens L.	332	HERB	pietre (rompere)	urinary calculi (to crush)	INT	UR.CA
III_121	Asteraceae Bercht. & J.Presl	Artemisia arborescens	Artemisia arborescens L.	332	HERB	orina (provocare)	diuretic	INT	UR.DI
III_025	Asteraceae Bercht. & J.Presl	Artemisia herba-alba	Artemisia herba-alba Asso	249	HERB	corpo (solvere leggiermente)	belly (to purge lightly)	INT	GA.PL
III_025	Asteraceae Bercht. & J.Presl	Artemisia herba-alba	Artemisia herba-alba Asso	249	HERB	vermini tanto larghi del corpo (ammazzare & cacciare fuori)	very large intestinal worms (to kill & drive out)	INT	GA.PL
II_157	Araceae Juss.	Arum sp.	Arum maculatum L.	211	LEAF	cibo	food	INT	FOOD
II_157	Araceae Juss.	Arum sp.	Arum maculatum L.	211	LEAF	morsi dalle vipere	bites of vipers	EXT	SK.AB
II_157	Araceae Juss.	Arum sp.	Arum maculatum L.	211	LEAF	vitiligini (spegnere)	vitiligo (to remove)	EXT	SK.CO
II_157	Araceae Juss.	Arum sp.	Arum maculatum L.	211	LEAF	bugance	chilblains on hands and feet	EXT	SK.IN
II_157	Araceae Juss.	Arum sp.	Arum maculatum L.	211	LEAF	ferite fresche	fresh wounds	EXT	SK.WO
II_157	Araceae Juss.	Arum sp.	Arum maculatum L.	209	SEED (Fruit)	fare sconciare	to abort	INT	GY.AE
II_157	Araceae Juss.	Arum sp.	Arum maculatum L.	209	SEED (Fruit)	polipi (stirpare fuori)	polyps (to remove)	EXT	NOSE
II_157	Araceae Juss.	Arum sp.	Arum maculatum L.	209	SEED (Fruit)	orecchie; dolori delle	earache	EXT	NS.PA
II_157	Araceae Juss.	Arum sp.	Arum maculatum L.	209	SEED (Fruit)	orecchie; dolori delle (mitigare)	earache (to mitigate)	EXT	NS.PA
II_157	Araceae Juss.	Arum sp.	Arum maculatum L.	209	SEED (Fruit)	cancheri (fermare)	tumours (to stop)	EXT	SK.OT
II_157	Araceae Juss.	Arum sp.	Arum maculatum L.	210	SUBT	occhi; caligini de gli	cataract	EXT	EYES
II_157	Araceae Juss.	Arum sp.	Arum maculatum L.	210	SUBT	occhi; fiocchi de gli	visual impairments	EXT	EYES
II_157	Araceae Juss.	Arum sp.	Arum maculatum L.	210	SUBT	occhi; medicine de gli	eye medicine	EXT	EYES
II_157	Araceae Juss.	Arum sp.	Arum maculatum L.	210	SUBT	occhi; nuvolette de gli	blurred vision	EXT	EYES
II_157	Araceae Juss.	Arum sp.	Arum maculatum L.	210	SUBT	cibo	food	INT	FOOD
II_157	Araceae Juss.	Arum sp.	Arum maculatum L.	210	SUBT	podagre	gout	EXT	GOUT
II_157	Araceae Juss.	Arum sp.	Arum maculatum L.	210	SUBT	creatura nella madrice (tirare fuori)	embryo/foetus (to expel)	CLY	GY.AE
II_157	Araceae Juss.	Arum sp.	Arum maculatum L.	210	SUBT	fare partorire	to induce labour	CLY	GY.AE
II_157	Araceae Juss.	Arum sp.	Arum maculatum L.	210	SUBT	fare sconciare	to abort	FUMI	GY.AE
II_157	Araceae Juss.	Arum sp.	Arum maculatum L.	210	SUBT	appetiti venerei (accendere)	aphrodisiac	INT	LIBI
II_157	Araceae Juss.	Arum sp.	Arum maculatum L.	210	SUBT	appetiti venerei (muovere)	aphrodisiac	INT	LIBI
II_157	Araceae Juss.	Arum sp.	Arum maculatum L.	210	SUBT	rotti e spasimati; à i	for the ruptured and the spastics	INT	MU.IN
II_157	Araceae Juss.	Arum sp.	Arum maculatum L.	210	SUBT	polipi (stirpare)	polyps (to remove)	EXT	NOSE
II_157	Araceae Juss.	Arum sp.	Arum maculatum L.	210	SUBT	asmatici	asthmatics	INT	RE.BD
II_157	Araceae Juss.	Arum sp.	Arum maculatum L.	210	SUBT	catarri	catarrhs	INT	RE.CO
II_157	Araceae Juss.	Arum sp.	Arum maculatum L.	210	SUBT	catarri, che discendono dal capo; à i	catarrhs descending from the head	INT	RE.CO
II_157	Araceae Juss.	Arum sp.	Arum maculatum L.	210	SUBT	petto; sputo de gli humori del (facilitare)	expectoration (to facilitate)	INT	RE.CO
II_157	Araceae Juss.	Arum sp.	Arum maculatum L.	210	SUBT	tosse	cough	INT	RE.CO
II_157	Araceae Juss.	Arum sp.	Arum maculatum L.	210	SUBT	morsi dalle vipere	bites of vipers	EXT	SK.AB
II_157	Araceae Juss.	Arum sp.	Arum maculatum L.	210	SUBT	vitiligini (spegnere)	vitiligo (to remove)	EXT	SK.CO
II_157	Araceae Juss.	Arum sp.	Arum maculatum L.	210	SUBT	fistole (lavare)	fistula (to clean)	EXT	SK.IF
II_157	Araceae Juss.	Arum sp.	Arum maculatum L.	210	SUBT	fistole (medicare)	fistula (to medicate)	EXT	SK.IF
II_157	Araceae Juss.	Arum sp.	Arum maculatum L.	210	SUBT	cancheri (stirpare)	tumours (to extirpate)	EXT	SK.OT
II_157	Araceae Juss.	Arum sp.	Arum maculatum L.	210	SUBT	ulcere maligne & corrosive (purgare)	malignant & creeping ulcers (to purge)	EXT	SK.UL
II_157	Araceae Juss.	Arum sp.	Arum maculatum L.	210	SUBT	fare orinare	diuretic	INT	UR.DI
I_095a	Poaceae Barnhart	Arundo donax	Arundo donax L.	73	LEAF	erisipile & altre infiammagioni (medicare)	erysipelas & other inflammations (to medicate)	EXT	SK.IF
I_095a	Poaceae Barnhart	Arundo donax	Arundo donax L.	71	SUBT	dislogagioni (mitigare)	joint dislocation (to mitigate)	EXT	MU.EX
I_095a	Poaceae Barnhart	Arundo donax	Arundo donax L.	71	SUBT	lombi; dolori de	lower back pain	EXT	MU.EX
I_095a	Poaceae Barnhart	Arundo donax	Arundo donax L.	71	SUBT	spine & saette delle spiaghe (cavare fuori)	spines & bone splinters (to pull out)	EXT	SK.WO
I_009	Aristolochiaceae Juss.	Asarum europaeum	Asarum europaeum L.	7	SUBT	mestrui (provocare)	menstruation (to induce)	INT	GY.AE
I_009	Aristolochiaceae Juss.	Asarum europaeum	Asarum europaeum L.	7	SUBT	sciatiche	sciatica	INT	NS.SC
I_009	Aristolochiaceae Juss.	Asarum europaeum	Asarum europaeum L.	7	SUBT	hidropici	dropsy	INT	UR.DI
I_009	Aristolochiaceae Juss.	Asarum europaeum	Asarum europaeum L.	7	SUBT	orina (provocare)	diuretic	INT	UR.DI
II_114	Asparagaceae Juss.	Asparagus sp.	Asparagus sp.	169	HERB	cibo (mollificare il corpo)	food (to soften the belly)	INT	FOOD
II_114	Asparagaceae Juss.	Asparagus sp.	Asparagus sp.	169	HERB	disenteria	dysentery	INT	GA.DI
II_114	Asparagaceae Juss.	Asparagus sp.	Asparagus sp.	169	HERB	corpo (mollificare)	belly (to soften)	INT	GA.PL
II_114	Asparagaceae Juss.	Asparagus sp.	Asparagus sp.	169	HERB	fare orinare	diuretic	INT	UR.DI
II_114	Asparagaceae Juss.	Asparagus sp.	Asparagus sp.	169	HERB	orina ritenuta	diuresis (to promote)	INT	UR.DI
II_114	Asparagaceae Juss.	Asparagus sp.	Asparagus sp.	169	HERB	reni; dolori delle (levare)	kidney pain (to stop)	INT	UR.OT
II_114	Asparagaceae Juss.	Asparagus sp.	Asparagus sp.	171	SEED	dolore dei denti	toothache	EXT	NS.PA
II_114	Asparagaceae Juss.	Asparagus sp.	Asparagus sp.	171	SEED	sciatiche	sciatica	INT	NS.SC
II_114	Asparagaceae Juss.	Asparagus sp.	Asparagus sp.	171	SEED	ammazzare cani	to kill dogs	INT	POIS
II_114	Asparagaceae Juss.	Asparagus sp.	Asparagus sp.	171	SEED	fare orinare	diuretic	INT	UR.DI
II_114	Asparagaceae Juss.	Asparagus sp.	Asparagus sp.	171	SEED	orina ritenuta	diuretic	INT	UR.DI
II_114	Asparagaceae Juss.	Asparagus sp.	Asparagus sp.	171	SEED	reni; malattie delle	kidney diseases	INT	UR.OT
II_114	Asparagaceae Juss.	Asparagus sp.	Asparagus sp.	171	SEED	phalangi; à i morsi dei	venomous spider bites	INT	ANTI
II_114	Asparagaceae Juss.	Asparagus sp.	Asparagus sp.	171	SEED	cibo (mollificare il corpo)	food (to soften the belly)	INT	FOOD
II_114	Asparagaceae Juss.	Asparagus sp.	Asparagus sp.	171	SEED	trabocco di fiele	Overflow of bile (jaundice)	INT	GA.LI
II_114	Asparagaceae Juss.	Asparagus sp.	Asparagus sp.	171	SEED	corpo (mollificare)	belly (to soften)	INT	GA.PL
II_114	Asparagaceae Juss.	Asparagus sp.	Asparagus sp.	170	SUBT	sterilizare maschi	male sterilization	INT	ANDR
II_114	Asparagaceae Juss.	Asparagus sp.	Asparagus sp.	170	SUBT	phalangi; à i morsi dei	venomous spider bites	INT	ANTI
II_114	Asparagaceae Juss.	Asparagus sp.	Asparagus sp.	170	SUBT	trabocco di fiele	Overflow of bile (jaundice)	INT	GA.LI
II_114	Asparagaceae Juss.	Asparagus sp.	Asparagus sp.	170	SUBT	fare sterile	to make sterile	INT	GY.OT
II_114	Asparagaceae Juss.	Asparagus sp.	Asparagus sp.	170	SUBT	membri smossi	joint dislocations	INT	MU.IN
II_114	Asparagaceae Juss.	Asparagus sp.	Asparagus sp.	170	SUBT	dolore dei denti	toothache	EXT	NS.PA
II_114	Asparagaceae Juss.	Asparagus sp.	Asparagus sp.	170	SUBT	sciatiche	sciatica	INT	NS.SC
II_114	Asparagaceae Juss.	Asparagus sp.	Asparagus sp.	170	SUBT	sciatiche; dolori delle (medicare)	sciatic pain (to medicate)	INT	NS.SC
II_114	Asparagaceae Juss.	Asparagus sp.	Asparagus sp.	170	SUBT	orina ritenuta	diuretic	INT	UR.DI
II_114	Asparagaceae Juss.	Asparagus sp.	Asparagus sp.	170	SUBT	orinare; dolori dell'	painful urination	INT	UR.OT
II_114	Asparagaceae Juss.	Asparagus sp.	Asparagus sp.	170	SUBT	reni; malattie delle	kidney diseases	INT	UR.OT
II_159	Asphodelaceae Juss.	Asphodelus sp.	Asphodelus ramosus L.	215	FLOW	scolopendra; à i veleni della	venom (scolopendra)	INT	ANTI
II_159	Asphodelaceae Juss.	Asphodelus sp.	Asphodelus ramosus L.	215	FLOW	scorpioni; à i veleni de gli	venom (scorpion)	INT	ANTI
II_159	Asphodelaceae Juss.	Asphodelus sp.	Asphodelus ramosus L.	215	FLOW	corpo (purgare)	belly (to purge)	INT	GA.PL
II_159	Asphodelaceae Juss.	Asphodelus sp.	Asphodelus ramosus L.	215	FLOW	morso dei serpenti	snakebites	EXT	SK.AB
II_159	Asphodelaceae Juss.	Asphodelus sp.	Asphodelus ramosus L.	214	LEAF	morso dei serpenti	snakebites	EXT	SK.AB
II_159	Asphodelaceae Juss.	Asphodelus sp.	Asphodelus ramosus L.	549	SEED	scolopendra; à i veleni della	venom (scolopendra)	INT	ANTI
II_159	Asphodelaceae Juss.	Asphodelus sp.	Asphodelus ramosus L.	549	SEED	scorpioni; à i veleni de gli	venom (scorpion)	INT	ANTI
II_159	Asphodelaceae Juss.	Asphodelus sp.	Asphodelus ramosus L.	549	SEED	corpo (purgare)	belly (to purge)	INT	GA.PL
II_159	Asphodelaceae Juss.	Asphodelus sp.	Asphodelus ramosus L.	213	SUBT	serpenti; morso dei	snake bites	INT	ANTI
II_159	Asphodelaceae Juss.	Asphodelus sp.	Asphodelus ramosus L.	213	SUBT	orecchie; sordità delle	deafness	EXT	EARS
II_159	Asphodelaceae Juss.	Asphodelus sp.	Asphodelus ramosus L.	213	SUBT	occhi; medicine de gli	eye medicine	EXT	EYES
II_159	Asphodelaceae Juss.	Asphodelus sp.	Asphodelus ramosus L.	213	SUBT	vomitare (fare)	vomiting (to induce)	INT	GA.PL
II_159	Asphodelaceae Juss.	Asphodelus sp.	Asphodelus ramosus L.	213	SUBT	mestrui (provocare)	menstruation (to induce)	INT	GY.AE
II_159	Asphodelaceae Juss.	Asphodelus sp.	Asphodelus ramosus L.	213	SUBT	poppe; alle infiammagioni delle	inflammations of breasts	EXT	GY.BR
II_159	Asphodelaceae Juss.	Asphodelus sp.	Asphodelus ramosus L.	213	SUBT	rotti e spasimati; à i	for the ruptured and the spastics	INT	MU.IN
II_159	Asphodelaceae Juss.	Asphodelus sp.	Asphodelus ramosus L.	213	SUBT	costato; dolori del (medicare)	side stitch (to medicate)	INT	NS.PA
II_159	Asphodelaceae Juss.	Asphodelus sp.	Asphodelus ramosus L.	213	SUBT	dolore dei denti	toothache	EXT	NS.PA
II_159	Asphodelaceae Juss.	Asphodelus sp.	Asphodelus ramosus L.	213	SUBT	tosse	cough	INT	RE.CO
II 159	Asphodelaceae Juss.	Asphodelus sp.	Asphodelus ramosus L.	213	SUBT	morso de serpenti	snakebites	EXT	SK.AB
II_159	Asphodelaceae Juss.	Asphodelus sp.	Asphodelus ramosus L.	213	SUBT	vitiligini (spegnere)	vitiligo (to remove)	EXT	SK.CO
II_159	Asphodelaceae Juss.	Asphodelus sp.	Asphodelus ramosus L.	213	SUBT	posteme, che nascono nelle parti carnose	abscesses that grow in fleshy parts	EXT	SK.IF
II_159	Asphodelaceae Juss.	Asphodelus sp.	Asphodelus ramosus L.	213	SUBT	cotture del fuoco	burns	EXT	SK.IN
II_159	Asphodelaceae Juss.	Asphodelus sp.	Asphodelus ramosus L.	213	SUBT	foroncoli	boils	EXT	SK.IN
II_159	Asphodelaceae Juss.	Asphodelus sp.	Asphodelus ramosus L.	213	SUBT	infiammagioni; alle novelle	fresh inflammations	EXT	SK.IN
II_159	Asphodelaceae Juss.	Asphodelus sp.	Asphodelus ramosus L.	213	SUBT	testicoli; infiammagione de	scrotal inflammation	EXT	SK.IN
II_159	Asphodelaceae Juss.	Asphodelus sp.	Asphodelus ramosus L.	213	SUBT	tumori piccioli	small tumours	EXT	SK.OT
II_159	Asphodelaceae Juss.	Asphodelus sp.	Asphodelus ramosus L.	213	SUBT	bugance ulcerate	ulcerating chilblains on hands and feet	EXT	SK.UL
II_159	Asphodelaceae Juss.	Asphodelus sp.	Asphodelus ramosus L.	213	SUBT	ulcere sordide	filthy ulcers	EXT	SK.UL
II_159	Asphodelaceae Juss.	Asphodelus sp.	Asphodelus ramosus L.	213	SUBT	ulcere sordide & quelle che mangiano	filthy and spreading ulcers	EXT	SK.UL
II_159	Asphodelaceae Juss.	Asphodelus sp.	Asphodelus ramosus L.	213	SUBT	orina (provocare)	diuretic	INT	UR.DI
III_145	Aspleniaceae Newman	Asplenium ceterach	Asplenium ceterach L.	344	LEAF	singhiozzo	hiccup	INT	GA.FU
III_145	Aspleniaceae Newman	Asplenium ceterach	Asplenium ceterach L.	344	LEAF	trabocco di fiele	Overflow of bile (jaundice)	INT	GA.LI
III_145	Aspleniaceae Newman	Asplenium ceterach	Asplenium ceterach L.	344	LEAF	sterile (fare diventare)	to make sterile	EXT	GY.OT
III_145	Aspleniaceae Newman	Asplenium ceterach	Asplenium ceterach L.	344	LEAF	milza (sminuire)	spleen (to reduce)	INT	SPLE
III_145	Aspleniaceae Newman	Asplenium ceterach	Asplenium ceterach L.	344	LEAF	vescica; pietre della (rompere)	vesical calculi (to crush)	INT	UR.CA
III_145	Aspleniaceae Newman	Asplenium ceterach	Asplenium ceterach L.	344	LEAF	distillationi dell'orina; alle	to pass water, diuretic	INT	UR.DI
III_146	Aspleniaceae Newman	Asplenium sagittatum	Asplenium sagittatum (DC.) Bange	696	LEAF	milza (sminuire)	spleen (to reduce)	INT	SPLE
III_115	Aspleniaceae Newman	Asplenium scolopendrium	Asplenium scolopendrium L.	324	LEAF	serpenti; morsi delle	snake bites	INT	ANTI
III_115	Aspleniaceae Newman	Asplenium scolopendrium	Asplenium scolopendrium L.	324	LEAF	disenteria	dysentery	INT	GA.DI
III_115	Aspleniaceae Newman	Asplenium scolopendrium	Asplenium scolopendrium L.	324	LEAF	flussi del corpo	diarrhoea	INT	GA.DI
IV_139	Aspleniaceae Newman	Asplenium trichomanes	Asplenium trichomanes L.	455	HERB	serpenti; morsi delle	snake bites	INT	ANTI
IV_139	Aspleniaceae Newman	Asplenium trichomanes	Asplenium trichomanes L.	455	HERB	corpo (ristagnare)	diarrhoea (to check)	INT	GA.DI
IV_139	Aspleniaceae Newman	Asplenium trichomanes	Asplenium trichomanes L.	455	HERB	trabocco di fiele	Overflow of bile (jaundice)	INT	GA.LI
IV_139	Aspleniaceae Newman	Asplenium trichomanes	Asplenium trichomanes L.	455	HERB	mestrui (provocare)	menstruation (to induce)	INT	GY.AE
IV_139	Aspleniaceae Newman	Asplenium trichomanes	Asplenium trichomanes L.	455	HERB	secondine (provocare)	placenta (to promote expulsion)	INT	GY.AE
IV_139	Aspleniaceae Newman	Asplenium trichomanes	Asplenium trichomanes L.	455	HERB	petto; stretti di	dyspnoea	INT	RE.BD
IV_139	Aspleniaceae Newman	Asplenium trichomanes	Asplenium trichomanes L.	455	HERB	respirano; à coloro che malagevolmente	breathing difficulties	INT	RE.BD
IV_139	Aspleniaceae Newman	Asplenium trichomanes	Asplenium trichomanes L.	455	HERB	catarro, che discende allo stomaco; per il	catarrh to the stomach	INT	RE.CO
IV_139	Aspleniaceae Newman	Asplenium trichomanes	Asplenium trichomanes L.	455	HERB	sputi del sangue (ristagnare)	bloody cough (to staunch)	INT	RE.CO
IV_139	Aspleniaceae Newman	Asplenium trichomanes	Asplenium trichomanes L.	455	HERB	morso delle serpenti	snakebites	EXT	SK.AB
IV_139	Aspleniaceae Newman	Asplenium trichomanes	Asplenium trichomanes L.	455	HERB	capelli cascati (fare rinascere)	lost hair (to let regrow)	EXT	SK.CO
IV_139	Aspleniaceae Newman	Asplenium trichomanes	Asplenium trichomanes L.	455	HERB	capelli; il cascare de i (prohibire)	hair loss (to prevent)	EXT	SK.CO
IV_139	Aspleniaceae Newman	Asplenium trichomanes	Asplenium trichomanes L.	455	HERB	farfarella (mondificare)	dandruff (to cleanse)	EXT	SK.CO
IV_139	Aspleniaceae Newman	Asplenium trichomanes	Asplenium trichomanes L.	455	HERB	scrofole (risolvere)	scrofulous swellings of glands (to dissolve)	EXT	SK.IF
IV_139	Aspleniaceae Newman	Asplenium trichomanes	Asplenium trichomanes L.	455	HERB	ulcere del capo, che menano	spreading ulcers of the head	EXT	SK.UL
IV_139	Aspleniaceae Newman	Asplenium trichomanes	Asplenium trichomanes L.	455	HERB	milza; difetti della	spleen defects	INT	SPLE
IV_139	Aspleniaceae Newman	Asplenium trichomanes	Asplenium trichomanes L.	455	HERB	pietre (rompere)	urinary calculi (to crush)	INT	UR.CA
IV_139	Aspleniaceae Newman	Asplenium trichomanes	Asplenium trichomanes L.	455	HERB	orina ritenuta	diuretic	INT	UR.DI
IV_122	Asteraceae Bercht. & J.Presl	Aster amellus	Aster amellus L.	711	LEAF	occhi; infiammagioni de gli	eye inflammations	EXT	EYES
IV_122	Asteraceae Bercht. & J.Presl	Aster amellus	Aster amellus L.	711	LEAF	stomaco; fervore dello	stomach heat	INT	GA.FU
IV_122	Asteraceae Bercht. & J.Presl	Aster amellus	Aster amellus L.	711	LEAF	mal caduco; à i fanciulli che patiscono il	epilepsy of children	INT	NS.VA
IV_122	Asteraceae Bercht. & J.Presl	Aster amellus	Aster amellus L.	711	LEAF	schirantia	angina (diphtheria)	INT	RE.OT
IV_122	Asteraceae Bercht. & J.Presl	Aster amellus	Aster amellus L.	711	LEAF	infiammagioni all'uscire del budello del sedere	inflammation of the anus	EXT	SK.IN
IV_122	Asteraceae Bercht. & J.Presl	Aster amellus	Aster amellus L.	711	LEAF	infiammagioni dell'anguinaie	inflammations of the loin	EXT	SK.IN
III_021	Fabaceae Lindl.	Astragalus gummifer	Astragalus gummifer Labill.	246	EXUD	occhi; medicine de gli	eye medicine	EXT	EYES
III_021	Fabaceae Lindl.	Astragalus gummifer	Astragalus gummifer Labill.	246	EXUD	catarro; flussi del	catarrhs	EXT	RE.CO
III_021	Fabaceae Lindl.	Astragalus gummifer	Astragalus gummifer Labill.	246	EXUD	gola; all'asprezza della	throat; roughness of the	EXT	RE.CO
III_021	Fabaceae Lindl.	Astragalus gummifer	Astragalus gummifer Labill.	246	EXUD	tosse	cough	INT	RE.CO
III_021	Fabaceae Lindl.	Astragalus gummifer	Astragalus gummifer Labill.	246	EXUD	voce fioca	weak voice	EXT	RE.OT
III_021	Fabaceae Lindl.	Astragalus gummifer	Astragalus gummifer Labill.	246	EXUD	reni; dolori delle	kidney pain	INT	UR.OT
III_021	Fabaceae Lindl.	Astragalus gummifer	Astragalus gummifer Labill.	246	EXUD	vescica; rodimenti della	bladder complaints	INT	UR.OT
III_078a	Apiaceae Lindl.	Athamanta cretensis	Athamanta cretensis L.	295	SEED (Fruit)	phalangi; à i morsi dei	venomous spider bites	INT	ANTI
III_078a	Apiaceae Lindl.	Athamanta cretensis	Athamanta cretensis L.	295	SEED (Fruit)	corpo; dolori di (togliere)	abdominal pain (to remove)	INT	GA.FU
III_078a	Apiaceae Lindl.	Athamanta cretensis	Athamanta cretensis L.	295	SEED (Fruit)	mestrui (provocare)	menstruation (to induce)	INT	GY.AE
III_078a	Apiaceae Lindl.	Athamanta cretensis	Athamanta cretensis L.	295	SEED (Fruit)	parto (provocare)	delivery (to induce)	INT	GY.AE
III_078a	Apiaceae Lindl.	Athamanta cretensis	Athamanta cretensis L.	295	SEED (Fruit)	tosse vecchia (mitigare)	chronic cough (to mitigate)	INT	RE.CO
III_078a	Apiaceae Lindl.	Athamanta cretensis	Athamanta cretensis L.	295	SEED (Fruit)	posteme (risolvere)	abscesses (to dissolve)	EXT	SK.IF
III_078a	Apiaceae Lindl.	Athamanta cretensis	Athamanta cretensis L.	295	SEED (Fruit)	orina (provocare)	diuretic	INT	UR.DI
III_078a	Apiaceae Lindl.	Athamanta cretensis	Athamanta cretensis L.	586	SUBT	velenosi animali; à i morsi	venomous animal bites	INT	ANTI
I_101	Amaranthaceae Juss.	Atriplex halimus	Atriplex halimus L.	627	LEAF	cibo	food	INT	FOOD
I_101	Amaranthaceae Juss.	Atriplex halimus	Atriplex halimus L.	79	SUBT	corpo; dolori del	abdominal pain	INT	GA.FU
I_101	Amaranthaceae Juss.	Atriplex halimus	Atriplex halimus L.	79	SUBT	latte nelle mammelle (fare abondare)	lactation (to stimulate)	INT	GY.BR
I_101	Amaranthaceae Juss.	Atriplex halimus	Atriplex halimus L.	79	SUBT	rotti e spasimati; à i	for the ruptured and the spastics	INT	MU.IN
II_110	Amaranthaceae Juss.	Atriplex hortensis	Atriplex hortensis L.	536	LEAF	cibo	food	INT	FOOD
II_110	Amaranthaceae Juss.	Atriplex hortensis	Atriplex hortensis L.	536	LEAF	corpo (mollificare)	belly (to soften)	INT	GA.PL
II_110	Amaranthaceae Juss.	Atriplex hortensis	Atriplex hortensis L.	624	SEED (Fruit)	trabocco di fiele (guarire)	Overflow of bile (to cure) (jaundice)	INT	GA.LI
IV_076	Solanaceae Juss.	Atropa bella-donna	Atropa bella-donna L.	422	SUBT	imagini di cose veramente gioconde (rappresentare all'intelletto)	hallucinations (to experience)	INT	NS.PS
IV_076	Solanaceae Juss.	Atropa bella-donna	Atropa bella-donna L.	422	SUBT	ammazzare	to kill	INT	POIS
I_015	Asteraceae Bercht. & J.Presl	Aucklandia costus	Aucklandia costus Falc.	11	SUBT	antidoti	antidote	INT	ANTI
I_015	Asteraceae Bercht. & J.Presl	Aucklandia costus	Aucklandia costus Falc.	11	SUBT	morso delle vipere	viper bite	INT	ANTI
I_015	Asteraceae Bercht. & J.Presl	Aucklandia costus	Aucklandia costus Falc.	11	SUBT	febbri; freddo, che precede alle (rimettere)	shivering that precedes fevers	INT	FEVE
I_015	Asteraceae Bercht. & J.Presl	Aucklandia costus	Aucklandia costus Falc.	11	SUBT	vermini tanto larghi del corpo (ammazzare)	very large intestinal worms (to kill)	INT	GA.PL
I_015	Asteraceae Bercht. & J.Presl	Aucklandia costus	Aucklandia costus Falc.	11	SUBT	mestrui (provocare)	menstruation (to induce)	INT	GY.AE
I_015	Asteraceae Bercht. & J.Presl	Aucklandia costus	Aucklandia costus Falc.	11	SUBT	madrice; malattie della	uterine diseases	FUMI	GY.UT
I_015	Asteraceae Bercht. & J.Presl	Aucklandia costus	Aucklandia costus Falc.	11	SUBT	madrice; malattie della	uterine diseases	CLY	GY.UT
I_015	Asteraceae Bercht. & J.Presl	Aucklandia costus	Aucklandia costus Falc.	11	SUBT	venereo (incitare)	aphrodisiac	INT	LIBI
I_015	Asteraceae Bercht. & J.Presl	Aucklandia costus	Aucklandia costus Falc.	11	SUBT	paralitici	paralyzed	INT	NS.VA
I_015	Asteraceae Bercht. & J.Presl	Aucklandia costus	Aucklandia costus Falc.	11	SUBT	petto; dolore del	chest pain	INT	RE.OT
I_015	Asteraceae Bercht. & J.Presl	Aucklandia costus	Aucklandia costus Falc.	11	SUBT	macole della pelle della faccia (spegnere)	facial blemishes (to remove)	EXT	SK.CO
I_015	Asteraceae Bercht. & J.Presl	Aucklandia costus	Aucklandia costus Falc.	11	SUBT	orina (provocare)	diuretic	INT	UR.DI
II_085	Poaceae Barnhart	Avena sativa	Avena sativa L.	141	SEED (Fruit)	corpo (ristagnare)	diarrhoea (to check)	INT	GA.DI
II_085	Poaceae Barnhart	Avena sativa	Avena sativa L.	141	SEED (Fruit)	tosse	cough	INT	RE.CO
III_111	Lamiaceae Martinov	Ballota nigra	Ballota nigra L.	321	LEAF	morso dei cani	dog bite	EXT	SK.AB
III_111	Lamiaceae Martinov	Ballota nigra	Ballota nigra L.	321	LEAF	posteme del sedere (ripercuotere)	abscesses of the buttocks (to repulse)	EXT	SK.IF
III_111	Lamiaceae Martinov	Ballota nigra	Ballota nigra L.	321	LEAF	ulcere sordide (purgare)	filthy ulcers (to purge)	EXT	SK.UL
II_116	Apiaceae Lindl.	Berula erecta	Berula erecta (Huds.) Coville	673	LEAF	disenteria	dysentery	INT	GA.DI
II_116	Apiaceae Lindl.	Berula erecta	Berula erecta (Huds.) Coville	673	LEAF	mestrui (provocare)	menstruation (to induce)	INT	GY.AE
II_116	Apiaceae Lindl.	Berula erecta	Berula erecta (Huds.) Coville	673	LEAF	parto (provocare)	delivery (to induce)	INT	GY.AE
II_116	Apiaceae Lindl.	Berula erecta	Berula erecta (Huds.) Coville	673	LEAF	pietre (rompere)	urinary calculi (to crush)	INT	UR.CA
II_116	Apiaceae Lindl.	Berula erecta	Berula erecta (Huds.) Coville	673	LEAF	fare orinare	diuretic	INT	UR.DI
II_112	Amaranthaceae Juss.	Beta vulgaris	Beta vulgaris L.	538	LEAF	lendini; il capo da (nettare)	nits (to wash away)	EXT	PARA
II_112	Amaranthaceae Juss.	Beta vulgaris	Beta vulgaris L.	538	LEAF	farfarella; il capo dalla (nettare)	dandruff (to cleanse)	EXT	SK.CO
II_112	Amaranthaceae Juss.	Beta vulgaris	Beta vulgaris L.	538	LEAF	pelagioni	hair loss	EXT	SK.CO
II_112	Amaranthaceae Juss.	Beta vulgaris	Beta vulgaris L.	538	LEAF	vitiligini	vitiligo	EXT	SK.CO
II_112	Amaranthaceae Juss.	Beta vulgaris	Beta vulgaris L.	538	LEAF	fuoco sacro	erysipelas	EXT	SK.IF
II_112	Amaranthaceae Juss.	Beta vulgaris	Beta vulgaris L.	538	LEAF	brozze (sanare)	blisters (to cure)	EXT	SK.IN
II_112	Amaranthaceae Juss.	Beta vulgaris	Beta vulgaris L.	538	LEAF	bugance (sanare)	chilblains on hands and feet (to cure)	EXT	SK.IN
II_112	Amaranthaceae Juss.	Beta vulgaris	Beta vulgaris L.	538	LEAF	cotture del fuoco	burns	EXT	SK.IN
II_112	Amaranthaceae Juss.	Beta vulgaris	Beta vulgaris L.	538	LEAF	ulcere che pascono	spreading ulcers	EXT	SK.UL
II_112	Amaranthaceae Juss.	Beta vulgaris	Beta vulgaris L.	167	SUBT	orecchie; dolori delle	earache	EXT	NS.PA
II_112	Amaranthaceae Juss.	Beta vulgaris	Beta vulgaris L.	167	SUBT	lendini; il capo da (nettare)	nits (to wash away)	EXT	PARA
II_112	Amaranthaceae Juss.	Beta vulgaris	Beta vulgaris L.	167	SUBT	farfarella; il capo dalla (nettare)	dandruff (to cleanse)	EXT	SK.CO
II_112	Amaranthaceae Juss.	Beta vulgaris	Beta vulgaris L.	167	SUBT	bugance (sanare)	chilblains on hands and feet (to cure)	EXT	SK.IN
III_117	Fabaceae Lindl.	Bituminaria bituminosa	Bituminaria bituminosa (L.) C.H.Stirt.	326	LEAF	serpenti; morso dei	snake bites	INT	ANTI
III_117	Fabaceae Lindl.	Bituminaria bituminosa	Bituminaria bituminosa (L.) C.H.Stirt.	326	LEAF	febbre terzana & quartana	tertian & quartan fever	INT	FEVE
III_117	Fabaceae Lindl.	Bituminaria bituminosa	Bituminaria bituminosa (L.) C.H.Stirt.	326	LEAF	mestrui (provocare)	menstruation (to induce)	INT	GY.AE
III_117	Fabaceae Lindl.	Bituminaria bituminosa	Bituminaria bituminosa (L.) C.H.Stirt.	326	LEAF	madrice; difetti della	uterine defects	INT	GY.UT
III_117	Fabaceae Lindl.	Bituminaria bituminosa	Bituminaria bituminosa (L.) C.H.Stirt.	326	LEAF	mal caduco	epilepsy	INT	NS.VA
III_117	Fabaceae Lindl.	Bituminaria bituminosa	Bituminaria bituminosa (L.) C.H.Stirt.	326	LEAF	pleuritici; à i	pleurisy	INT	RE.OT
III_117	Fabaceae Lindl.	Bituminaria bituminosa	Bituminaria bituminosa (L.) C.H.Stirt.	326	LEAF	dolori à coloro, che sono stati morduti dalle serpi (togliere via)	pain associated with snake bites (to remove)	EXT	SK.AB
III_117	Fabaceae Lindl.	Bituminaria bituminosa	Bituminaria bituminosa (L.) C.H.Stirt.	326	LEAF	hidropisie; nei principij dell'	early-stage dropsy	INT	UR.DI
III_117	Fabaceae Lindl.	Bituminaria bituminosa	Bituminaria bituminosa (L.) C.H.Stirt.	326	LEAF	orina ritenuta	diuretic	INT	UR.DI
III_117	Fabaceae Lindl.	Bituminaria bituminosa	Bituminaria bituminosa (L.) C.H.Stirt.	325	SEED	febbre terzana & quartana	tertian & quartan fever	INT	FEVE
III_117	Fabaceae Lindl.	Bituminaria bituminosa	Bituminaria bituminosa (L.) C.H.Stirt.	325	SEED	mestrui (provocare)	menstruation (to induce)	INT	GY.AE
III_117	Fabaceae Lindl.	Bituminaria bituminosa	Bituminaria bituminosa (L.) C.H.Stirt.	325	SEED	madrice; per li difetti della	uterine conditions	INT	GY.UT
III_117	Fabaceae Lindl.	Bituminaria bituminosa	Bituminaria bituminosa (L.) C.H.Stirt.	325	SEED	mal caduco	epilepsy	INT	NS.VA
III_117	Fabaceae Lindl.	Bituminaria bituminosa	Bituminaria bituminosa (L.) C.H.Stirt.	325	SEED	pleuritici; à i	pleurisy	INT	RE.OT
III_117	Fabaceae Lindl.	Bituminaria bituminosa	Bituminaria bituminosa (L.) C.H.Stirt.	325	SEED	hidropisie; nei principij dell'	early-stage dropsy	INT	UR.DI
III_117	Fabaceae Lindl.	Bituminaria bituminosa	Bituminaria bituminosa (L.) C.H.Stirt.	325	SEED	orina ritenuta	diuretic	INT	UR.DI
III_117	Fabaceae Lindl.	Bituminaria bituminosa	Bituminaria bituminosa (L.) C.H.Stirt.	327	SUBT	antidoti	antidote	INT	ANTI
III_117	Fabaceae Lindl.	Bituminaria bituminosa	Bituminaria bituminosa (L.) C.H.Stirt.	327	SUBT	dolori à coloro, che sono stati morduti dalle serpi (togliere via)	pain associated with snake bites (to remove)	EXT	SK.AB
IV_058	Berberidaceae Juss.	Bongardia chrysogonum	Bongardia chrysogonum (L.) Spach	576	SUBT	morso del topo ragno	shrew bite	EXT	SK.AB
I_067	Burseraceae Kunth	Boswellia sp.	Boswellia sacra Flück.	50	EXUD	occhi; caligini de gli	cataract	EXT	EYES
I_067	Burseraceae Kunth	Boswellia sp.	Boswellia sacra Flück.	50	EXUD	membra interiori	gut	INT	GA.FU
I_067	Burseraceae Kunth	Boswellia sp.	Boswellia sacra Flück.	50	EXUD	infiammagioni delle mamelle dopo'l parto	inflamed breasts after delivery	EXT	GY.BR
I_067	Burseraceae Kunth	Boswellia sp.	Boswellia sacra Flück.	50	EXUD	orecchie; percosse delle	blow on the ears (to medicate)	EXT	MU.EX
I_067	Burseraceae Kunth	Boswellia sp.	Boswellia sacra Flück.	50	EXUD	orecchie; dolori delle	earache	EXT	NS.PA
I_067	Burseraceae Kunth	Boswellia sp.	Boswellia sacra Flück.	50	EXUD	ammazzare	to kill	INT	POIS
I_067	Burseraceae Kunth	Boswellia sp.	Boswellia sacra Flück.	50	EXUD	canna del polmone	trachea	INT	RE.CO
I_067	Burseraceae Kunth	Boswellia sp.	Boswellia sacra Flück.	50	EXUD	sputi del sangue	bloody cough	INT	RE.CO
I_067	Burseraceae Kunth	Boswellia sp.	Boswellia sacra Flück.	50	EXUD	dita; panaricci della	paronychia	EXT	SK.IF
I_067	Burseraceae Kunth	Boswellia sp.	Boswellia sacra Flück.	50	EXUD	bugance (guarire)	chilblains on hands and feet (to cure)	EXT	SK.IN
I_067	Burseraceae Kunth	Boswellia sp.	Boswellia sacra Flück.	50	EXUD	ulcere del capo	ulcers of the head	EXT	SK.UL
I_067	Burseraceae Kunth	Boswellia sp.	Boswellia sacra Flück.	50	EXUD	ulcere maligne del sedere	ulcers of the buttocks	EXT	SK.UL
I_067	Burseraceae Kunth	Boswellia sp.	Boswellia sacra Flück.	50	EXUD	ulcere profonde (riempire)	deep ulcers (to fill)	EXT	SK.UL
I_067	Burseraceae Kunth	Boswellia sp.	Boswellia sacra Flück.	50	EXUD	ferite fresche (consolidare)	fresh wounds (to close)	EXT	SK.WO
II_111a	Brassicaceae Burnett	Brassica oleracea	Brassica oleracea L.	672	FLOW	donne (fare sconciare)	abortion (to induce)	CLY	GY.AE
II_111a	Brassicaceae Burnett	Brassica oleracea	Brassica oleracea L.	605	HERB	orina (provocare)	diuretic	INT	UR.DI
II_111a	Brassicaceae Burnett	Brassica oleracea	Brassica oleracea L.	537	LEAF	morso delle vipere	viper bite	INT	ANTI
II_111a	Brassicaceae Burnett	Brassica oleracea	Brassica oleracea L.	537	LEAF	vista; debolezze della	visual impairments	INT	EYES
II_111a	Brassicaceae Burnett	Brassica oleracea	Brassica oleracea L.	537	LEAF	cibo (muovere o ristagnare il corpo)	food (to advance or check)	INT	FOOD
II_111a	Brassicaceae Burnett	Brassica oleracea	Brassica oleracea L.	537	LEAF	corpo (ristagnare)	diarrhoea (to check)	INT	GA.DI
II_111a	Brassicaceae Burnett	Brassica oleracea	Brassica oleracea L.	537	LEAF	corpo (mollificare)	belly (to soften)	INT	GA.PL
II_111a	Brassicaceae Burnett	Brassica oleracea	Brassica oleracea L.	537	LEAF	corpo (muovere)	digestion (to advance)	INT	GA.PL
II_111a	Brassicaceae Burnett	Brassica oleracea	Brassica oleracea L.	537	LEAF	corpo (solvere)	belly (to purge)	INT	GA.PL
II_111a	Brassicaceae Burnett	Brassica oleracea	Brassica oleracea L.	537	LEAF	podagre; dolori delle	gout pain	EXT	GOUT
II_111a	Brassicaceae Burnett	Brassica oleracea	Brassica oleracea L.	537	LEAF	mestrui (provocare)	menstruation (to induce)	INT	GY.AE
II_111a	Brassicaceae Burnett	Brassica oleracea	Brassica oleracea L.	537	LEAF	mestrui (provocare)	menstruation (to induce)	EXT	GY.AE
II_111a	Brassicaceae Burnett	Brassica oleracea	Brassica oleracea L.	537	LEAF	giunture; dolori di	joint pain	EXT	MU.EX
II_111a	Brassicaceae Burnett	Brassica oleracea	Brassica oleracea L.	537	LEAF	capo (purgare)	head (to purge)	EXT	NOSE
II_111a	Brassicaceae Burnett	Brassica oleracea	Brassica oleracea L.	537	LEAF	nocumenti della ebbriachezza e della crapula (risolvere)	hangover	INT	NS.VA
II_111a	Brassicaceae Burnett	Brassica oleracea	Brassica oleracea L.	537	LEAF	tremore delle membra; al	tremor	INT	NS.VA
II_111a	Brassicaceae Burnett	Brassica oleracea	Brassica oleracea L.	537	LEAF	scabbia (sanare)	scabies (to cure)	EXT	PARA
II_111a	Brassicaceae Burnett	Brassica oleracea	Brassica oleracea L.	537	LEAF	voce perduta (ristaurare)	lost voice (to recover)	EXT	RE.OT
II_111a	Brassicaceae Burnett	Brassica oleracea	Brassica oleracea L.	537	LEAF	capelli, che cascano (ritenere)	hair loss (to stop)	EXT	SK.CO
II_111a	Brassicaceae Burnett	Brassica oleracea	Brassica oleracea L.	537	LEAF	cancrene	gangrene	EXT	SK.IF
II_111a	Brassicaceae Burnett	Brassica oleracea	Brassica oleracea L.	537	LEAF	carboncelli (rompere)	carbuncles (to break)	EXT	SK.IF
II_111a	Brassicaceae Burnett	Brassica oleracea	Brassica oleracea L.	537	LEAF	epinittidi (sanare)	pustules (to cure)	EXT	SK.IF
II_111a	Brassicaceae Burnett	Brassica oleracea	Brassica oleracea L.	537	LEAF	fuoco sacro (sanare)	erysipelas	EXT	SK.IF
II_111a	Brassicaceae Burnett	Brassica oleracea	Brassica oleracea L.	537	LEAF	posteme	abscesses	EXT	SK.IF
II_111a	Brassicaceae Burnett	Brassica oleracea	Brassica oleracea L.	537	LEAF	infiammagioni (risolvere)	inflammations (to dissolve)	EXT	SK.IN
II_111a	Brassicaceae Burnett	Brassica oleracea	Brassica oleracea L.	537	LEAF	ulcere sordide & vecchie	chronic & filthy ulcers	EXT	SK.UL
II_111a	Brassicaceae Burnett	Brassica oleracea	Brassica oleracea L.	537	LEAF	ulcere, che pascono	spreading ulcers	EXT	SK.UL
II_111a	Brassicaceae Burnett	Brassica oleracea	Brassica oleracea L.	537	LEAF	ferite (saldare)	wounds (to close)	EXT	SK.WO
II_111a	Brassicaceae Burnett	Brassica oleracea	Brassica oleracea L.	537	LEAF	milza; a coloro, che patiscono nella	spleen ailments	INT	SPLE
II_111a	Brassicaceae Burnett	Brassica oleracea	Brassica oleracea L.	164	SEED	antidoti theriacali	antidote (theriac)	INT	ANTI
II_111a	Brassicaceae Burnett	Brassica oleracea	Brassica oleracea L.	164	SEED	vermini del corpo (cacciare fuori)	intestinal worms (to drive out)	INT	GA.PL
II_111a	Brassicaceae Burnett	Brassica oleracea	Brassica oleracea L.	164	SEED	faccia (mondificare)	face (to cleanse)	EXT	SK.CO
II_111a	Brassicaceae Burnett	Brassica oleracea	Brassica oleracea L.	164	SEED	lentigini (spegnere)	freckles (to remove)	INT	SK.CO
II_102	Brassicaceae Burnett	Brassica rapa	Brassica rapa L.	535	HERB	orina (provocare)	diuretic	INT	UR.DI
II_103	Brassicaceae Burnett	Brassica rapa	Brassica rapa L.	155	SEED	antidoti	antidote	INT	ANTI
II_102	Brassicaceae Burnett	Brassica rapa	Brassica rapa L.	155	SEED	antidoti	antidote	INT	ANTI
II_102	Brassicaceae Burnett	Brassica rapa	Brassica rapa L.	155	SEED	theriache	theriac	INT	ANTI
II_103	Brassicaceae Burnett	Brassica rapa	Brassica rapa L.	155	SEED	veleni mortiferi; la forza de i (sminuire)	antidote	INT	ANTI
II_102	Brassicaceae Burnett	Brassica rapa	Brassica rapa L.	155	SEED	veleni; contra	antidote	INT	ANTI
II_102	Brassicaceae Burnett	Brassica rapa	Brassica rapa L.	155	SEED	cibo (fare appetito)	food (appetizer)	INT	FOOD
II_102	Brassicaceae Burnett	Brassica rapa	Brassica rapa L.	155	SEED	venere (stimolare)	aphrodisiac	INT	LIBI
II_102	Brassicaceae Burnett	Brassica rapa	Brassica rapa L.	155	SEED	dolori (levare)	pain (to alleviate)	INT	NS.PA
II_102	Brassicaceae Burnett	Brassica rapa	Brassica rapa L.	155	SEED	pelle della faccia (mondificare)	facial skin (to cleanse)	EXT	SK.CO
II_103	Brassicaceae Burnett	Brassica rapa	Brassica rapa L.	534	SUBT	cibo	food	INT	FOOD
II_102	Brassicaceae Burnett	Brassica rapa	Brassica rapa L.	534	SUBT	nutrire	food	INT	FOOD
II_102	Brassicaceae Burnett	Brassica rapa	Brassica rapa L.	534	SUBT	podagre	gout	EXT	GOUT
II_102	Brassicaceae Burnett	Brassica rapa	Brassica rapa L.	534	SUBT	venere (stimolare)	aphrodisiac	INT	LIBI
II_102	Brassicaceae Burnett	Brassica rapa	Brassica rapa L.	534	SUBT	bugance	chilblains on hands and feet	EXT	SK.IN
II_102	Brassicaceae Burnett	Brassica rapa	Brassica rapa L.	534	SUBT	bugance ulcerate	ulcerating chilblains on hands and feet	EXT	SK.UL
IV_183	Cucurbitaceae Juss.	Bryonia cretica	Bryonia cretica L.	493	FRU	cancrene corrosive	corrosive gangrene	EXT	SK.IF
IV_183	Cucurbitaceae Juss.	Bryonia cretica	Bryonia cretica L.	493	FRU	cancrene delle gambe contumaci & sordide	filthy gangrene of legs	EXT	SK.IF
IV_183	Cucurbitaceae Juss.	Bryonia cretica	Bryonia cretica L.	493	FRU	ulcere, che chiamano chironie	ulcers	EXT	SK.UL
IV_183	Cucurbitaceae Juss.	Bryonia cretica	Bryonia cretica L.	492	HERB	cibo	food	INT	FOOD
IV_183	Cucurbitaceae Juss.	Bryonia cretica	Bryonia cretica L.	492	HERB	corpo (solvere)	belly (to purge)	INT	GA.PL
IV_183	Cucurbitaceae Juss.	Bryonia cretica	Bryonia cretica L.	492	HERB	orina (provocare)	diuretic	INT	UR.DI
IV_183	Cucurbitaceae Juss.	Bryonia cretica	Bryonia cretica L.	495	LEAF	cancrene corrosive	corrosive gangrene	EXT	SK.IF
IV_183	Cucurbitaceae Juss.	Bryonia cretica	Bryonia cretica L.	495	LEAF	cancrene delle gambe contumaci & sordide	filthy gangrene of legs	EXT	SK.IF
IV_183	Cucurbitaceae Juss.	Bryonia cretica	Bryonia cretica L.	495	LEAF	ulcere, che chiamano chironie	ulcers	EXT	SK.UL
IV_183	Cucurbitaceae Juss.	Bryonia cretica	Bryonia cretica L.	607	SEED	rogna; per la	scabies	EXT	PARA
IV_183	Cucurbitaceae Juss.	Bryonia cretica	Bryonia cretica L.	607	SEED	scabbia	scabies	EXT	PARA
IV_183	Cucurbitaceae Juss.	Bryonia cretica	Bryonia cretica L.	494	SUBT	morsi delle vipere	viper bites	INT	ANTI
IV_183	Cucurbitaceae Juss.	Bryonia cretica	Bryonia cretica L.	494	SUBT	corpo (mondificare)	belly (to cleanse)	INT	GA.PL
IV_183	Cucurbitaceae Juss.	Bryonia cretica	Bryonia cretica L.	494	SUBT	creatura nel corpo (ammazzare)	embryo/foetus (to kill)	INT	GY.AE
IV_183	Cucurbitaceae Juss.	Bryonia cretica	Bryonia cretica L.	494	SUBT	fare sconciare	to abort	EXT	GY.AE
IV_183	Cucurbitaceae Juss.	Bryonia cretica	Bryonia cretica L.	494	SUBT	madrice (purgare)	uterus (to purge)	EXT	GY.AE
IV_183	Cucurbitaceae Juss.	Bryonia cretica	Bryonia cretica L.	494	SUBT	parto (provocare)	delivery (to induce)	CLY	GY.AE
IV_183	Cucurbitaceae Juss.	Bryonia cretica	Bryonia cretica L.	494	SUBT	secondine (provocare)	placenta (to promote expulsion)	CLY	GY.AE
IV_183	Cucurbitaceae Juss.	Bryonia cretica	Bryonia cretica L.	494	SUBT	latte (fare abondare)	induce lactation	INT	GY.BR
IV_183	Cucurbitaceae Juss.	Bryonia cretica	Bryonia cretica L.	494	SUBT	lividi (togliere)	bruises (to remove)	EXT	MU.EX
IV_183	Cucurbitaceae Juss.	Bryonia cretica	Bryonia cretica L.	494	SUBT	ossa rotte (cavare)	bone fragments (to remove)	EXT	MU.EX
IV_183	Cucurbitaceae Juss.	Bryonia cretica	Bryonia cretica L.	494	SUBT	spasimati & rotti; per li	for the ruptured and the spastics	EXT	MU.EX
IV_183	Cucurbitaceae Juss.	Bryonia cretica	Bryonia cretica L.	494	SUBT	costato; dolori del	side stitch	EXT	NS.PA
IV_183	Cucurbitaceae Juss.	Bryonia cretica	Bryonia cretica L.	494	SUBT	attoniti; à gli	numbness	INT	NS.VA
IV_183	Cucurbitaceae Juss.	Bryonia cretica	Bryonia cretica L.	494	SUBT	mal caduco	epilepsy	INT	NS.VA
IV_183	Cucurbitaceae Juss.	Bryonia cretica	Bryonia cretica L.	494	SUBT	vertiginosi; à i	vertigo	INT	NS.VA
IV_183	Cucurbitaceae Juss.	Bryonia cretica	Bryonia cretica L.	494	SUBT	à coloro, che sono in pericolo di strangolarsi	dyspnoea	EXT	RE.BD
IV_183	Cucurbitaceae Juss.	Bryonia cretica	Bryonia cretica L.	494	SUBT	per coloro, che malagevolmente respirano	dyspnoea	EXT	RE.BD
IV_183	Cucurbitaceae Juss.	Bryonia cretica	Bryonia cretica L.	494	SUBT	tosse	cough	EXT	RE.CO
IV_183	Cucurbitaceae Juss.	Bryonia cretica	Bryonia cretica L.	494	SUBT	cicatrici nere (spegnere)	black scars (to remove)	EXT	SK.CO
IV_183	Cucurbitaceae Juss.	Bryonia cretica	Bryonia cretica L.	494	SUBT	lentigini (spegnere)	freckles (to remove)	EXT	SK.CO
IV_183	Cucurbitaceae Juss.	Bryonia cretica	Bryonia cretica L.	494	SUBT	macole della faccia (spegnere)	facial blemishes (to remove)	EXT	SK.CO
IV_183	Cucurbitaceae Juss.	Bryonia cretica	Bryonia cretica L.	494	SUBT	pelle (fare tirare)	skin (to tighten)	EXT	SK.CO
IV_183	Cucurbitaceae Juss.	Bryonia cretica	Bryonia cretica L.	494	SUBT	quosi (spegnere)	facial blemishes (to remove)	EXT	SK.CO
IV_183	Cucurbitaceae Juss.	Bryonia cretica	Bryonia cretica L.	494	SUBT	cancrene corrosive	corrosive gangrene	EXT	SK.IF
IV_183	Cucurbitaceae Juss.	Bryonia cretica	Bryonia cretica L.	494	SUBT	cancrene delle gambe contumaci & sordide	filthy gangrene of legs	EXT	SK.IF
IV_183	Cucurbitaceae Juss.	Bryonia cretica	Bryonia cretica L.	494	SUBT	posteme (rompere)	abscesses (to break)	EXT	SK.IF
IV_183	Cucurbitaceae Juss.	Bryonia cretica	Bryonia cretica L.	494	SUBT	infiammagioni (risolvere)	inflammations (to dissolve)	EXT	SK.IN
IV_183	Cucurbitaceae Juss.	Bryonia cretica	Bryonia cretica L.	494	SUBT	dita; reduvie della (togliere via)	excrescences of the cuticle of the fingernails [eponychium] (to remove)	EXT	SK.OT
IV_183	Cucurbitaceae Juss.	Bryonia cretica	Bryonia cretica L.	494	SUBT	ulcere, che chiamano chironie	ulcers	EXT	SK.UL
IV_183	Cucurbitaceae Juss.	Bryonia cretica	Bryonia cretica L.	494	SUBT	milza (consumare)	spleen (to reduce)	INT	SPLE
IV_183	Cucurbitaceae Juss.	Bryonia cretica	Bryonia cretica L.	494	SUBT	milza (consumare)	spleen (to reduce)	EXT	SPLE
IV_183	Cucurbitaceae Juss.	Bryonia cretica	Bryonia cretica L.	494	SUBT	orina (provocare)	diuretic	INT	UR.DI
III_056	Apiaceae Lindl.	Bupleurum fruticosum	Bupleurum fruticosum L.	270	SEED (Fruit)	febbri, le quali chiamano epiale	fevers	INT	FEVE
III_056	Apiaceae Lindl.	Bupleurum fruticosum	Bupleurum fruticosum L.	270	SEED (Fruit)	corpo; dolori di (cacciare via)	abdominal pain (to expel)	INT	GA.FU
III_056	Apiaceae Lindl.	Bupleurum fruticosum	Bupleurum fruticosum L.	270	SEED (Fruit)	digestione (corraborare)	digestif	INT	GA.FU
III_056	Apiaceae Lindl.	Bupleurum fruticosum	Bupleurum fruticosum L.	270	SEED (Fruit)	mestrui (provocare)	menstruation (to induce)	INT	GY.AE
III_056	Apiaceae Lindl.	Bupleurum fruticosum	Bupleurum fruticosum L.	270	SEED (Fruit)	parto (provocare)	delivery (to induce)	INT	GY.AE
III_056	Apiaceae Lindl.	Bupleurum fruticosum	Bupleurum fruticosum L.	270	SEED (Fruit)	madrice; alle prefocationi della	uterine conditions	INT	GY.UT
III_056	Apiaceae Lindl.	Bupleurum fruticosum	Bupleurum fruticosum L.	270	SEED (Fruit)	mal caduco	epilepsy	INT	NS.VA
III_056	Apiaceae Lindl.	Bupleurum fruticosum	Bupleurum fruticosum L.	270	SEED (Fruit)	respirare; à i difetti del	breathing difficulties	INT	RE.BD
III_056	Apiaceae Lindl.	Bupleurum fruticosum	Bupleurum fruticosum L.	270	SEED (Fruit)	tosse vecchia (sanare)	chronic cough (to cure)	INT	RE.CO
III_056	Apiaceae Lindl.	Bupleurum fruticosum	Bupleurum fruticosum L.	270	SEED (Fruit)	distillationi dell'orina; alle	to pass water (diuresis)	INT	UR.DI
III_056	Apiaceae Lindl.	Bupleurum fruticosum	Bupleurum fruticosum L.	270	SEED (Fruit)	freddo; contra al	cold; against	INT	VAR
III_081	Apiaceae Lindl.	Cachrys sp.	Cachrys libanotis L.	297	HERB	vedere (acuire)	eyesight (to sharpen)	EXT	EYES
III_081	Apiaceae Lindl.	Cachrys sp.	Cachrys libanotis L.	297	HERB	posteme del sedere (mitigare)	abscesses of the buttocks (to mitigate)	EXT	SK.IF
III_081	Apiaceae Lindl.	Cachrys sp.	Cachrys libanotis L.	297	HERB	scrofole (maturare)	scrofulous swellings of glands (to maturate)	EXT	SK.IF
III_081	Apiaceae Lindl.	Cachrys sp.	Cachrys libanotis L.	297	HERB	infiammagioni del sedere (mitigare)	inflammations of the buttocks (to relieve)	EXT	SK.IN
III_081	Apiaceae Lindl.	Cachrys sp.	Cachrys libanotis L.	297	HERB	hemorrhoidi (ristagnare)	haemorrhoids (to cure)	EXT	VASC
III_082	Apiaceae Lindl.	Cachrys sp.	Cachrys libanotis L.	299	SEED (Fruit)	occhi; flussi, che scendono à gli	watery eyes	EXT	EYES
III_081	Apiaceae Lindl.	Cachrys sp.	Cachrys libanotis L.	299	SEED (Fruit)	trabocco di fiele	Overflow of bile (jaundice)	INT	GA.LI
III_081	Apiaceae Lindl.	Cachrys sp.	Cachrys libanotis L.	299	SEED (Fruit)	podagre	gout	INT	GOUT
III_081	Apiaceae Lindl.	Cachrys sp.	Cachrys libanotis L.	299	SEED (Fruit)	rotti e spasimati; à i	for the ruptured and the spastics	INT	MU.IN
III_081	Apiaceae Lindl.	Cachrys sp.	Cachrys libanotis L.	299	SEED (Fruit)	mal caduco	epilepsy	INT	NS.VA
III_081	Apiaceae Lindl.	Cachrys sp.	Cachrys libanotis L.	299	SEED (Fruit)	petto; vecchi difetti di	chronic chest defects	INT	RE.OT
III_081	Apiaceae Lindl.	Cachrys sp.	Cachrys libanotis L.	299	SEED (Fruit)	vitiligini (spegnere)	vitiligo (to remove)	INT	SK.CO
III_081	Apiaceae Lindl.	Cachrys sp.	Cachrys libanotis L.	600	SUBT	serpenti; morsi delle	snake bites	INT	ANTI
III_081	Apiaceae Lindl.	Cachrys sp.	Cachrys libanotis L.	600	SUBT	vedere (acuire)	eyesight (to sharpen)	EXT	EYES
III_081	Apiaceae Lindl.	Cachrys sp.	Cachrys libanotis L.	600	SUBT	budella; dolori delle (medicare)	intestinal pain (to treat)	INT	GA.FU
III_081	Apiaceae Lindl.	Cachrys sp.	Cachrys libanotis L.	600	SUBT	mestrui (provocare)	menstruation (to induce)	INT	GY.AE
III_081	Apiaceae Lindl.	Cachrys sp.	Cachrys libanotis L.	600	SUBT	posteme vecchie (risolvere)	chronic abscesses (to dissolve)	EXT	SK.IF
III_081	Apiaceae Lindl.	Cachrys sp.	Cachrys libanotis L.	600	SUBT	ulcere (mondificare)	ulcers (to cleanse)	INT	SK.UL
III_081	Apiaceae Lindl.	Cachrys sp.	Cachrys libanotis L.	600	SUBT	orina (provocare)	diuretic	INT	UR.DI
II_111b	Convolvulaceae Juss.	Calystegia soldanella	Calystegia soldanella (L.) R.Br.	166	HERB	corpo (solvere)	belly (to purge)	INT	GA.PL
III_159	Cannabaceae Martinov	Cannabis sativa	Cannabis sativa L.	360	LEAF	orecchie; dolori delle (medicare)	earache (to cure)	EXT	NS.PA
III_159	Cannabaceae Martinov	Cannabis sativa	Cannabis sativa L.	651	SEED	generare; virtù di (estinguere)	sterilization	INT	ANDR
III_159	Cannabaceae Martinov	Cannabis sativa	Cannabis sativa L.	651	SEED	generare; virtù di (estinguere)	ability to generate (to abolish)	INT	GY.OT
II_164	Capparaceae Juss.	Capparis spinosa	Capparis spinosa L.	666	FLOW	cibo	food	INT	FOOD
II_164	Capparaceae Juss.	Capparis spinosa	Capparis spinosa L.	666	FLOW	mestrui (provocare)	menstruation (to induce)	INT	GY.AE
II_164	Capparaceae Juss.	Capparis spinosa	Capparis spinosa L.	666	FLOW	bocca (lavare)	mouthwash	EXT	MOUTH
II_164	Capparaceae Juss.	Capparis spinosa	Capparis spinosa L.	666	FLOW	rotti e spasimati; à i	for the ruptured and the spastics	INT	MU.IN
II_164	Capparaceae Juss.	Capparis spinosa	Capparis spinosa L.	666	FLOW	flemma della testa (purgare)	phlegm from the head (to purge)	INT	NOSE
II_164	Capparaceae Juss.	Capparis spinosa	Capparis spinosa L.	666	FLOW	dolore dei denti	toothache	EXT	NS.PA
II_164	Capparaceae Juss.	Capparis spinosa	Capparis spinosa L.	666	FLOW	sciatiche; dolori delle	sciatic pain	INT	NS.SC
II_164	Capparaceae Juss.	Capparis spinosa	Capparis spinosa L.	666	FLOW	paralitici; à i	paralyzed	INT	NS.VA
II_164	Capparaceae Juss.	Capparis spinosa	Capparis spinosa L.	666	FLOW	milza (sminuire)	spleen (to reduce)	INT	SPLE
II_164	Capparaceae Juss.	Capparis spinosa	Capparis spinosa L.	666	FLOW	trombi del sangue (fare orinare)	clots of blood (to make urinate)	INT	UR.OT
II_164	Capparaceae Juss.	Capparis spinosa	Capparis spinosa L.	220	LEAF	scrofole	scrofulous swellings of glands	EXT	SK.IF
II_164	Capparaceae Juss.	Capparis spinosa	Capparis spinosa L.	220	LEAF	durezze (risolvere)	indurations (to dissolve)	EXT	SK.OT
II_164	Capparaceae Juss.	Capparis spinosa	Capparis spinosa L.	550	SUBT	mestrui (provocare)	menstruation (to induce)	INT	GY.AE
II_164	Capparaceae Juss.	Capparis spinosa	Capparis spinosa L.	550	SUBT	bocca (lavare)	mouthwash	EXT	MOUTH
II_164	Capparaceae Juss.	Capparis spinosa	Capparis spinosa L.	550	SUBT	rotti e spasimati; à i	for the ruptured and the spastics	INT	MU.IN
II_164	Capparaceae Juss.	Capparis spinosa	Capparis spinosa L.	550	SUBT	flemma della testa (purgare)	phlegm from the head (to purge)	INT	NOSE
II_164	Capparaceae Juss.	Capparis spinosa	Capparis spinosa L.	550	SUBT	dolore dei denti	toothache	EXT	NS.PA
II_164	Capparaceae Juss.	Capparis spinosa	Capparis spinosa L.	550	SUBT	sciatiche; dolori delle	sciatic pain	INT	NS.SC
II_164	Capparaceae Juss.	Capparis spinosa	Capparis spinosa L.	550	SUBT	paralitici; à i	paralyzed	INT	NS.VA
II_164	Capparaceae Juss.	Capparis spinosa	Capparis spinosa L.	550	SUBT	vermini nelle orecchie (ammazzare)	worms in the ears (to kill)	EXT	PARA
II_164	Capparaceae Juss.	Capparis spinosa	Capparis spinosa L.	550	SUBT	vitiligini bianche (spegnere)	white vitiligo (to remove)	EXT	SK.CO
II_164	Capparaceae Juss.	Capparis spinosa	Capparis spinosa L.	550	SUBT	scrofole	scrofulous swellings of glands	EXT	SK.IF
II_164	Capparaceae Juss.	Capparis spinosa	Capparis spinosa L.	550	SUBT	durezze (risolvere)	indurations (to dissolve)	EXT	SK.OT
II_164	Capparaceae Juss.	Capparis spinosa	Capparis spinosa L.	550	SUBT	ulcere vecchie, sordide & callose (mondificare)	chronic, filthy & callous ulcers (to cleanse)	EXT	SK.UL
II_164	Capparaceae Juss.	Capparis spinosa	Capparis spinosa L.	550	SUBT	milza (sminuire)	spleen (to reduce)	INT	SPLE
II_164	Capparaceae Juss.	Capparis spinosa	Capparis spinosa L.	550	SUBT	milza; a coloro, che patiscono nella	spleen ailments	INT	SPLE
II_164	Capparaceae Juss.	Capparis spinosa	Capparis spinosa L.	550	SUBT	trombi del sangue (fare orinare)	clots of blood (to make urinate)	INT	UR.OT
II_145	Brassicaceae Burnett	Capsella sp.	Capsella bursa-pastoris (L.) Medik.	200	SEED	creatura nella madrice (ammazzare)	embryo/foetus (to kill)	INT	GY.AE
II_145	Brassicaceae Burnett	Capsella sp.	Capsella bursa-pastoris (L.) Medik.	200	SEED	mestrui (provocare)	menstruation (to induce)	INT	GY.AE
II_145	Brassicaceae Burnett	Capsella sp.	Capsella bursa-pastoris (L.) Medik.	200	SEED	cholera (purgare di sopra)	yellow bile (to purge upwards)	INT	HMM
II_145	Brassicaceae Burnett	Capsella sp.	Capsella bursa-pastoris (L.) Medik.	200	SEED	cholera (purgare di sotto)	yellow bile (to purge downwards)	INT	HMM
II_145	Brassicaceae Burnett	Capsella sp.	Capsella bursa-pastoris (L.) Medik.	200	SEED	flusso del sangue (fare)	bleedings (to provoke)	INT	HMM
II_145	Brassicaceae Burnett	Capsella sp.	Capsella bursa-pastoris (L.) Medik.	200	SEED	sciatiche	sciatica	CLY	NS.SC
II_145	Brassicaceae Burnett	Capsella sp.	Capsella bursa-pastoris (L.) Medik.	200	SEED	sciatiche	sciatica	CLY	NS.SC
II_145	Brassicaceae Burnett	Capsella sp.	Capsella bursa-pastoris (L.) Medik.	200	SEED	posteme interiori (rompere)	internal abscesses (to break)	INT	VAR
III_101	Asteraceae Bercht. & J.Presl	Carthamus lanatus	Carthamus lanatus L.	314	FLOW	scorpioni; punture de gli	scorpion stings	INT	ANTI
III_101	Asteraceae Bercht. & J.Presl	Carthamus lanatus	Carthamus lanatus L.	561	LEAF	scorpioni; punture de gli	scorpion stings	INT	ANTI
III_101	Asteraceae Bercht. & J.Presl	Carthamus lanatus	Carthamus lanatus L.	315	SEED (Fruit)	scorpioni; punture de gli	scorpion stings	INT	ANTI
IV_189	Asteraceae Bercht. & J.Presl	Carthamus tinctorius	Carthamus tinctorius L.	27	SEED (Fruit)	corpo (purgare)	belly (to purge)	INT	GA.PL
III_061	Apiaceae Lindl.	Carum carvi	Carum carvi L.	276	SEED (Fruit)	antidoti	antidote	INT	ANTI
III_061	Apiaceae Lindl.	Carum carvi	Carum carvi L.	276	SEED (Fruit)	oxipori	penetrative medicines [oxipori]	INT	ANTI
III_061	Apiaceae Lindl.	Carum carvi	Carum carvi L.	276	SEED (Fruit)	fa buona bocca	food	INT	FOOD
III_061	Apiaceae Lindl.	Carum carvi	Carum carvi L.	276	SEED (Fruit)	digestione; alla (aiutare)	digestif	INT	GA.FU
III_061	Apiaceae Lindl.	Carum carvi	Carum carvi L.	276	SEED (Fruit)	orina (provocare)	diuretic	INT	UR.DI
I_123	Fagaceae Dumort.	Castanea sativa	Castanea sativa Mill.	528	FRU	animali velenosi; à i morsi de gli	venomous animal bites	INT	ANTI
I_123	Fagaceae Dumort.	Castanea sativa	Castanea sativa Mill.	528	FRU	tossico; contra al	antidote	INT	ANTI
I_123	Fagaceae Dumort.	Castanea sativa	Castanea sativa Mill.	528	FRU	infiammagioni (mitigare)	inflammations (to mitigate)	EXT	SK.IN
I_123	Fagaceae Dumort.	Castanea sativa	Castanea sativa Mill.	528	FRU	durezze malefiche	malignant indurations	EXT	SK.OT
I_123	Fagaceae Dumort.	Castanea sativa	Castanea sativa Mill.	528	FRU	ulcere malefiche	malignant ulcers	EXT	SK.UL
I_123	Fagaceae Dumort.	Castanea sativa	Castanea sativa Mill.	528	FRU	orina (provocare)	diuretic	INT	UR.DI
I_123	Fagaceae Dumort.	Castanea sativa	Castanea sativa Mill.	608	SEED	ephemero; à chi havesse bevuto	antidote (ephemeron)	INT	ANTI
I_135	Cannabaceae Martinov	Celtis australis	Celtis australis L.	123	FRU	buono da mangiare	food	INT	FOOD
I_135	Cannabaceae Martinov	Celtis australis	Celtis australis L.	123	FRU	corpo (ristrettare)	belly (to costringe)	INT	GA.DI
I_135	Cannabaceae Martinov	Celtis australis	Celtis australis L.	123	FRU	flussi del corpo (ristagnare)	diarrhoea (to stop)	INT	GA.DI
I_135	Cannabaceae Martinov	Celtis australis	Celtis australis L.	123	FRU	capelli rossi (fare)	hair (to dye red)	EXT	SK.CO
I_135	Cannabaceae Martinov	Celtis australis	Celtis australis L.	502	WOOD	disenteria (sanare)	dysentery (to cure)	INT	GA.DI
I_135	Cannabaceae Martinov	Celtis australis	Celtis australis L.	502	WOOD	disenteria (sanare)	dysentery (to cure)	CLY	GA.DI
I_135	Cannabaceae Martinov	Celtis australis	Celtis australis L.	502	WOOD	luoghi secreti delle donne; per li flussi de i	menstrual discharge	INT	GY.VD
I_135	Cannabaceae Martinov	Celtis australis	Celtis australis L.	502	WOOD	luoghi secreti delle donne; per li flussi de i	menstrual discharge	CLY	GY.VD
III_007	Gentianaceae Juss.	Centaurium erythraea	Centaurium erythraea Rafn	240	HERB	occhi; caligini de gli (togliere)	cataract (to remove)	EXT	EYES
III_007	Gentianaceae Juss.	Centaurium erythraea	Centaurium erythraea Rafn	240	HERB	mestrui (provocare)	menstruation (to induce)	CLY	GY.AE
III_007	Gentianaceae Juss.	Centaurium erythraea	Centaurium erythraea Rafn	240	HERB	parto (provocare)	delivery (to induce)	CLY	GY.AE
III_007	Gentianaceae Juss.	Centaurium erythraea	Centaurium erythraea Rafn	240	HERB	cholera & grossi humori del corpo (purgare)	yellow bile & thick humours (to purge downwards)	INT	HMM
III_007	Gentianaceae Juss.	Centaurium erythraea	Centaurium erythraea Rafn	240	HERB	sciatiche	sciatica	CLY	NS.SC
III_007	Gentianaceae Juss.	Centaurium erythraea	Centaurium erythraea Rafn	240	HERB	nervi; difetti dei	nerve ailments	INT	NS.VA
III_007	Gentianaceae Juss.	Centaurium erythraea	Centaurium erythraea Rafn	240	HERB	ulcere (consolidare)	ulcers (to close)	EXT	SK.UL
III_007	Gentianaceae Juss.	Centaurium erythraea	Centaurium erythraea Rafn	240	HERB	ulcere vecchie (purgare)	chronic ulcers (to purge)	EXT	SK.UL
III_007	Gentianaceae Juss.	Centaurium erythraea	Centaurium erythraea Rafn	240	HERB	ferite (saldare)	wounds (to close)	EXT	SK.WO
I_131	Fabaceae Lindl.	Ceratonia siliqua	Ceratonia siliqua L.	113	FRU	orina (provocare)	diuretic	INT	UR.DI
II_177	Boraginaceae Juss.	Cerinthe major	Cerinthe major L.	235	LEAF	vitiligini (sanare)	vitiligo (to cure)	EXT	SK.CO
III_008	Asteraceae Bercht. & J.Presl	Chamaeleon gummifer	Chamaeleon gummifer (L.) Cass.	241	SUBT	veleno delle serpi	snake venoms	INT	ANTI
III_008	Asteraceae Bercht. & J.Presl	Chamaeleon gummifer	Chamaeleon gummifer (L.) Cass.	241	SUBT	vermini tanto larghi del corpo (ammazzare)	very large intestinal worms (to kill)	INT	GA.PL
III_008	Asteraceae Bercht. & J.Presl	Chamaeleon gummifer	Chamaeleon gummifer (L.) Cass.	241	SUBT	ammazzare animali vari	to kill various animals	INT	POIS
III_008	Asteraceae Bercht. & J.Presl	Chamaeleon gummifer	Chamaeleon gummifer (L.) Cass.	241	SUBT	hidropici	dropsy	INT	UR.DI
III_008	Asteraceae Bercht. & J.Presl	Chamaeleon gummifer	Chamaeleon gummifer (L.) Cass.	241	SUBT	orina ritenuta (provocare)	diuretic	INT	UR.DI
II_171	Papaveraceae Juss.	Chelidonium majus	Chelidonium majus L.	230	HERB	vista (rischiarare)	vision (to clear up)	EXT	EYES
II_171	Papaveraceae Juss.	Chelidonium majus	Chelidonium majus L.	231	SUBT	trabocco di fiele	Overflow of bile (jaundice)	INT	GA.LI
II_171	Papaveraceae Juss.	Chelidonium majus	Chelidonium majus L.	231	SUBT	dolore dei denti (levare)	toothache (to alleviate)	EXT	NS.PA
II_171	Papaveraceae Juss.	Chelidonium majus	Chelidonium majus L.	231	SUBT	ulcere serpiginose (guarire)	creeping ulcers (to cure)	EXT	SK.UL
II_122	Asteraceae Bercht. & J.Presl	Chondrilla juncea	Chondrilla juncea L.	541	HERB	vitiligini (curare)	vitiligo (to cure)	EXT	SK.CO
II_122	Asteraceae Bercht. & J.Presl	Chondrilla juncea	Chondrilla juncea L.	183	SUBT	morsi delle vipere	viper bites	INT	ANTI
II_122	Asteraceae Bercht. & J.Presl	Chondrilla juncea	Chondrilla juncea L.	183	SUBT	corpo (ristagnare)	diarrhoea (to check)	INT	GA.DI
II_122	Asteraceae Bercht. & J.Presl	Chondrilla juncea	Chondrilla juncea L.	183	SUBT	peli delle palpebre (fare rinascere)	eyelashes (to make regrow)	EXT	SK.CO
II_122	Asteraceae Bercht. & J.Presl	Chondrilla juncea	Chondrilla juncea L.	183	SUBT	vitiligini (curare)	vitiligo (to cure)	EXT	SK.CO
II_095	Fabaceae Lindl.	Cicer arietinum; Pisum sativum	Cicer arietinum L.	150	SEED	buono al corpo	good for the body	INT	FOOD
II_095	Fabaceae Lindl.	Cicer arietinum; Pisum sativum	Cicer arietinum L.	150	SEED	trabocco di fiele	Overflow of bile (jaundice)	INT	GA.LI
II_095	Fabaceae Lindl.	Cicer arietinum; Pisum sativum	Cicer arietinum L.	150	SEED	mestrui (scacciare)	menstrual bleeding (to expel)	INT	GY.AE
II_095	Fabaceae Lindl.	Cicer arietinum; Pisum sativum	Cicer arietinum L.	150	SEED	parto (scacciare)	embryo/foetus (to expel)	INT	GY.AE
II_095	Fabaceae Lindl.	Cicer arietinum; Pisum sativum	Cicer arietinum L.	150	SEED	latte (generare)	lactation (to stimulate)	INT	GY.BR
II_095	Fabaceae Lindl.	Cicer arietinum; Pisum sativum	Cicer arietinum L.	150	SEED	rogna; contra alla	scabies	EXT	PARA
II_095	Fabaceae Lindl.	Cicer arietinum; Pisum sativum	Cicer arietinum L.	150	SEED	impetigini	impetigo	EXT	SK.IF
II_095	Fabaceae Lindl.	Cicer arietinum; Pisum sativum	Cicer arietinum L.	150	SEED	testicoli; infiammagione de	scrotal inflammation	EXT	SK.IN
II_095	Fabaceae Lindl.	Cicer arietinum; Pisum sativum	Cicer arietinum L.	150	SEED	ulcere del capo che menano; contra	spreading ulcers of the head	EXT	SK.UL
II_095	Fabaceae Lindl.	Cicer arietinum; Pisum sativum	Cicer arietinum L.	150	SEED	ulcere incancarite & maligne	malignant & cancerous ulcers	EXT	SK.UL
II_095	Fabaceae Lindl.	Cicer arietinum; Pisum sativum	Cicer arietinum L.	150	SEED	hidropici	dropsy	INT	UR.DI
II_095	Fabaceae Lindl.	Cicer arietinum; Pisum sativum	Cicer arietinum L.	150	SEED	orina (provocare)	diuretic	INT	UR.DI
II_121	Asteraceae Bercht. & J.Presl	Cichorium intybus	Cichorium intybus L.	182	LEAF	occhi; infiammagioni de gli	eye inflammations	EXT	EYES
II_121	Asteraceae Bercht. & J.Presl	Cichorium intybus	Cichorium intybus L.	182	LEAF	convenire allo stomaco	beneficial (digestion)	INT	FOOD
II_121	Asteraceae Bercht. & J.Presl	Cichorium intybus	Cichorium intybus L.	182	LEAF	corpo (ristagnare)	diarrhoea (to check)	INT	GA.DI
II_121	Asteraceae Bercht. & J.Presl	Cichorium intybus	Cichorium intybus L.	182	LEAF	dolori della bocca dello stomaco	stomach-ache	EXT	GA.FU
II_121	Asteraceae Bercht. & J.Presl	Cichorium intybus	Cichorium intybus L.	182	LEAF	stomaco; ardori e debilità in (alleggerire)	weak & hot stomach (to ease)	INT	GA.FU
II_121	Asteraceae Bercht. & J.Presl	Cichorium intybus	Cichorium intybus L.	182	LEAF	podagre	gout	EXT	GOUT
II_121	Asteraceae Bercht. & J.Presl	Cichorium intybus	Cichorium intybus L.	182	LEAF	punture de gli scorpioni	scorpion stings	EXT	SK.AB
II_121	Asteraceae Bercht. & J.Presl	Cichorium intybus	Cichorium intybus L.	182	LEAF	fuoco sacro	erysipelas	EXT	SK.IF
II_121	Asteraceae Bercht. & J.Presl	Cichorium intybus	Cichorium intybus L.	694	SUBT	punture de gli scorpioni	scorpion stings	EXT	SK.AB
II_121	Asteraceae Bercht. & J.Presl	Cichorium intybus	Cichorium intybus L.	694	SUBT	fuoco sacro	erysipelas	EXT	SK.IF
I_013	Lauraceae Juss.	Cinnamomum sp.; Neolitsea sp.	Cinnamomum verum J.Presl	10	BARK	morsi di tutti animali velenosi	venomous animal bites	INT	ANTI
I_013	Lauraceae Juss.	Cinnamomum sp.; Neolitsea sp.	Cinnamomum verum J.Presl	10	BARK	punture di tutti animali velenosi	venomous animal stings	INT	ANTI
I_013	Lauraceae Juss.	Cinnamomum sp.; Neolitsea sp.	Cinnamomum verum J.Presl	10	BARK	veleni di tutti animali velenosi	animal venoms	INT	ANTI
I_013	Lauraceae Juss.	Cinnamomum sp.; Neolitsea sp.	Cinnamomum verum J.Presl	10	BARK	mestrui (provocare tanto)	menstruation (to induce)	INT	GY.AE
I_013	Lauraceae Juss.	Cinnamomum sp.; Neolitsea sp.	Cinnamomum verum J.Presl	10	BARK	mestrui (provocare)	menstruation (to induce)	CLY	GY.AE
I_013	Lauraceae Juss.	Cinnamomum sp.; Neolitsea sp.	Cinnamomum verum J.Presl	10	BARK	parto (provocare)	delivery (to induce)	INT	GY.AE
I_013	Lauraceae Juss.	Cinnamomum sp.; Neolitsea sp.	Cinnamomum verum J.Presl	10	BARK	parto (provocare)	delivery (to induce)	CLY	GY.AE
I_013	Lauraceae Juss.	Cinnamomum sp.; Neolitsea sp.	Cinnamomum verum J.Presl	10	BARK	catarri	catarrhs	INT	RE.CO
I_013	Lauraceae Juss.	Cinnamomum sp.; Neolitsea sp.	Cinnamomum verum J.Presl	10	BARK	tosse	cough	INT	RE.CO
I_013	Lauraceae Juss.	Cinnamomum sp.; Neolitsea sp.	Cinnamomum verum J.Presl	10	BARK	lentigini (spegnere)	freckles (to remove)	EXT	SK.CO
I_013	Lauraceae Juss.	Cinnamomum sp.; Neolitsea sp.	Cinnamomum verum J.Presl	10	BARK	macchie della pelle della faccia causate dal sole (spegnere)	facial blemishes caused by sunlight (to remove)	EXT	SK.CO
I_013	Lauraceae Juss.	Cinnamomum sp.; Neolitsea sp.	Cinnamomum verum J.Presl	10	BARK	hidropisie	dropsy	INT	UR.DI
I_013	Lauraceae Juss.	Cinnamomum sp.; Neolitsea sp.	Cinnamomum verum J.Presl	10	BARK	orina (provocare)	diuretic	INT	UR.DI
I_013	Lauraceae Juss.	Cinnamomum sp.; Neolitsea sp.	Cinnamomum verum J.Presl	10	BARK	orinare; difficoltà d'	urinary retention	INT	UR.OT
I_013	Lauraceae Juss.	Cinnamomum sp.; Neolitsea sp.	Cinnamomum verum J.Presl	10	BARK	reni; malattie delle	kidney diseases	INT	UR.OT
I_109	Cistaceae Juss.	Cistus ladanifer	Cistus ladanifer L.	89	EXUD	corpo (ristagnare)	diarrhoea (to check)	INT	GA.DI
I_109	Cistaceae Juss.	Cistus ladanifer	Cistus ladanifer L.	89	EXUD	secondine (tirare fuori)	placenta (to draw out)	FUMI	GY.AE
I_109	Cistaceae Juss.	Cistus ladanifer	Cistus ladanifer L.	89	EXUD	madrice; durezze della (mollificare)	uterine indurations (to soften)	CLY	GY.UT
I_109	Cistaceae Juss.	Cistus ladanifer	Cistus ladanifer L.	89	EXUD	dolori (mitigare)	pain (to mitigate)	INT	NS.PA
I_109	Cistaceae Juss.	Cistus ladanifer	Cistus ladanifer L.	89	EXUD	orecchie; dolori delle	earache	EXT	NS.PA
I_109	Cistaceae Juss.	Cistus ladanifer	Cistus ladanifer L.	89	EXUD	tosse	cough	INT	RE.CO
I_109	Cistaceae Juss.	Cistus ladanifer	Cistus ladanifer L.	89	EXUD	capelli; cascare dei (prohibire)	hair loss (to prevent)	EXT	SK.CO
I_109	Cistaceae Juss.	Cistus ladanifer	Cistus ladanifer L.	89	EXUD	cicatrici; le macchie delle (spegnere)	scars; appearance of (to improve)	EXT	SK.CO
I_109	Cistaceae Juss.	Cistus ladanifer	Cistus ladanifer L.	89	EXUD	pelle (abbellire)	skin (to beautify)	EXT	SK.CO
I_109	Cistaceae Juss.	Cistus ladanifer	Cistus ladanifer L.	89	EXUD	orina (provocare)	diuretic	INT	UR.DI
I_107	Cistaceae Juss.	Cistus sp.	Cistus salviifolius L.	87	FLOW	flussi disenterici	dysentery	INT	GA.DI
I_107	Cistaceae Juss.	Cistus sp.	Cistus salviifolius L.	87	FLOW	cotture del fuoco (conferire)	burns (to be good for)	EXT	SK.IN
I_107	Cistaceae Juss.	Cistus sp.	Cistus salviifolius L.	87	FLOW	ulcere che vanno serpendo (fermare)	creeping ulcers (to stop)	EXT	SK.UL
I_107	Cistaceae Juss.	Cistus sp.	Cistus salviifolius L.	87	FLOW	ulcere vecchie	chronic ulcers	EXT	SK.UL
I_107	Cistaceae Juss.	Cistus sp.	Cistus salviifolius L.	87	FLOW	ulcere vecchie (conferire)	chronic ulcers (to be good for)	EXT	SK.UL
IV_178	Cucurbitaceae Juss.	Citrullus colocynthis	Citrullus colocynthis (L.) Schrad.	487	FRU	dolori colici	colic	CLY	GA.FU
IV_178	Cucurbitaceae Juss.	Citrullus colocynthis	Citrullus colocynthis (L.) Schrad.	487	FRU	corpo (muovere)	digestion (to advance)	CLY	GA.PL
IV_178	Cucurbitaceae Juss.	Citrullus colocynthis	Citrullus colocynthis (L.) Schrad.	487	FRU	corpo (solvere)	belly (to purge)	INT	GA.PL
IV_178	Cucurbitaceae Juss.	Citrullus colocynthis	Citrullus colocynthis (L.) Schrad.	487	FRU	creatura nel ventre (ammazzare)	embryo/foetus (to kill)	CLY	GY.AE
IV_178	Cucurbitaceae Juss.	Citrullus colocynthis	Citrullus colocynthis (L.) Schrad.	487	FRU	cholera, flemma, raschiature & qualche volta fino al sangue (solvere)	yellow bile, phlegm, matter & blood (to dissolve)	CLY	HMM
IV_178	Cucurbitaceae Juss.	Citrullus colocynthis	Citrullus colocynthis (L.) Schrad.	487	FRU	humori grossi & raschiature del carpo (purgare per disotto)	thick humours & matter (to purge downwards)	INT	HMM
IV_178	Cucurbitaceae Juss.	Citrullus colocynthis	Citrullus colocynthis (L.) Schrad.	487	FRU	dolore dei denti (levare)	toothache (to alleviate)	EXT	NS.PA
IV_178	Cucurbitaceae Juss.	Citrullus colocynthis	Citrullus colocynthis (L.) Schrad.	487	FRU	sciatiche	sciatica	CLY	NS.SC
IV_178	Cucurbitaceae Juss.	Citrullus colocynthis	Citrullus colocynthis (L.) Schrad.	487	FRU	sciatiche; dolori delle	sciatic pain	CLY	NS.SC
IV_178	Cucurbitaceae Juss.	Citrullus colocynthis	Citrullus colocynthis (L.) Schrad.	487	FRU	paralitici; à i	paralyzed	CLY	NS.VA
I_132g	Rutaceae Juss.	Citrus medica	Citrus medica L.	118	FRU	mangiare	food	INT	FOOD
I_132g	Rutaceae Juss.	Citrus medica	Citrus medica L.	118	FRU	donne gravide; difetti delle	pregnancy conditions	INT	GY.OT
I_132g	Rutaceae Juss.	Citrus medica	Citrus medica L.	119	SEED	veleni (superare)	antidote	INT	ANTI
IV_182	Ranunculaceae Juss.	Clematis sp.	Clematis vitalba L.	688	HERB	cibo	food	INT	FOOD
IV_182	Ranunculaceae Juss.	Clematis sp.	Clematis vitalba L.	491	SEED	macole della pelle della faccia	facial blemishes	EXT	SK.CO
IV_182	Ranunculaceae Juss.	Clematis sp.	Clematis vitalba L.	490	SUBT	purgare humidità del corpo	to purge bodily moisture	INT	GA.PL
IV_182	Ranunculaceae Juss.	Clematis sp.	Clematis vitalba L.	490	SUBT	hidropici	dropsy	INT	UR.DI
III_038	Lamiaceae Martinov	Clinopodium nepeta	Clinopodium nepeta (L.) Kuntze	701	LEAF	serpi velenose; morsi delle	venomous snake bites	INT	ANTI
III_038	Lamiaceae Martinov	Clinopodium nepeta	Clinopodium nepeta (L.) Kuntze	701	LEAF	veleni; contra à i	poisons	INT	ANTI
III_038	Lamiaceae Martinov	Clinopodium nepeta	Clinopodium nepeta (L.) Kuntze	701	LEAF	periodiche febbri; freddo & tremore, che vengono nel principio delle	shivering & tremor at the beginning of periodic fevers	INT	FEVE
III_038	Lamiaceae Martinov	Clinopodium nepeta	Clinopodium nepeta (L.) Kuntze	701	LEAF	corpo; dolori di	abdominal pain	INT	GA.FU
III_038	Lamiaceae Martinov	Clinopodium nepeta	Clinopodium nepeta (L.) Kuntze	701	LEAF	vomito cholerico; al	vomiting of yellow bile	INT	GA.FU
III_038	Lamiaceae Martinov	Clinopodium nepeta	Clinopodium nepeta (L.) Kuntze	701	LEAF	trabocco di fiele	Overflow of bile (jaundice)	INT	GA.LI
III_038	Lamiaceae Martinov	Clinopodium nepeta	Clinopodium nepeta (L.) Kuntze	701	LEAF	vermini del corpo (ammazzare)	intestinal worms (to kill)	INT	GA.PL
III_038	Lamiaceae Martinov	Clinopodium nepeta	Clinopodium nepeta (L.) Kuntze	701	LEAF	creature (ammazzare)	embryo/foetus (to kill)	CLY	GY.AE
III_038	Lamiaceae Martinov	Clinopodium nepeta	Clinopodium nepeta (L.) Kuntze	701	LEAF	mestrui (provocare)	menstruation (to induce)	INT	GY.AE
III_038	Lamiaceae Martinov	Clinopodium nepeta	Clinopodium nepeta (L.) Kuntze	701	LEAF	mestrui (provocare)	menstruation (to induce)	CLY	GY.AE
III_038	Lamiaceae Martinov	Clinopodium nepeta	Clinopodium nepeta (L.) Kuntze	701	LEAF	lividi (spegnere)	bruises (to remove)	EXT	MU.EX
III_038	Lamiaceae Martinov	Clinopodium nepeta	Clinopodium nepeta (L.) Kuntze	701	LEAF	rotti e spasimati; à i	for the ruptured and the spastics	INT	MU.IN
III_038	Lamiaceae Martinov	Clinopodium nepeta	Clinopodium nepeta (L.) Kuntze	701	LEAF	sciatiche	sciatica	EXT	NS.SC
III_038	Lamiaceae Martinov	Clinopodium nepeta	Clinopodium nepeta (L.) Kuntze	701	LEAF	vermini nelle orecchie (ammazzare)	worms in the ears (to kill)	EXT	PARA
III_038	Lamiaceae Martinov	Clinopodium nepeta	Clinopodium nepeta (L.) Kuntze	701	LEAF	asmatici	asthmatics	INT	RE.BD
III_038	Lamiaceae Martinov	Clinopodium nepeta	Clinopodium nepeta (L.) Kuntze	701	LEAF	serpenti (fare fuggire)	snakes (to repel)	FUMI	REPE
III_038	Lamiaceae Martinov	Clinopodium nepeta	Clinopodium nepeta (L.) Kuntze	701	LEAF	serpenti (fare fuggire)	snakes (to repel)	EXT	REPE
III_038	Lamiaceae Martinov	Clinopodium nepeta	Clinopodium nepeta (L.) Kuntze	701	LEAF	morsi delle serpi velenose	bites of venomous snakes (to medicate)	EXT	SK.AB
III_038	Lamiaceae Martinov	Clinopodium nepeta	Clinopodium nepeta (L.) Kuntze	701	LEAF	cicatrici nere (fare diventare bianche)	black scars (to turn white)	EXT	SK.CO
III_038	Lamiaceae Martinov	Clinopodium nepeta	Clinopodium nepeta (L.) Kuntze	701	LEAF	lepra (alla)	lepra	INT	SK.IF
III_038	Lamiaceae Martinov	Clinopodium nepeta	Clinopodium nepeta (L.) Kuntze	701	LEAF	orina (provocare)	diuretic	INT	UR.DI
III_103	Lamiaceae Martinov	Clinopodium vulgare	Clinopodium vulgare L.	678	HERB	serpenti; morsi delle	snake bites	INT	ANTI
III_103	Lamiaceae Martinov	Clinopodium vulgare	Clinopodium vulgare L.	678	HERB	corpo (ristagnare)	diarrhoea (to check)	INT	GA.DI
III_103	Lamiaceae Martinov	Clinopodium vulgare	Clinopodium vulgare L.	678	HERB	mestrui (provocare)	menstruation (to induce)	INT	GY.AE
III_103	Lamiaceae Martinov	Clinopodium vulgare	Clinopodium vulgare L.	678	HERB	parto (provocare)	delivery (to induce)	INT	GY.AE
III_103	Lamiaceae Martinov	Clinopodium vulgare	Clinopodium vulgare L.	678	HERB	rotture; alle	ruptures	INT	MU.IN
III_103	Lamiaceae Martinov	Clinopodium vulgare	Clinopodium vulgare L.	678	HERB	spasimati	spastics	INT	MU.IN
III_103	Lamiaceae Martinov	Clinopodium vulgare	Clinopodium vulgare L.	678	HERB	porri, che si chiamano acrochordone (stirpare fuori)	warts (to remove)	INT	SK.OT
III_103	Lamiaceae Martinov	Clinopodium vulgare	Clinopodium vulgare L.	678	HERB	distillationi dell'orina; alle	to pass water (diuresis)	INT	UR.DI
IV_086	Colchicaceae DC.	Colchicum sp.	Colchicum autumnale L.	428	SUBT	ammazzare	to kill	INT	POIS
I_018	Burseraceae Kunth	Commiphora sp.	Commiphora gileadensis (L.) C.Chr.	510	EXUD	antidoti	antidote	INT	ANTI
I_018	Burseraceae Kunth	Commiphora sp.	Commiphora gileadensis (L.) C.Chr.	510	EXUD	l'aconito; a coloro che havessero bevuto	antidote (aconite)	INT	ANTI
I_018	Burseraceae Kunth	Commiphora sp.	Commiphora gileadensis (L.) C.Chr.	510	EXUD	serpenti; morsi dei	snake bites	INT	ANTI
I_018	Burseraceae Kunth	Commiphora sp.	Commiphora gileadensis (L.) C.Chr.	510	EXUD	vista; cose, che offuscano la (levare via)	vision (to clear up)	INT	EYES
I_018	Burseraceae Kunth	Commiphora sp.	Commiphora gileadensis (L.) C.Chr.	510	EXUD	febbri; tremore & freddo, che precedono	tremor & shivering that precede fevers	EXT	FEVE
I_018	Burseraceae Kunth	Commiphora sp.	Commiphora gileadensis (L.) C.Chr.	510	EXUD	crudità (digerire)	digestif	EXT	GA.FU
I_018	Burseraceae Kunth	Commiphora sp.	Commiphora gileadensis (L.) C.Chr.	510	EXUD	mestrui (provocare)	menstruation (to induce)	CLY	GY.AE
I_018	Burseraceae Kunth	Commiphora sp.	Commiphora gileadensis (L.) C.Chr.	510	EXUD	parto (provocare)	delivery (to induce)	CLY	GY.AE
I_018	Burseraceae Kunth	Commiphora sp.	Commiphora gileadensis (L.) C.Chr.	510	EXUD	secondine (provocare)	placenta (to promote expulsion)	CLY	GY.AE
I_018	Burseraceae Kunth	Commiphora sp.	Commiphora gileadensis (L.) C.Chr.	510	EXUD	madrice; alle frigidità della	uterine chills	CLY	GY.UT
I_018	Burseraceae Kunth	Commiphora sp.	Commiphora gileadensis (L.) C.Chr.	510	EXUD	lassitudini	fatigue	INT	NS.PS
I_018	Burseraceae Kunth	Commiphora sp.	Commiphora gileadensis (L.) C.Chr.	510	EXUD	petto; stretti di	dyspnoea	INT	RE.BD
I_018	Burseraceae Kunth	Commiphora sp.	Commiphora gileadensis (L.) C.Chr.	510	EXUD	ulcere sordide (purgare)	filthy ulcers (to purge)	EXT	SK.UL
I_018	Burseraceae Kunth	Commiphora sp.	Commiphora gileadensis (L.) C.Chr.	510	EXUD	orina (provocare)	diuretic	INT	UR.DI
I_018	Burseraceae Kunth	Commiphora sp.	Commiphora gileadensis (L.) C.Chr.	511	SEED	serpenti; morsi dei	snake bites	INT	ANTI
I_018	Burseraceae Kunth	Commiphora sp.	Commiphora gileadensis (L.) C.Chr.	511	SEED	corpo; dolori di	abdominal pain	INT	GA.FU
I_018	Burseraceae Kunth	Commiphora sp.	Commiphora gileadensis (L.) C.Chr.	511	SEED	humore della madrice (tirare fuori)	vaginal discharge (draw down)	EXT	GY.AE
I_018	Burseraceae Kunth	Commiphora sp.	Commiphora gileadensis (L.) C.Chr.	511	SEED	madrice; oppilationi della (aprire)	uterine obstruction (to open)	EXT	GY.UT
I_018	Burseraceae Kunth	Commiphora sp.	Commiphora gileadensis (L.) C.Chr.	511	SEED	dolori laterali; ne	lateral pain	INT	NS.PA
I_018	Burseraceae Kunth	Commiphora sp.	Commiphora gileadensis (L.) C.Chr.	511	SEED	sciatiche	sciatica	INT	NS.SC
I_018	Burseraceae Kunth	Commiphora sp.	Commiphora gileadensis (L.) C.Chr.	511	SEED	mal caduco	epilepsy	INT	NS.VA
I_018	Burseraceae Kunth	Commiphora sp.	Commiphora gileadensis (L.) C.Chr.	511	SEED	vertigini	vertigo	INT	NS.VA
I_018	Burseraceae Kunth	Commiphora sp.	Commiphora gileadensis (L.) C.Chr.	511	SEED	asma	asthma	INT	RE.BD
I_018	Burseraceae Kunth	Commiphora sp.	Commiphora gileadensis (L.) C.Chr.	511	SEED	tosse	cough	INT	RE.CO
I_018	Burseraceae Kunth	Commiphora sp.	Commiphora gileadensis (L.) C.Chr.	511	SEED	polmone; difetti del	lung defects	INT	RE.OT
I_018	Burseraceae Kunth	Commiphora sp.	Commiphora gileadensis (L.) C.Chr.	511	SEED	orinare; difficoltà d'	urinary retention	INT	UR.OT
I_018	Burseraceae Kunth	Commiphora sp.	Commiphora gileadensis (L.) C.Chr.	512	WOOD	animali velenosi; morso de gli	venomous animal bites	INT	ANTI
I_018	Burseraceae Kunth	Commiphora sp.	Commiphora gileadensis (L.) C.Chr.	512	WOOD	corpo; dolori del	abdominal pain	INT	GA.FU
I_018	Burseraceae Kunth	Commiphora sp.	Commiphora gileadensis (L.) C.Chr.	512	WOOD	crudità; alle	digestif	INT	GA.FU
I_018	Burseraceae Kunth	Commiphora sp.	Commiphora gileadensis (L.) C.Chr.	512	WOOD	ossa; scaglie dell' (cavare)	bone splinters (to remove)	EXT	MU.EX
I_018	Burseraceae Kunth	Commiphora sp.	Commiphora gileadensis (L.) C.Chr.	512	WOOD	spasimo	spasms	INT	MU.IN
I_018	Burseraceae Kunth	Commiphora sp.	Commiphora gileadensis (L.) C.Chr.	512	WOOD	ferite della testa	wounds of the head	EXT	SK.WO
I_018	Burseraceae Kunth	Commiphora sp.	Commiphora gileadensis (L.) C.Chr.	512	WOOD	orina (provocare)	diuretic	INT	UR.DI
I_064	Burseraceae Kunth	Commiphora sp.	Commiphora myrrha (T.Nees) Engl.	48	EXUD	orecchie; rotture delle (sanare)	ear ailments (to cure)	EXT	EARS
I_064	Burseraceae Kunth	Commiphora sp.	Commiphora myrrha (T.Nees) Engl.	48	EXUD	occhi; albugini de gli (togliere)	albugo/leucoma (to remove)	EXT	EYES
I_064	Burseraceae Kunth	Commiphora sp.	Commiphora myrrha (T.Nees) Engl.	48	EXUD	occhi; asprezza de gli (polire)	roughness of the eye (to clean)	EXT	EYES
I_064	Burseraceae Kunth	Commiphora sp.	Commiphora myrrha (T.Nees) Engl.	48	EXUD	occhi; caligini de gli (togliere)	cataract (to remove)	EXT	EYES
I_064	Burseraceae Kunth	Commiphora sp.	Commiphora myrrha (T.Nees) Engl.	48	EXUD	occhi; ulcere de gli (riempire)	eye ulcers (to fill)	EXT	EYES
I_064	Burseraceae Kunth	Commiphora sp.	Commiphora myrrha (T.Nees) Engl.	48	EXUD	febbri; tremore & freddo, che precedono	tremor & shivering that precede fevers	INT	FEVE
I_064	Burseraceae Kunth	Commiphora sp.	Commiphora myrrha (T.Nees) Engl.	48	EXUD	disenteria	dysentery	INT	GA.DI
I_064	Burseraceae Kunth	Commiphora sp.	Commiphora myrrha (T.Nees) Engl.	48	EXUD	flussi del corpo	diarrhoea	INT	GA.DI
I_064	Burseraceae Kunth	Commiphora sp.	Commiphora myrrha (T.Nees) Engl.	48	EXUD	vermini del corpo (ammazzare)	intestinal worms (to kill)	INT	GA.PL
I_064	Burseraceae Kunth	Commiphora sp.	Commiphora myrrha (T.Nees) Engl.	48	EXUD	mestrui (provocare)	menstruation (to induce)	CLY	GY.AE
I_064	Burseraceae Kunth	Commiphora sp.	Commiphora myrrha (T.Nees) Engl.	48	EXUD	parto (provocare)	delivery (to induce)	CLY	GY.AE
I_064	Burseraceae Kunth	Commiphora sp.	Commiphora myrrha (T.Nees) Engl.	48	EXUD	luoghi naturale delle donne; le durezze de (mollificare)	uterine indurations (to soften)	CLY	GY.UT
I_064	Burseraceae Kunth	Commiphora sp.	Commiphora myrrha (T.Nees) Engl.	48	EXUD	luoghi naturale delle donne; oppilationi de (aprire)	uterine obstruction (to open)	CLY	GY.UT
I_064	Burseraceae Kunth	Commiphora sp.	Commiphora myrrha (T.Nees) Engl.	48	EXUD	denti smossi	loose teeth	EXT	MOUTH
I_064	Burseraceae Kunth	Commiphora sp.	Commiphora myrrha (T.Nees) Engl.	48	EXUD	gengive (strignere)	gums (to tighten)	EXT	MOUTH
I_064	Burseraceae Kunth	Commiphora sp.	Commiphora myrrha (T.Nees) Engl.	48	EXUD	ossa scoperte (ricoprire di carne)	exposed bones (to flesh up)	EXT	MU.EX
I_064	Burseraceae Kunth	Commiphora sp.	Commiphora myrrha (T.Nees) Engl.	48	EXUD	costato; dolori del	side stitch	INT	NS.PA
I_064	Burseraceae Kunth	Commiphora sp.	Commiphora myrrha (T.Nees) Engl.	48	EXUD	sonno (provocare)	soporific	INT	NS.PS
I_064	Burseraceae Kunth	Commiphora sp.	Commiphora myrrha (T.Nees) Engl.	48	EXUD	canna del polmone; l'asprezza della (levare)	trachea; roughness of (to remove)	EXT	RE.CO
I_064	Burseraceae Kunth	Commiphora sp.	Commiphora myrrha (T.Nees) Engl.	48	EXUD	catarri vecchi	chronic catarrhs	EXT	RE.CO
I_064	Burseraceae Kunth	Commiphora sp.	Commiphora myrrha (T.Nees) Engl.	48	EXUD	tosse vecchia	chronic cough	INT	RE.CO
I_064	Burseraceae Kunth	Commiphora sp.	Commiphora myrrha (T.Nees) Engl.	48	EXUD	petto; dolore del	chest pain	INT	RE.OT
I_064	Burseraceae Kunth	Commiphora sp.	Commiphora myrrha (T.Nees) Engl.	48	EXUD	voce; raucedine della	hoarseness	EXT	RE.OT
I_064	Burseraceae Kunth	Commiphora sp.	Commiphora myrrha (T.Nees) Engl.	48	EXUD	capelli, che cascano (fermare)	hair loss (to stop)	EXT	SK.CO
I_064	Burseraceae Kunth	Commiphora sp.	Commiphora myrrha (T.Nees) Engl.	48	EXUD	fetore delle ditella; per il	smelly underarm sweating	EXT	SK.CO
I_064	Burseraceae Kunth	Commiphora sp.	Commiphora myrrha (T.Nees) Engl.	48	EXUD	quosi della faccia	facial blemishes	EXT	SK.CO
I_064	Burseraceae Kunth	Commiphora sp.	Commiphora myrrha (T.Nees) Engl.	48	EXUD	impetigini (purgare)	impetigo (to cleanse)	EXT	SK.IF
I_064	Burseraceae Kunth	Commiphora sp.	Commiphora myrrha (T.Nees) Engl.	48	EXUD	orecchie; distillationi delle	ear infection	EXT	SK.IF
I_064	Burseraceae Kunth	Commiphora sp.	Commiphora myrrha (T.Nees) Engl.	48	EXUD	orecchie; infiammagioni delle	inflammations of the ears	EXT	SK.IN
I_064	Burseraceae Kunth	Commiphora sp.	Commiphora myrrha (T.Nees) Engl.	48	EXUD	ferite della testa (saldare)	wounds of the head (to close)	EXT	SK.WO
IV_081	Apiaceae Lindl.	Conium maculatum	Conium maculatum L.	425	HERB	testicoli de fanciulli; prohibire il nutrimento dei	testicular maturation in boys (to inhibit)	EXT	ANDR
IV_081	Apiaceae Lindl.	Conium maculatum	Conium maculatum L.	425	HERB	latte delle donne di parto (diseccare)	postpartum lactation (to dry out)	EXT	GY.OT
IV_081	Apiaceae Lindl.	Conium maculatum	Conium maculatum L.	425	HERB	vergini; mammelle delle (non le lasciare crescere)	breasts of virgins (to prevent development)	EXT	GY.OT
IV_081	Apiaceae Lindl.	Conium maculatum	Conium maculatum L.	425	HERB	l'imaginationi, che dormendo provocano altrui à lussuria (togliere)	sexual dreams (to prevent)	EXT	LIBI
IV_081	Apiaceae Lindl.	Conium maculatum	Conium maculatum L.	425	HERB	dolori (alleggerire)	pain (to ease)	EXT	NS.PA
IV_081	Apiaceae Lindl.	Conium maculatum	Conium maculatum L.	425	HERB	ammazzare	to kill	INT	POIS
IV_081	Apiaceae Lindl.	Conium maculatum	Conium maculatum L.	425	HERB	fuoco sacro (fermare)	erysipelas	EXT	SK.IF
IV_081	Apiaceae Lindl.	Conium maculatum	Conium maculatum L.	425	HERB	ulcere, che se ne vanno serpendo (fermare)	spreading ulcers (to stop)	EXT	SK.UL
IV_081	Apiaceae Lindl.	Conium maculatum	Conium maculatum L.	426	SEED (Fruit)	testicoli de fanciulli; prohibire il nutrimento dei	testicular maturation in boys (to inhibit)	EXT	ANDR
IV_081	Apiaceae Lindl.	Conium maculatum	Conium maculatum L.	426	SEED (Fruit)	occhi; dolori de gli (alleggerire)	eye pain (to alleviate)	EXT	EYES
IV_081	Apiaceae Lindl.	Conium maculatum	Conium maculatum L.	426	SEED (Fruit)	latte delle donne di parto (diseccare)	postpartum lactation (to dry out)	EXT	GY.OT
IV_081	Apiaceae Lindl.	Conium maculatum	Conium maculatum L.	426	SEED (Fruit)	vergini; mammelle delle (non le lasciare crescere)	breasts of virgins (to prevent development)	EXT	GY.OT
IV_081	Apiaceae Lindl.	Conium maculatum	Conium maculatum L.	426	SEED (Fruit)	l'imaginationi, che dormendo provocano altrui à lussuria (togliere)	sexual dreams (to prevent)	EXT	LIBI
IV_081	Apiaceae Lindl.	Conium maculatum	Conium maculatum L.	426	SEED (Fruit)	ammazzare	to kill	INT	POIS
IV_081	Apiaceae Lindl.	Conium maculatum	Conium maculatum L.	426	SEED (Fruit)	fuoco sacro (fermare)	erysipelas	EXT	SK.IF
IV_081	Apiaceae Lindl.	Conium maculatum	Conium maculatum L.	426	SEED (Fruit)	ulcere, che se ne vanno serpendo (fermare)	spreading ulcers (to stop)	EXT	SK.UL
IV_041	Convolvulaceae Juss.	Convolvulus arvensis	Convolvulus arvensis L.	394	LEAF	corpo (purgare)	belly (to purge)	INT	GA.PL
IV_172	Convolvulaceae Juss.	Convolvulus scammonia	Convolvulus scammonia L.	483	EXUD	creatura nella madrice (ammazzare)	embryo/fetus (to kill)	CLY	GY.AE
IV_172	Convolvulaceae Juss.	Convolvulus scammonia	Convolvulus scammonia L.	483	EXUD	cholera & flemma (purgare per disotto)	yellow bile & phlegm (to purge downward)	INT	HMM
IV_172	Convolvulaceae Juss.	Convolvulus scammonia	Convolvulus scammonia L.	483	EXUD	dolore antiche del capo	chronic headache	EXT	NS.PA
IV_172	Convolvulaceae Juss.	Convolvulus scammonia	Convolvulus scammonia L.	483	EXUD	sciatiche	sciatica	EXT	NS.SC
IV_172	Convolvulaceae Juss.	Convolvulus scammonia	Convolvulus scammonia L.	483	EXUD	scabbia (cacciare via)	scabies (to drive out)	EXT	PARA
IV_172	Convolvulaceae Juss.	Convolvulus scammonia	Convolvulus scammonia L.	483	EXUD	postemette (risolvere)	small abscesses (to dissolve)	EXT	SK.IF
IV_172	Convolvulaceae Juss.	Convolvulus scammonia	Convolvulus scammonia L.	659	SUBT	cholera & flemma (purgare per disotto)	yellow bile & phlegm (to purge downward)	INT	HMM
IV_172	Convolvulaceae Juss.	Convolvulus scammonia	Convolvulus scammonia L.	659	SUBT	sciatiche	sciatica	EXT	NS.SC
III_066	Apiaceae Lindl.	Coriandrum sativum	Coriandrum sativum L.	279	LEAF	carboncelli (sanare)	carbuncles (to cure)	EXT	SK.IF
III_066	Apiaceae Lindl.	Coriandrum sativum	Coriandrum sativum L.	279	LEAF	epinittidi (sanare)	pustules (to cure)	EXT	SK.IF
III_066	Apiaceae Lindl.	Coriandrum sativum	Coriandrum sativum L.	279	LEAF	fuoco sacro (medicare)	erysipelas	EXT	SK.IF
III_066	Apiaceae Lindl.	Coriandrum sativum	Coriandrum sativum L.	279	LEAF	pani (risolvere)	abscesses (to soften)	EXT	SK.IF
III_066	Apiaceae Lindl.	Coriandrum sativum	Coriandrum sativum L.	279	LEAF	scrofole (risolvere)	scrofulous swellings of glands (to dissolve)	EXT	SK.IF
III_066	Apiaceae Lindl.	Coriandrum sativum	Coriandrum sativum L.	279	LEAF	testicoli; posteme de i	scrotal abscesses	EXT	SK.IF
III_066	Apiaceae Lindl.	Coriandrum sativum	Coriandrum sativum L.	279	LEAF	ulcere corrosive & serpigniose (medicare)	creeping ulcers (to medicate)	EXT	SK.UL
III_066	Apiaceae Lindl.	Coriandrum sativum	Coriandrum sativum L.	280	SEED (Fruit)	sperma (aumentare)	sperm (to increase)	INT	ANDR
III_066	Apiaceae Lindl.	Coriandrum sativum	Coriandrum sativum L.	280	SEED (Fruit)	vermini del corpo (cacciare fuori)	intestinal worms (to drive out)	INT	GA.PL
III_066	Apiaceae Lindl.	Coriandrum sativum	Coriandrum sativum L.	280	SEED (Fruit)	ardenti infiammagioni della pelle	fiery skin inflammations	EXT	SK.IN
IV_010	Primulaceae Batsch ex Borkh.	Coris monspeliensis	Coris monspeliensis L.	373	SUBT	disenteria	dysentery	INT	GA.DI
IV_010	Primulaceae Batsch ex Borkh.	Coris monspeliensis	Coris monspeliensis L.	373	SUBT	rotture intestinali (consolidare)	intestinal ruptures	EXT	GA.FU
IV_010	Primulaceae Batsch ex Borkh.	Coris monspeliensis	Coris monspeliensis L.	373	SUBT	flussi rossi mestruali; per li	red menstrual discharge (to check)	INT	GY.VD
IV_010	Primulaceae Batsch ex Borkh.	Coris monspeliensis	Coris monspeliensis L.	373	SUBT	fraccassati & spasimati; à i	ruptures & spasms; those suffering from	INT	MU.IN
IV_010	Primulaceae Batsch ex Borkh.	Coris monspeliensis	Coris monspeliensis L.	373	SUBT	gorgozzule; asprezza del	roughness of the trachea	INT	RE.CO
IV_010	Primulaceae Batsch ex Borkh.	Coris monspeliensis	Coris monspeliensis L.	373	SUBT	sputi del sangue	bloody cough	INT	RE.CO
IV_010	Primulaceae Batsch ex Borkh.	Coris monspeliensis	Coris monspeliensis L.	373	SUBT	polmone; difetti del (mondificare)	lung defects (to cleanse)	INT	RE.OT
IV_010	Primulaceae Batsch ex Borkh.	Coris monspeliensis	Coris monspeliensis L.	373	SUBT	ferite fresche (consolidare)	fresh wounds (to close)	EXT	SK.WO
IV_010	Primulaceae Batsch ex Borkh.	Coris monspeliensis	Coris monspeliensis L.	373	SUBT	reni; dolori delle	kidney pain	INT	UR.OT
I_137	Rosaceae Juss.	Cormus domestica	Cormus domestica (L.) Spach	530	FRU	mangiare (ristringere il corpo)	food (to constrict the belly)	INT	FOOD
I_137	Rosaceae Juss.	Cormus domestica	Cormus domestica (L.) Spach	530	FRU	corpo (ristagnare)	diarrhoea (to check)	INT	GA.DI
I_136	Cornaceae Bercht. & J.Presl	Cornus mas	Cornus mas L.	124	FRU	cibo	food	INT	FOOD
I_136	Cornaceae Bercht. & J.Presl	Cornus mas	Cornus mas L.	124	FRU	disenteria	dysentery	INT	GA.DI
I_136	Cornaceae Bercht. & J.Presl	Cornus mas	Cornus mas L.	124	FRU	flussi del corpo (ristagnare)	diarrhoea (to stop)	INT	GA.DI
I_136	Cornaceae Bercht. & J.Presl	Cornus mas	Cornus mas L.	125	LEAF	impetigini	impetigo	EXT	SK.IF
IV_194	Fabaceae Lindl.	Coronilla scorpioides	Coronilla scorpioides (L.) W.D.J.Koch	662	HERB	punture de gli scorpioni	scorpion stings	EXT	SK.AB
I_143	Betulaceae Gray	Corylus avellana	Corylus avellana L.	129	SEED	catarrhi (maturare)	catarrhs (to dissolve)	INT	RE.CO
I_143	Betulaceae Gray	Corylus avellana	Corylus avellana L.	129	SEED	tosse vecchia	chronic cough	INT	RE.CO
I_143	Betulaceae Gray	Corylus avellana	Corylus avellana L.	129	SEED	capelli (fare rinascere)	hair (to let regrow)	EXT	SK.CO
I_134b	Rosaceae Juss.	Crataegus azarolus	Crataegus azarolus L.	121	FRU	aggradevole allo stomaco (constringere)	good for the stomach (constringing)	INT	FOOD
I_134b	Rosaceae Juss.	Crataegus azarolus	Crataegus azarolus L.	121	FRU	mangiare	food	INT	FOOD
I_134b	Rosaceae Juss.	Crataegus azarolus	Crataegus azarolus L.	121	FRU	ventre (strignere)	belly (to constringe)	INT	GA.DI
I_134a	Rosaceae Juss.	Crataegus germanica	Crataegus germanica (L.) Kuntze	122	FRU	buono da mangiare	food	INT	FOOD
I_103	Rosaceae Juss.	Crataegus sp.	Crataegus sp.	524	FRU	flussi del corpo (ristagnare)	diarrhoea (to stop)	INT	GA.DI
I_103	Rosaceae Juss.	Crataegus sp.	Crataegus sp.	524	FRU	flussi delle donne (ristagnare)	vaginal discharge (to check)	INT	GY.VD
III_147	Convolvulaceae Juss.	Cressa cretica	Cressa cretica L.	345	SUBT	madrice; infiammagioni della (mollificare)	inflammations of the uterus (to cure)	CLY	GY.UT
III_147	Convolvulaceae Juss.	Cressa cretica	Cressa cretica L.	345	SUBT	mal caduco	epilepsy	INT	NS.VA
III_147	Convolvulaceae Juss.	Cressa cretica	Cressa cretica L.	345	SUBT	ferite (medicare)	wounds (to medicate)	EXT	SK.WO
III_147	Convolvulaceae Juss.	Cressa cretica	Cressa cretica L.	345	SUBT	orinare; difficoltà d'	urinary retention	INT	UR.OT
III_147	Convolvulaceae Juss.	Cressa cretica	Cressa cretica L.	345	SUBT	reni; difetti delle	kidney defects	INT	UR.OT
II_118	Apiaceae Lindl.	Crithmum maritimum	Crithmum maritimum L.	177	LEAF	mangiare	food	INT	FOOD
II_118	Apiaceae Lindl.	Crithmum maritimum	Crithmum maritimum L.	177	LEAF	trabocco di fiele	Overflow of bile (jaundice)	INT	GA.LI
II_118	Apiaceae Lindl.	Crithmum maritimum	Crithmum maritimum L.	177	LEAF	mestrui (provocare)	menstruation (to induce)	INT	GY.AE
II_118	Apiaceae Lindl.	Crithmum maritimum	Crithmum maritimum L.	177	LEAF	orina; angoscie dell'	urinary retention	INT	UR.OT
II_118	Apiaceae Lindl.	Crithmum maritimum	Crithmum maritimum L.	178	SEED (Fruit)	trabocco di fiele	Overflow of bile (jaundice)	INT	GA.LI
II_118	Apiaceae Lindl.	Crithmum maritimum	Crithmum maritimum L.	178	SEED (Fruit)	mestrui (provocare)	menstruation (to induce)	INT	GY.AE
II_118	Apiaceae Lindl.	Crithmum maritimum	Crithmum maritimum L.	178	SEED (Fruit)	orina; angoscie dell'	urinary retention	INT	UR.OT
II_118	Apiaceae Lindl.	Crithmum maritimum	Crithmum maritimum L.	540	SUBT	trabocco di fiele	Overflow of bile (jaundice)	INT	GA.LI
II_118	Apiaceae Lindl.	Crithmum maritimum	Crithmum maritimum L.	540	SUBT	mestrui (provocare)	menstruation (to induce)	INT	GY.AE
II_118	Apiaceae Lindl.	Crithmum maritimum	Crithmum maritimum L.	540	SUBT	orina; angoscie dell'	urinary retention	INT	UR.OT
I_026	Iridaceae Juss.	Crocus sativus	Crocus sativus L.	13	FLOW	occhi; caligini de gli (nettare)	cataract (to wash)	EXT	EYES
I_025	Iridaceae Juss.	Crocus sativus	Crocus sativus L.	13	FLOW	occhi; flussi de gli (fermare)	watery eyes (to stop)	EXT	EYES
I_025	Iridaceae Juss.	Crocus sativus	Crocus sativus L.	13	FLOW	tingere i cibi	colouring agent in food	INT	FOOD
I_025	Iridaceae Juss.	Crocus sativus	Crocus sativus L.	13	FLOW	natura delle donne; per la	female reproductive organs; for	EXT	GY.OT
I_025	Iridaceae Juss.	Crocus sativus	Crocus sativus L.	13	FLOW	natura delle donne; per la	female reproductive organs; for	CLY	GY.OT
I_025	Iridaceae Juss.	Crocus sativus	Crocus sativus L.	13	FLOW	ebbriachezza; contra alla	inebriation	INT	NS.VA
I_025	Iridaceae Juss.	Crocus sativus	Crocus sativus L.	13	FLOW	ammazzare	to kill	INT	POIS
I_025	Iridaceae Juss.	Crocus sativus	Crocus sativus L.	13	FLOW	infiammagioni, che tendono al fuoco sacro	erysipelas	EXT	SK.IF
I_025	Iridaceae Juss.	Crocus sativus	Crocus sativus L.	13	FLOW	posteme delle orecchie	abscesses of the ear	EXT	SK.IF
I_026	Iridaceae Juss.	Crocus sativus	Crocus sativus L.	13	FLOW	orina (provocare)	diuretic	INT	UR.DI
I_025	Iridaceae Juss.	Crocus sativus	Crocus sativus L.	13	FLOW	orina (provocare)	diuretic	INT	UR.DI
I_025	Iridaceae Juss.	Crocus sativus	Crocus sativus L.	13	FLOW	sedere	buttocks	CLY	VAR
I_025	Iridaceae Juss.	Crocus sativus	Crocus sativus L.	13	FLOW	sedere	buttocks	EXT	VAR
I_025	Iridaceae Juss.	Crocus sativus	Crocus sativus L.	513	SUBT	orina (provocare)	diuretic	INT	UR.DI
II_124b	Cucurbitaceae Juss.	Cucumis melo	Cucumis melo L.	542	FRU	occhi; flussi, che scendono à gli (prohibire)	watery eyes (to stop)	EXT	EYES
II_124b	Cucurbitaceae Juss.	Cucumis melo	Cucumis melo L.	542	FRU	occhi; infiammagioni de gli (risolvere)	eye inflammations (to dissolve)	EXT	EYES
II_124b	Cucurbitaceae Juss.	Cucumis melo	Cucumis melo L.	542	FRU	mangiare	food	INT	FOOD
II_124b	Cucurbitaceae Juss.	Cucumis melo	Cucumis melo L.	542	FRU	pelle della faccia (mondificare e fare bella)	facial skin (to cleanse and make beautiful)	EXT	SK.CO
II_124b	Cucurbitaceae Juss.	Cucumis melo	Cucumis melo L.	542	FRU	pannicoli del cervello ne i fanciulli; infiammagioni de i	heatstroke (children)	EXT	SK.IN
II_124b	Cucurbitaceae Juss.	Cucumis melo	Cucumis melo L.	542	FRU	orina (provocare)	diuretic	INT	UR.DI
II_124b	Cucurbitaceae Juss.	Cucumis melo	Cucumis melo L.	185	SEED	pelle della faccia (mondificare e fare bella)	facial skin (to cleanse and make beautiful)	EXT	SK.CO
II_124b	Cucurbitaceae Juss.	Cucumis melo	Cucumis melo L.	186	SUBT	vomitare (fare)	vomiting (to induce)	INT	GA.PL
II_124b	Cucurbitaceae Juss.	Cucumis melo	Cucumis melo L.	186	SUBT	favi; ulcere, che chiamano (sanare)	ulcers (to cure)	EXT	SK.UL
II_124a	Cucurbitaceae Juss.	Cucumis sativus	Cucumis sativus L.	595	FRU	stomaco; utile allo	stomach; good for the	INT	GA.FU
II_124a	Cucurbitaceae Juss.	Cucumis sativus	Cucumis sativus L.	595	FRU	tramortiti (rilevare)	revitalize the stunned	FUMI	NS.VA
II_124a	Cucurbitaceae Juss.	Cucumis sativus	Cucumis sativus L.	595	FRU	vescica; alla	bladder	INT	UR.OT
II_124a	Cucurbitaceae Juss.	Cucumis sativus	Cucumis sativus L.	708	LEAF	cani; à i morsi de	dog bites	EXT	SK.AB
II_124a	Cucurbitaceae Juss.	Cucumis sativus	Cucumis sativus L.	708	LEAF	epinittidi	pustules	EXT	SK.IF
II_124a	Cucurbitaceae Juss.	Cucumis sativus	Cucumis sativus L.	587	SEED	orina (provocare)	diuretic	INT	UR.DI
II_124a	Cucurbitaceae Juss.	Cucumis sativus	Cucumis sativus L.	587	SEED	vescica; ulcere della	ulcers of the bladder	INT	UR.OT
III_063	Apiaceae Lindl.	Cuminum cyminum	Cuminum cyminum L.	277	SEED (Fruit)	velenosi animali; à i morsi de	venomous animal bites	INT	ANTI
III_063	Apiaceae Lindl.	Cuminum cyminum	Cuminum cyminum L.	277	SEED (Fruit)	corpo; dolori del	abdominal pain	EXT	GA.FU
III_063	Apiaceae Lindl.	Cuminum cyminum	Cuminum cyminum L.	277	SEED (Fruit)	corpo; dolori del	abdominal pain	CLY	GA.FU
III_063	Apiaceae Lindl.	Cuminum cyminum	Cuminum cyminum L.	277	SEED (Fruit)	corpo; ventosità del	flatulence	EXT	GA.FU
III_063	Apiaceae Lindl.	Cuminum cyminum	Cuminum cyminum L.	277	SEED (Fruit)	corpo; ventosità del	flatulence	CLY	GA.FU
III_063	Apiaceae Lindl.	Cuminum cyminum	Cuminum cyminum L.	277	SEED (Fruit)	mestrui (ristagnare)	menstrual bleeding (to staunch)	CLY	GY.VD
III_063	Apiaceae Lindl.	Cuminum cyminum	Cuminum cyminum L.	277	SEED (Fruit)	naso; sangue del (ristagnare)	epistaxis (to stop)	EXT	NOSE
III_063	Apiaceae Lindl.	Cuminum cyminum	Cuminum cyminum L.	277	SEED (Fruit)	respirare; à i difetti del	breathing difficulties	INT	RE.BD
III_063	Apiaceae Lindl.	Cuminum cyminum	Cuminum cyminum L.	277	SEED (Fruit)	corpo (impallidire)	body (to whiten)	EXT	SK.CO
III_063	Apiaceae Lindl.	Cuminum cyminum	Cuminum cyminum L.	277	SEED (Fruit)	testicoli; posteme de i	scrotal abscesses	EXT	SK.IF
I_083	Cupressaceae Gray	Cupressus sempervirens	Cupressus sempervirens L.	56	FRU	disenteria	dysentery	INT	GA.DI
I_083	Cupressaceae Gray	Cupressus sempervirens	Cupressus sempervirens L.	56	FRU	flussi del corpo	diarrhoea	INT	GA.DI
I_083	Cupressaceae Gray	Cupressus sempervirens	Cupressus sempervirens L.	56	FRU	hernie intestinali	hernia	EXT	GA.FU
I_083	Cupressaceae Gray	Cupressus sempervirens	Cupressus sempervirens L.	56	FRU	naso; polipi del	polyps	EXT	NOSE
I_083	Cupressaceae Gray	Cupressus sempervirens	Cupressus sempervirens L.	56	FRU	asma	asthma	INT	RE.BD
I_083	Cupressaceae Gray	Cupressus sempervirens	Cupressus sempervirens L.	56	FRU	fiato; strettura de	shortness of breath	INT	RE.BD
I_083	Cupressaceae Gray	Cupressus sempervirens	Cupressus sempervirens L.	56	FRU	sputi del sangue	bloody cough	INT	RE.CO
I_083	Cupressaceae Gray	Cupressus sempervirens	Cupressus sempervirens L.	56	FRU	tosse	cough	INT	RE.CO
I_083	Cupressaceae Gray	Cupressus sempervirens	Cupressus sempervirens L.	56	FRU	zanzare (cacciare via)	mosquito repellent	FUMI	REPE
I_083	Cupressaceae Gray	Cupressus sempervirens	Cupressus sempervirens L.	56	FRU	unghie scabrose (fare cadere)	deteriorated fingernails (to make fall out)	EXT	SK.CO
I_083	Cupressaceae Gray	Cupressus sempervirens	Cupressus sempervirens L.	56	FRU	durezze (mollificare)	indurations (to soften)	INT	SK.OT
I_083	Cupressaceae Gray	Cupressus sempervirens	Cupressus sempervirens L.	55	LEAF	occhi; infiammagioni de gli	eye inflammations	EXT	EYES
I_083	Cupressaceae Gray	Cupressus sempervirens	Cupressus sempervirens L.	55	LEAF	hernie intestinale (consolidare)	hernia (to repair)	EXT	GA.FU
I_083	Cupressaceae Gray	Cupressus sempervirens	Cupressus sempervirens L.	55	LEAF	zanzare (cacciare via)	mosquito repellent	FUMI	REPE
I_083	Cupressaceae Gray	Cupressus sempervirens	Cupressus sempervirens L.	55	LEAF	neri i capelli (fare)	hair (to dye black)	EXT	SK.CO
I_083	Cupressaceae Gray	Cupressus sempervirens	Cupressus sempervirens L.	55	LEAF	fuoco sacro	erysipelas	EXT	SK.IF
I_083	Cupressaceae Gray	Cupressus sempervirens	Cupressus sempervirens L.	55	LEAF	occhi; carboni de gli	carbuncles of the eye	EXT	SK.IF
I_083	Cupressaceae Gray	Cupressus sempervirens	Cupressus sempervirens L.	55	LEAF	ulcere	ulcers	EXT	SK.UL
I_083	Cupressaceae Gray	Cupressus sempervirens	Cupressus sempervirens L.	55	LEAF	ferite (consolidare, ristagnare sangue)	wounds (to close)	EXT	SK.WO
I_083	Cupressaceae Gray	Cupressus sempervirens	Cupressus sempervirens L.	55	LEAF	orina ritenuta	diuresis (to promote)	INT	UR.DI
I_083	Cupressaceae Gray	Cupressus sempervirens	Cupressus sempervirens L.	55	LEAF	vescica; flussi, che scendono alla	bladder incontinence	INT	UR.OT
IV_179	Convolvulaceae Juss.	Cuscuta sp.	Cuscuta sp.	488	HERB	ventosi; à i	flatulence	INT	GA.FU
IV_179	Convolvulaceae Juss.	Cuscuta sp.	Cuscuta sp.	488	HERB	flemma & melancholia; per disotto (purgare)	phlegm & black bile (to purge downwards)	INT	HMM
IV_179	Convolvulaceae Juss.	Cuscuta sp.	Cuscuta sp.	488	HERB	melancholici; à i	melancholics	INT	NS.PS
II_153	Primulaceae Batsch ex Borkh.	Cyclamen sp.	Cyclamen repandum Sm.	206	SUBT	contra à tutti i veleni	antidote	INT	ANTI
II_153	Primulaceae Batsch ex Borkh.	Cyclamen sp.	Cyclamen repandum Sm.	206	SUBT	lepre marina; contra al veleno della	antidote (sea hares)	INT	ANTI
II_153	Primulaceae Batsch ex Borkh.	Cyclamen sp.	Cyclamen repandum Sm.	206	SUBT	occhi; debolezze de gli	visual impairments	EXT	EYES
II_153	Primulaceae Batsch ex Borkh.	Cyclamen sp.	Cyclamen repandum Sm.	206	SUBT	occhi; suffusioni de gli	cataract	EXT	EYES
II_153	Primulaceae Batsch ex Borkh.	Cyclamen sp.	Cyclamen repandum Sm.	206	SUBT	budella; quando esce fuori (riduire)	rectal prolapse (to reduce)	EXT	GA.FU
II_153	Primulaceae Batsch ex Borkh.	Cyclamen sp.	Cyclamen repandum Sm.	206	SUBT	trabocco di fiele	Overflow of bile (jaundice)	INT	GA.LI
II_153	Primulaceae Batsch ex Borkh.	Cyclamen sp.	Cyclamen repandum Sm.	206	SUBT	corpo (fare andare)	digestion (to advance)	CLY	GA.PL
II_153	Primulaceae Batsch ex Borkh.	Cyclamen sp.	Cyclamen repandum Sm.	206	SUBT	corpo (mollificare)	belly (to soften)	EXT	GA.PL
II_153	Primulaceae Batsch ex Borkh.	Cyclamen sp.	Cyclamen repandum Sm.	206	SUBT	podagre	gout	EXT	GOUT
II_153	Primulaceae Batsch ex Borkh.	Cyclamen sp.	Cyclamen repandum Sm.	206	SUBT	fare sconciare	to abort	INT	GY.AE
II_153	Primulaceae Batsch ex Borkh.	Cyclamen sp.	Cyclamen repandum Sm.	206	SUBT	fare sconciare	to abort	EXT	GY.AE
II_153	Primulaceae Batsch ex Borkh.	Cyclamen sp.	Cyclamen repandum Sm.	206	SUBT	mestrui (provocare)	menstruation (to induce)	INT	GY.AE
II_153	Primulaceae Batsch ex Borkh.	Cyclamen sp.	Cyclamen repandum Sm.	206	SUBT	mestrui (provocare)	menstruation (to induce)	CLY	GY.AE
II_153	Primulaceae Batsch ex Borkh.	Cyclamen sp.	Cyclamen repandum Sm.	206	SUBT	flemma; per di sotto (purgare)	phlegm (to purge downwards)	INT	HMM
II_153	Primulaceae Batsch ex Borkh.	Cyclamen sp.	Cyclamen repandum Sm.	206	SUBT	incanti amorosi; à gli (adoperare)	aphrodisiac	INT	LIBI
II_153	Primulaceae Batsch ex Borkh.	Cyclamen sp.	Cyclamen repandum Sm.	206	SUBT	membri smossi	joint dislocations	EXT	MU.EX
II_153	Primulaceae Batsch ex Borkh.	Cyclamen sp.	Cyclamen repandum Sm.	206	SUBT	testa (purgare)	head (to purge)	EXT	NOSE
II_153	Primulaceae Batsch ex Borkh.	Cyclamen sp.	Cyclamen repandum Sm.	206	SUBT	morso dei serpenti	snakebites	EXT	SK.AB
II_153	Primulaceae Batsch ex Borkh.	Cyclamen sp.	Cyclamen repandum Sm.	206	SUBT	capelli cascati per pelagione (fare rinascere)	lost hair (to let regrow)	EXT	SK.CO
II_153	Primulaceae Batsch ex Borkh.	Cyclamen sp.	Cyclamen repandum Sm.	206	SUBT	pelle (purgare & nettare)	skin (to purge & cleanse)	EXT	SK.CO
II_153	Primulaceae Batsch ex Borkh.	Cyclamen sp.	Cyclamen repandum Sm.	206	SUBT	pustole; il nascere delle (prohibire)	formation pustules (to prevent)	EXT	SK.IF
II_153	Primulaceae Batsch ex Borkh.	Cyclamen sp.	Cyclamen repandum Sm.	206	SUBT	bolle; il nascere delle (prohibire)	formation of blisters (to prevent)	EXT	SK.IN
II_153	Primulaceae Batsch ex Borkh.	Cyclamen sp.	Cyclamen repandum Sm.	206	SUBT	bugance	chilblains on hands and feet	EXT	SK.IN
II_153	Primulaceae Batsch ex Borkh.	Cyclamen sp.	Cyclamen repandum Sm.	206	SUBT	faccia cotta dal sole	sunburned face	EXT	SK.IN
II_153	Primulaceae Batsch ex Borkh.	Cyclamen sp.	Cyclamen repandum Sm.	206	SUBT	ulcere (saldare)	ulcers (to close)	EXT	SK.UL
II_153	Primulaceae Batsch ex Borkh.	Cyclamen sp.	Cyclamen repandum Sm.	206	SUBT	ulcere della testa	ulcers of the head	EXT	SK.UL
II_153	Primulaceae Batsch ex Borkh.	Cyclamen sp.	Cyclamen repandum Sm.	206	SUBT	ferite (guarire)	wounds (to cure)	EXT	SK.WO
II_153	Primulaceae Batsch ex Borkh.	Cyclamen sp.	Cyclamen repandum Sm.	206	SUBT	milza (fare disfare)	spleen (to reduce)	EXT	SPLE
II_153	Primulaceae Batsch ex Borkh.	Cyclamen sp.	Cyclamen repandum Sm.	206	SUBT	hidropisie; flemma & acqua delle (purgare di sotto)	oedematous phlegm & water (to draw down)	INT	UR.DI
I_132a	Rosaceae Juss.	Cydonia oblonga	Cydonia oblonga Mill.	115	FLOW	occhi; infiammagioni de gli	eye inflammations	EXT	EYES
I_132a	Rosaceae Juss.	Cydonia oblonga	Cydonia oblonga Mill.	115	FLOW	flussi del corpo	diarrhoea	INT	GA.DI
I_132a	Rosaceae Juss.	Cydonia oblonga	Cydonia oblonga Mill.	115	FLOW	donne; per le flussi delle	vaginal discharge	INT	GY.VD
I_132a	Rosaceae Juss.	Cydonia oblonga	Cydonia oblonga Mill.	115	FLOW	sputi del sangue	bloody cough	INT	RE.CO
I_132a	Rosaceae Juss.	Cydonia oblonga	Cydonia oblonga Mill.	114	FRU	disenterici	dysentery	INT	GA.DI
I_132a	Rosaceae Juss.	Cydonia oblonga	Cydonia oblonga Mill.	114	FRU	flussi del corpo	diarrhoea	INT	GA.DI
I_132a	Rosaceae Juss.	Cydonia oblonga	Cydonia oblonga Mill.	114	FRU	stomaco; infiammagioni dello	inflammations of the stomach	EXT	GA.FU
I_132a	Rosaceae Juss.	Cydonia oblonga	Cydonia oblonga Mill.	114	FRU	stomaco; utile allo	stomach; good for the	INT	GA.FU
I_132a	Rosaceae Juss.	Cydonia oblonga	Cydonia oblonga Mill.	114	FRU	vomiti; per li	vomiting	EXT	GA.FU
I_132a	Rosaceae Juss.	Cydonia oblonga	Cydonia oblonga Mill.	114	FRU	mammelle; infiammagioni delle	inflamed breasts	EXT	GY.BR
I_132a	Rosaceae Juss.	Cydonia oblonga	Cydonia oblonga Mill.	114	FRU	madrice; alle relassationi della	dilated cervix; against	INT	GY.UT
I_132a	Rosaceae Juss.	Cydonia oblonga	Cydonia oblonga Mill.	114	FRU	cholerici; à i	for the choleric person	INT	HMM
I_132a	Rosaceae Juss.	Cydonia oblonga	Cydonia oblonga Mill.	114	FRU	petto; strettura di	dyspnoea	INT	RE.BD
I_132a	Rosaceae Juss.	Cydonia oblonga	Cydonia oblonga Mill.	114	FRU	sputi della marcia	coughing up pus	INT	RE.CO
I_132a	Rosaceae Juss.	Cydonia oblonga	Cydonia oblonga Mill.	114	FRU	posteme del sedere	abscesses of the buttocks	EXT	SK.IF
I_132a	Rosaceae Juss.	Cydonia oblonga	Cydonia oblonga Mill.	114	FRU	infiammagioni del sedere	inflammations of the buttocks	INT	SK.IN
I_132a	Rosaceae Juss.	Cydonia oblonga	Cydonia oblonga Mill.	114	FRU	milza; durezze della	spleen indurations	EXT	SPLE
I_132a	Rosaceae Juss.	Cydonia oblonga	Cydonia oblonga Mill.	114	FRU	orina (provocare)	diuretic	INT	UR.DI
IV_083	Apocynaceae Juss.	Cynanchum acutum	Cynanchum acutum L.	703	LEAF	ammazzare animali vari	to kill various animals	INT	POIS
III_014	Asteraceae Bercht. & J.Presl	Cynara cardunculus	Cynara cardunculus L.	646	HERB	mangiare	food	INT	FOOD
III_014	Asteraceae Bercht. & J.Presl	Cynara cardunculus	Cynara cardunculus L.	243	SUBT	odore delle ditella (levare via)	armpit odour (to remove)	EXT	SK.CO
III_014	Asteraceae Bercht. & J.Presl	Cynara cardunculus	Cynara cardunculus L.	243	SUBT	orina (provocare)	diuretic	INT	UR.DI
IV_032	Poaceae Barnhart	Cynodon dactylon	Cynodon dactylon (L.) Pers.	388	SUBT	budella; dolori delle	intestinal pain	INT	GA.FU
IV_032	Poaceae Barnhart	Cynodon dactylon	Cynodon dactylon (L.) Pers.	388	SUBT	ferite (consolidare)	wounds (to close)	EXT	SK.WO
IV_032	Poaceae Barnhart	Cynodon dactylon	Cynodon dactylon (L.) Pers.	388	SUBT	vescica; pietre della (rompere)	vesical calculi (to crush)	INT	UR.CA
IV_032	Poaceae Barnhart	Cynodon dactylon	Cynodon dactylon (L.) Pers.	388	SUBT	orina ritenuta	diuretic	INT	UR.DI
I_096	Cyperaceae Juss.	Cyperus papyrus	Cyperus papyrus L.	75	HERB	fistole; bocche delle (dilatare)	fistula openings (to dilate)	EXT	SK.CO
I_096	Cyperaceae Juss.	Cyperus papyrus	Cyperus papyrus L.	768	SUBT	nutrire (masticato)	chewable substance	INT	FOOD
I_004	Cyperaceae Juss.	Cyperus rotundus	Cyperus rotundus L.	2	SUBT	scorpioni; punture de gli	scorpion stings	INT	ANTI
I_004	Cyperaceae Juss.	Cyperus rotundus	Cyperus rotundus L.	2	SUBT	mestrui (provocare)	menstruation (to induce)	FUMI	GY.AE
I_004	Cyperaceae Juss.	Cyperus rotundus	Cyperus rotundus L.	2	SUBT	natura delle donne, frigidità alla (medicare)	uterine chills	FUMI	GY.UT
I_004	Cyperaceae Juss.	Cyperus rotundus	Cyperus rotundus L.	2	SUBT	natura delle donne, oppilationi della (medicare)	uterine obstruction (to medicate)	FUMI	GY.UT
I_004	Cyperaceae Juss.	Cyperus rotundus	Cyperus rotundus L.	2	SUBT	bocca; piaghe corrosive della	mouth sores	EXT	MOUTH
I_004	Cyperaceae Juss.	Cyperus rotundus	Cyperus rotundus L.	2	SUBT	pietra	urinary calculi	INT	UR.CA
I_004	Cyperaceae Juss.	Cyperus rotundus	Cyperus rotundus L.	2	SUBT	hidropici	dropsy	INT	UR.DI
I_004	Cyperaceae Juss.	Cyperus rotundus	Cyperus rotundus L.	2	SUBT	orina (provocare)	diuretic	INT	UR.DI
I_108	Cytinaceae A.Rich.	Cytinus sp.	Cytinus hypocistis (L.) L.	88	HERB	flussi disenterici (ristagnare)	dysentery (to stop)	INT	GA.DI
I_108	Cytinaceae A.Rich.	Cytinus sp.	Cytinus hypocistis (L.) L.	88	HERB	flussi disenterici (ristagnare)	dysentery (to stop)	CLY	GA.DI
I_108	Cytinaceae A.Rich.	Cytinus sp.	Cytinus hypocistis (L.) L.	88	HERB	flussi stomacali (ristagnare)	diarrhoea (to stop)	INT	GA.DI
I_108	Cytinaceae A.Rich.	Cytinus sp.	Cytinus hypocistis (L.) L.	88	HERB	flussi stomacali (ristagnare)	diarrhoea (to stop)	CLY	GA.DI
I_108	Cytinaceae A.Rich.	Cytinus sp.	Cytinus hypocistis (L.) L.	88	HERB	flussi delle donne; à i	vaginal discharge	INT	GY.VD
I_108	Cytinaceae A.Rich.	Cytinus sp.	Cytinus hypocistis (L.) L.	88	HERB	sputi del sangue	bloody cough	INT	RE.CO
IV_046	Asparagaceae Juss.	Danae racemosa	Danae racemosa (L.) Moench	400	SUBT	flussi del corpo	diarrhoea	INT	GA.DI
IV_046	Asparagaceae Juss.	Danae racemosa	Danae racemosa (L.) Moench	400	SUBT	mestrui (ristagnare)	menstrual bleeding (to staunch)	INT	GY.VD
IV_174	Thymelaeaceae Juss.	Daphne gnidium	Daphne gnidium L.	26	LEAF	humori acquosi (purgare)	watery humours (to purge)	INT	HMM
IV_174	Thymelaeaceae Juss.	Daphne gnidium	Daphne gnidium L.	516	SEED	purgare	to purge	INT	GA.PL
IV_174	Thymelaeaceae Juss.	Daphne gnidium	Daphne gnidium L.	516	SEED	parto (ammazzare)	embryo/foetus (to kill)	CLY	GY.AE
IV_174	Thymelaeaceae Juss.	Daphne gnidium	Daphne gnidium L.	516	SEED	cholera, flemma & humori acquosi (purgare per disotto)	yellow bile, phlegm & watery humours (to purge downwards)	INT	HMM
IV_150	Thymelaeaceae Juss.	Daphne laureola	Daphne laureola L.	697	FRU	corpo (purgare)	belly (to purge)	INT	GA.PL
IV_150	Thymelaeaceae Juss.	Daphne laureola	Daphne laureola L.	463	LEAF	vomitare (fare)	vomiting (to induce)	INT	GA.PL
IV_150	Thymelaeaceae Juss.	Daphne laureola	Daphne laureola L.	463	LEAF	mestrui (provocare)	menstruation (to induce)	INT	GY.AE
IV_150	Thymelaeaceae Juss.	Daphne laureola	Daphne laureola L.	463	LEAF	capo; la flemma dal (tirare)	phlegm from the head (to draw out)	INT	NOSE
IV_150	Thymelaeaceae Juss.	Daphne laureola	Daphne laureola L.	463	LEAF	fare starnutare	sneezing (to provoke)	INT	NOSE
IV_150	Thymelaeaceae Juss.	Daphne laureola	Daphne laureola L.	463	LEAF	flemma (solvere)	phlegm (to dissolve)	INT	RE.CO
IV_173	Thymelaeaceae Juss.	Daphne sp.	Daphne oleoides Schreb.	484	LEAF	cholera & flemma (solvere)	yellow bile & phlegm (to resolve)	INT	HMM
IV_173	Thymelaeaceae Juss.	Daphne sp.	Daphne oleoides Schreb.	484	LEAF	ulcere sordide & escharose (purgare)	filthy and spreading ulcers (to purge)	EXT	SK.UL
II_126	Apiaceae Lindl.	Daucus carota	Daucus carota L.	609	HERB	mangiare	food	INT	FOOD
II_126	Apiaceae Lindl.	Daucus carota	Daucus carota L.	609	HERB	orina (provocare)	diuretic	INT	UR.DI
II_126	Apiaceae Lindl.	Daucus carota	Daucus carota L.	609	HERB	vescica; alla	bladder	INT	UR.OT
III_054	Apiaceae Lindl.	Daucus carota	Daucus carota L.	189	LEAF	ulcere corrosive (mondificare)	creeping ulcers (to cleanse)	EXT	SK.UL
III_054	Apiaceae Lindl.	Daucus carota	Daucus carota L.	267	SEED (Fruit)	velenosi animali; à i morsi & punture de i	venomous animal bites & stings	INT	ANTI
III_054	Apiaceae Lindl.	Daucus carota	Daucus carota L.	267	SEED (Fruit)	mestrui (provocare)	menstruation (to induce)	INT	GY.AE
III_054	Apiaceae Lindl.	Daucus carota	Daucus carota L.	267	SEED (Fruit)	mestrui (provocare)	menstruation (to induce)	CLY	GY.AE
III_054	Apiaceae Lindl.	Daucus carota	Daucus carota L.	267	SEED (Fruit)	fare ingravidare	to make pregnant	INT	GY.OT
III_054	Apiaceae Lindl.	Daucus carota	Daucus carota L.	267	SEED (Fruit)	costato; dolori del	side stitch	INT	NS.PA
III_054	Apiaceae Lindl.	Daucus carota	Daucus carota L.	267	SEED (Fruit)	serpenti (non essere offesi)	snakes (to repel)	INT	REPE
III_054	Apiaceae Lindl.	Daucus carota	Daucus carota L.	267	SEED (Fruit)	hidropici	dropsy	INT	UR.DI
III_054	Apiaceae Lindl.	Daucus carota	Daucus carota L.	267	SEED (Fruit)	orinare; difficoltà d'	urinary retention	INT	UR.OT
III_054	Apiaceae Lindl.	Daucus carota	Daucus carota L.	188	SUBT	buono da mangiare	food	INT	FOOD
III_054	Apiaceae Lindl.	Daucus carota	Daucus carota L.	188	SUBT	fare partorire	to induce labour	CLY	GY.AE
III_054	Apiaceae Lindl.	Daucus carota	Daucus carota L.	188	SUBT	appetiti venerei; à i (favorire)	aphrodisiac	INT	LIBI
III_054	Apiaceae Lindl.	Daucus carota	Daucus carota L.	188	SUBT	orina (provocare)	diuretic	INT	UR.DI
IV_157	Ranunculaceae Juss.	Delphinium staphisagria	Delphinium staphisagria L.	469	SEED	humori grossi (purgare per vomito)	thick humours (to purge through vomiting)	INT	HMM
IV_157	Ranunculaceae Juss.	Delphinium staphisagria	Delphinium staphisagria L.	469	SEED	gengive; flussi delle (ristagnare)	gingivitis	EXT	MOUTH
IV_157	Ranunculaceae Juss.	Delphinium staphisagria	Delphinium staphisagria L.	469	SEED	ulcere della bocca, che menano (guarire)	spreading oral ulcers (to cure)	EXT	MOUTH
IV_157	Ranunculaceae Juss.	Delphinium staphisagria	Delphinium staphisagria L.	469	SEED	dolore dei denti	toothache	EXT	NS.PA
IV_157	Ranunculaceae Juss.	Delphinium staphisagria	Delphinium staphisagria L.	469	SEED	pidocchi (ammazzare)	lice (to kill)	EXT	PARA
IV_157	Ranunculaceae Juss.	Delphinium staphisagria	Delphinium staphisagria L.	469	SEED	rogna	scabies	EXT	PARA
IV_157	Ranunculaceae Juss.	Delphinium staphisagria	Delphinium staphisagria L.	469	SEED	flemma (fare sputare)	phlegm (to make expectorate)	INT	RE.CO
IV_157	Ranunculaceae Juss.	Delphinium staphisagria	Delphinium staphisagria L.	469	SEED	prurito	pruritus	EXT	SK.IN
I_110	Ebenaceae Gürke	Diospyros sp.	Diospyros ebenum J.Koenig ex Retz.	90	WOOD	catarri, che discendono della vista	cataracts	INT	EYES
I_110	Ebenaceae Gürke	Diospyros sp.	Diospyros ebenum J.Koenig ex Retz.	90	WOOD	occhi; infirmità secche & scabrose de gli	dry & rough eyes	EXT	EYES
I_110	Ebenaceae Gürke	Diospyros sp.	Diospyros ebenum J.Koenig ex Retz.	90	WOOD	pustule; alle	pustules	EXT	SK.IF
III_011	Caprifoliaceae Juss.	Dipsacus sp.	Dipsacus fullonum L.	242	SUBT	febbre quartana (sanare)	quartan fever (to cure)	EXT	FEVE
III_011	Caprifoliaceae Juss.	Dipsacus sp.	Dipsacus fullonum L.	242	SUBT	fistole (sanare)	fistula (to cure)	EXT	SK.IF
III_011	Caprifoliaceae Juss.	Dipsacus sp.	Dipsacus fullonum L.	242	SUBT	formiche pendenti	pendant warts	EXT	SK.OT
III_011	Caprifoliaceae Juss.	Dipsacus sp.	Dipsacus fullonum L.	242	SUBT	porri (sanare)	warts (to cure)	EXT	SK.OT
III_011	Caprifoliaceae Juss.	Dipsacus sp.	Dipsacus fullonum L.	242	SUBT	sedere; fessure del (sanare)	anal fissures (to cure)	EXT	SK.WO
III_130	Asteraceae Bercht. & J.Presl	Dittrichia sp.	Dittrichia viscosa (L.) Greuter	610	FLOW	budella; dolori delle	intestinal pain	INT	GA.FU
III_130	Asteraceae Bercht. & J.Presl	Dittrichia sp.	Dittrichia viscosa (L.) Greuter	610	FLOW	trabocco di fiele	Overflow of bile (jaundice)	INT	GA.LI
III_130	Asteraceae Bercht. & J.Presl	Dittrichia sp.	Dittrichia viscosa (L.) Greuter	610	FLOW	fare sconciare	to abort	CLY	GY.AE
III_130	Asteraceae Bercht. & J.Presl	Dittrichia sp.	Dittrichia viscosa (L.) Greuter	610	FLOW	mestrui (provocare)	menstruation (to induce)	INT	GY.AE
III_130	Asteraceae Bercht. & J.Presl	Dittrichia sp.	Dittrichia viscosa (L.) Greuter	610	FLOW	parto (provocare)	delivery (to induce)	INT	GY.AE
III_130	Asteraceae Bercht. & J.Presl	Dittrichia sp.	Dittrichia viscosa (L.) Greuter	610	FLOW	madrice; difetti della (medicare)	uterine defects (to medicate)	EXT	GY.UT
III_130	Asteraceae Bercht. & J.Presl	Dittrichia sp.	Dittrichia viscosa (L.) Greuter	610	FLOW	distillationi dell'orina; alle	to pass water (diuresis)	INT	UR.DI
III_130	Asteraceae Bercht. & J.Presl	Dittrichia sp.	Dittrichia viscosa (L.) Greuter	335	HERB	fare sconciare	to abort	CLY	GY.AE
III_130	Asteraceae Bercht. & J.Presl	Dittrichia sp.	Dittrichia viscosa (L.) Greuter	335	HERB	mestrui (provocare)	menstruation (to induce)	INT	GY.AE
III_130	Asteraceae Bercht. & J.Presl	Dittrichia sp.	Dittrichia viscosa (L.) Greuter	335	HERB	dolori di testa (sanare)	headache (to cure)	EXT	NS.PA
III_130	Asteraceae Bercht. & J.Presl	Dittrichia sp.	Dittrichia viscosa (L.) Greuter	335	HERB	tremore; al	tremor	EXT	NS.VA
III_130	Asteraceae Bercht. & J.Presl	Dittrichia sp.	Dittrichia viscosa (L.) Greuter	335	HERB	ammazzare pulci	to kill fleas	FUMI	POIS
III_130	Asteraceae Bercht. & J.Presl	Dittrichia sp.	Dittrichia viscosa (L.) Greuter	335	HERB	ammazzare pulci	to kill fleas	EXT	POIS
III_130	Asteraceae Bercht. & J.Presl	Dittrichia sp.	Dittrichia viscosa (L.) Greuter	335	HERB	culici (cacciare)	mosquitoes (to repel)	FUMI	REPE
III_130	Asteraceae Bercht. & J.Presl	Dittrichia sp.	Dittrichia viscosa (L.) Greuter	335	HERB	culici (cacciare)	mosquitoes (to repel)	EXT	REPE
III_130	Asteraceae Bercht. & J.Presl	Dittrichia sp.	Dittrichia viscosa (L.) Greuter	335	HERB	serpenti (cacciare)	snakes (to repel)	FUMI	REPE
III_130	Asteraceae Bercht. & J.Presl	Dittrichia sp.	Dittrichia viscosa (L.) Greuter	335	HERB	serpenti (cacciare)	snakes (to repel)	EXT	REPE
III_130	Asteraceae Bercht. & J.Presl	Dittrichia sp.	Dittrichia viscosa (L.) Greuter	335	HERB	morsi delle serpenti	snakebites	EXT	SK.AB
III_130	Asteraceae Bercht. & J.Presl	Dittrichia sp.	Dittrichia viscosa (L.) Greuter	335	HERB	ferite	wounds	EXT	SK.WO
III_130	Asteraceae Bercht. & J.Presl	Dittrichia sp.	Dittrichia viscosa (L.) Greuter	335	HERB	bruschi	bruschi	EXT	VAR
III_130	Asteraceae Bercht. & J.Presl	Dittrichia sp.	Dittrichia viscosa (L.) Greuter	335	HERB	freddo; al	cold; against	EXT	VAR
III_130	Asteraceae Bercht. & J.Presl	Dittrichia sp.	Dittrichia viscosa (L.) Greuter	336	LEAF	budella; dolori delle	intestinal pain	INT	GA.FU
III_130	Asteraceae Bercht. & J.Presl	Dittrichia sp.	Dittrichia viscosa (L.) Greuter	336	LEAF	trabocco di fiele	Overflow of bile (jaundice)	INT	GA.LI
III_130	Asteraceae Bercht. & J.Presl	Dittrichia sp.	Dittrichia viscosa (L.) Greuter	336	LEAF	parto (provocare)	delivery (to induce)	INT	GY.AE
III_130	Asteraceae Bercht. & J.Presl	Dittrichia sp.	Dittrichia viscosa (L.) Greuter	336	LEAF	madrice; difetti della (medicare)	uterine defects (to medicate)	EXT	GY.UT
III_130	Asteraceae Bercht. & J.Presl	Dittrichia sp.	Dittrichia viscosa (L.) Greuter	336	LEAF	distillationi dell'orina; alle	to pass water (diuresis)	INT	UR.DI
II_156	Araceae Juss.	Dracunculus vulgaris	Dracunculus vulgaris Schott	664	FLOW	parto (ammazzare)	embryo/foetus (to kill)	FUMI	GY.AE
II_155	Araceae Juss.	Dracunculus vulgaris	Dracunculus vulgaris Schott	207	LEAF	morsi dalle vipere	bites of vipers	EXT	SK.AB
II_156	Araceae Juss.	Dracunculus vulgaris	Dracunculus vulgaris Schott	207	LEAF	morsi dalle vipere	bites of vipers	EXT	SK.AB
II_156	Araceae Juss.	Dracunculus vulgaris	Dracunculus vulgaris Schott	207	LEAF	vitiligini (spegnere)	vitiligo (to remove)	EXT	SK.CO
II_156	Araceae Juss.	Dracunculus vulgaris	Dracunculus vulgaris Schott	207	LEAF	bugance	chilblains on hands and feet	EXT	SK.IN
II_155	Araceae Juss.	Dracunculus vulgaris	Dracunculus vulgaris Schott	207	LEAF	bugance	chilblains on hands and feet	EXT	SK.IN
II_156	Araceae Juss.	Dracunculus vulgaris	Dracunculus vulgaris Schott	207	LEAF	ferite fresche	fresh wounds	EXT	SK.WO
II_155	Araceae Juss.	Dracunculus vulgaris	Dracunculus vulgaris Schott	207	LEAF	ferite fresche	fresh wounds	EXT	SK.WO
II_156	Araceae Juss.	Dracunculus vulgaris	Dracunculus vulgaris Schott	548	SEED (Fruit)	fare sconciare	to abort	INT	GY.AE
II_155	Araceae Juss.	Dracunculus vulgaris	Dracunculus vulgaris Schott	548	SEED (Fruit)	fare sconciare	to abort	INT	GY.AE
II_156	Araceae Juss.	Dracunculus vulgaris	Dracunculus vulgaris Schott	548	SEED (Fruit)	polipi (stirpare fuori)	polyps (to remove)	EXT	NOSE
II_156	Araceae Juss.	Dracunculus vulgaris	Dracunculus vulgaris Schott	548	SEED (Fruit)	orecchie; dolori delle	earache	EXT	NS.PA
II_155	Araceae Juss.	Dracunculus vulgaris	Dracunculus vulgaris Schott	548	SEED (Fruit)	orecchie; dolori delle	earache	EXT	NS.PA
II_156	Araceae Juss.	Dracunculus vulgaris	Dracunculus vulgaris Schott	548	SEED (Fruit)	cancheri (fermare)	tumours (to stop)	EXT	SK.OT
II_156	Araceae Juss.	Dracunculus vulgaris	Dracunculus vulgaris Schott	208	SUBT	occhi; caligini de gli	cataract	EXT	EYES
II_155	Araceae Juss.	Dracunculus vulgaris	Dracunculus vulgaris Schott	208	SUBT	occhi; caligini de gli	cataract	EXT	EYES
II_155	Araceae Juss.	Dracunculus vulgaris	Dracunculus vulgaris Schott	208	SUBT	occhi; fiocchi de gli	visual impairments	EXT	EYES
II_156	Araceae Juss.	Dracunculus vulgaris	Dracunculus vulgaris Schott	208	SUBT	occhi; fiocchi de gli	visual impairments	EXT	EYES
II_155	Araceae Juss.	Dracunculus vulgaris	Dracunculus vulgaris Schott	208	SUBT	occhi; medicine de gli	eye medicine	EXT	EYES
II_156	Araceae Juss.	Dracunculus vulgaris	Dracunculus vulgaris Schott	208	SUBT	occhi; nuvolette de gli	blurred vision	EXT	EYES
II_155	Araceae Juss.	Dracunculus vulgaris	Dracunculus vulgaris Schott	208	SUBT	occhi; nuvolette de gli	blurred vision	EXT	EYES
II_156	Araceae Juss.	Dracunculus vulgaris	Dracunculus vulgaris Schott	208	SUBT	cibo	food	INT	FOOD
II_155	Araceae Juss.	Dracunculus vulgaris	Dracunculus vulgaris Schott	208	SUBT	creatura nella madrice (tirare fuori)	embryo/foetus (to expel)	CLY	GY.AE
II_156	Araceae Juss.	Dracunculus vulgaris	Dracunculus vulgaris Schott	208	SUBT	fare partorire	to induce labour	CLY	GY.AE
II_155	Araceae Juss.	Dracunculus vulgaris	Dracunculus vulgaris Schott	208	SUBT	fare sconciare	to abort	FUMI	GY.AE
II_156	Araceae Juss.	Dracunculus vulgaris	Dracunculus vulgaris Schott	208	SUBT	appetiti venerei (accendere)	aphrodisiac	INT	LIBI
II_155	Araceae Juss.	Dracunculus vulgaris	Dracunculus vulgaris Schott	208	SUBT	appetiti venerei (muovere)	aphrodisiac	INT	LIBI
II_156	Araceae Juss.	Dracunculus vulgaris	Dracunculus vulgaris Schott	208	SUBT	rotti e spasimati; à i	for the ruptured and the spastics	INT	MU.IN
II_155	Araceae Juss.	Dracunculus vulgaris	Dracunculus vulgaris Schott	208	SUBT	rotti e spasimati; à i	for the ruptured and the spastics	INT	MU.IN
II_155	Araceae Juss.	Dracunculus vulgaris	Dracunculus vulgaris Schott	208	SUBT	polipi (stirpare)	polyps (to remove)	EXT	NOSE
II_155	Araceae Juss.	Dracunculus vulgaris	Dracunculus vulgaris Schott	208	SUBT	asmatici	asthmatics	INT	RE.BD
II_156	Araceae Juss.	Dracunculus vulgaris	Dracunculus vulgaris Schott	208	SUBT	asmatici	asthmatics	INT	RE.BD
II_156	Araceae Juss.	Dracunculus vulgaris	Dracunculus vulgaris Schott	208	SUBT	catarri	catarrhs	INT	RE.CO
II_155	Araceae Juss.	Dracunculus vulgaris	Dracunculus vulgaris Schott	208	SUBT	catarri, che discendono dal capo; à i	catarrhs descending from the head	INT	RE.CO
II_156	Araceae Juss.	Dracunculus vulgaris	Dracunculus vulgaris Schott	208	SUBT	petto; sputo de gli humori del (facilitare)	expectoration (to facilitate)	INT	RE.CO
II_156	Araceae Juss.	Dracunculus vulgaris	Dracunculus vulgaris Schott	208	SUBT	tosse	cough	INT	RE.CO
II_155	Araceae Juss.	Dracunculus vulgaris	Dracunculus vulgaris Schott	208	SUBT	tosse	cough	INT	RE.CO
II_155	Araceae Juss.	Dracunculus vulgaris	Dracunculus vulgaris Schott	208	SUBT	morsi dalle vipere	bites of vipers	EXT	SK.AB
II_155	Araceae Juss.	Dracunculus vulgaris	Dracunculus vulgaris Schott	208	SUBT	vitiligini (spegnere)	vitiligo (to remove)	EXT	SK.CO
II_155	Araceae Juss.	Dracunculus vulgaris	Dracunculus vulgaris Schott	208	SUBT	fistole (lavare)	fistula (to clean)	EXT	SK.IF
II_156	Araceae Juss.	Dracunculus vulgaris	Dracunculus vulgaris Schott	208	SUBT	fistole (medicare)	fistula (to medicate)	EXT	SK.IF
II_155	Araceae Juss.	Dracunculus vulgaris	Dracunculus vulgaris Schott	208	SUBT	cancheri (stirpare)	tumours (to extirpate)	EXT	SK.OT
II_155	Araceae Juss.	Dracunculus vulgaris	Dracunculus vulgaris Schott	208	SUBT	ulcere maligne & corrosive (purgare)	malignant & creeping ulcers (to purge)	EXT	SK.UL
II_156	Araceae Juss.	Dracunculus vulgaris	Dracunculus vulgaris Schott	208	SUBT	ulcere maligne & corrosive (saldare)	malignant & creeping ulcers (to close)	EXT	SK.UL
II_156	Araceae Juss.	Dracunculus vulgaris	Dracunculus vulgaris Schott	208	SUBT	fare orinare	diuretic	INT	UR.DI
II_162	Asparagaceae Juss.	Drimia maritima	Drimia maritima (L.) Stearn	218	SEED	corpo (mollificare)	belly (to soften)	INT	GA.PL
II_162	Asparagaceae Juss.	Drimia maritima	Drimia maritima (L.) Stearn	217	SUBT	corpo; dolori di	abdominal pain	INT	GA.FU
II_162	Asparagaceae Juss.	Drimia maritima	Drimia maritima (L.) Stearn	217	SUBT	digestione (corraborare)	digestif	INT	GA.FU
II_162	Asparagaceae Juss.	Drimia maritima	Drimia maritima (L.) Stearn	217	SUBT	stomaco; debolezze dello	stomach; weaknesses of the	INT	GA.FU
II_162	Asparagaceae Juss.	Drimia maritima	Drimia maritima (L.) Stearn	217	SUBT	stomaco; debolezze dello	stomach; weaknesses of the	FUMI	GA.FU
II_162	Asparagaceae Juss.	Drimia maritima	Drimia maritima (L.) Stearn	217	SUBT	stomaco; vomiti dello	vomiting	INT	GA.FU
II_162	Asparagaceae Juss.	Drimia maritima	Drimia maritima (L.) Stearn	217	SUBT	stomaco; vomiti dello	vomiting	FUMI	GA.FU
II_162	Asparagaceae Juss.	Drimia maritima	Drimia maritima (L.) Stearn	217	SUBT	vomiti; à	vomiting	INT	GA.FU
II_162	Asparagaceae Juss.	Drimia maritima	Drimia maritima (L.) Stearn	217	SUBT	trabocco di fiele	Overflow of bile (jaundice)	INT	GA.LI
II_162	Asparagaceae Juss.	Drimia maritima	Drimia maritima (L.) Stearn	217	SUBT	corpo (fare andare)	digestion (promote)	INT	GA.PL
II_162	Asparagaceae Juss.	Drimia maritima	Drimia maritima (L.) Stearn	217	SUBT	corpo; materie viscose & tenaci (solvere)	digestion of pasty matter (to promote)	INT	GA.PL
II_162	Asparagaceae Juss.	Drimia maritima	Drimia maritima (L.) Stearn	217	SUBT	petto; strettura di	dyspnoea	INT	RE.BD
II_162	Asparagaceae Juss.	Drimia maritima	Drimia maritima (L.) Stearn	217	SUBT	tosse vecchia	chronic cough	INT	RE.CO
II_162	Asparagaceae Juss.	Drimia maritima	Drimia maritima (L.) Stearn	217	SUBT	morso dalle vipere	viper bites	EXT	SK.AB
II_162	Asparagaceae Juss.	Drimia maritima	Drimia maritima (L.) Stearn	217	SUBT	bugance	chilblains on hands and feet	EXT	SK.IN
II_162	Asparagaceae Juss.	Drimia maritima	Drimia maritima (L.) Stearn	217	SUBT	calli	callus	EXT	SK.OT
II_162	Asparagaceae Juss.	Drimia maritima	Drimia maritima (L.) Stearn	217	SUBT	porri pendenti	pendant warts	EXT	SK.OT
II_162	Asparagaceae Juss.	Drimia maritima	Drimia maritima (L.) Stearn	217	SUBT	crepature dei piedi; contra alle	fissures of the feet; against	EXT	SK.WO
II_162	Asparagaceae Juss.	Drimia maritima	Drimia maritima (L.) Stearn	217	SUBT	hidropisie	dropsy	FUMI	UR.DI
II_162	Asparagaceae Juss.	Drimia maritima	Drimia maritima (L.) Stearn	217	SUBT	hidropisie	dropsy	INT	UR.DI
II_162	Asparagaceae Juss.	Drimia maritima	Drimia maritima (L.) Stearn	217	SUBT	orina (provocare)	diuretic	FUMI	UR.DI
II_162	Asparagaceae Juss.	Drimia maritima	Drimia maritima (L.) Stearn	217	SUBT	orina (provocare)	diuretic	INT	UR.DI
II_162	Asparagaceae Juss.	Drimia maritima	Drimia maritima (L.) Stearn	217	SUBT	incantamenti (prohibire)	enchantment (to ward off)	EXT	VAR
IV_185	Polypodiaceae J.Presl & C.Presl	Dryopteris filix-mas	Dryopteris filix-mas (L.) Schott	496	SUBT	vermini larghi del corpo (cacciare fuori)	large intestinal worms (to drive out)	INT	GA.PL
IV_185	Polypodiaceae J.Presl & C.Presl	Dryopteris filix-mas	Dryopteris filix-mas (L.) Schott	496	SUBT	ferite delle saette di canna	wounds caused by cane splinters	EXT	SK.WO
IV_185	Polypodiaceae J.Presl & C.Presl	Dryopteris filix-mas	Dryopteris filix-mas (L.) Schott	496	SUBT	milza; grandezza dell (sminuire)	spleen (to reduce)	INT	SPLE
III_124	Amaranthaceae Juss.	Dysphania botrys	Dysphania botrys (L.) Mosyakin & Clemants	563	HERB	asmatici	asthmatics	INT	RE.BD
IV_156	Cucurbitaceae Juss.	Ecballium elaterium	Ecballium elaterium (L.) A.Rich.	467	FRU	trabocco di fiele	Overflow of bile (jaundice)	EXT	GA.LI
IV_156	Cucurbitaceae Juss.	Ecballium elaterium	Ecballium elaterium (L.) A.Rich.	467	FRU	vomito (purgare per)	emetic	INT	GA.PL
IV_156	Cucurbitaceae Juss.	Ecballium elaterium	Ecballium elaterium (L.) A.Rich.	467	FRU	fanciullo nel ventre della madre (ammazzare)	embryo/foetus (to kill)	CLY	GY.AE
IV_156	Cucurbitaceae Juss.	Ecballium elaterium	Ecballium elaterium (L.) A.Rich.	467	FRU	mestrui (provocare)	menstruation (to induce)	CLY	GY.AE
IV_156	Cucurbitaceae Juss.	Ecballium elaterium	Ecballium elaterium (L.) A.Rich.	467	FRU	cholera e flemma (solvere)	yellow bile & phlegm (to resolve)	INT	HMM
IV_156	Cucurbitaceae Juss.	Ecballium elaterium	Ecballium elaterium (L.) A.Rich.	467	FRU	dolore vecchie del capo (levare)	chronic headache (to alleviate)	EXT	NS.PA
IV_156	Cucurbitaceae Juss.	Ecballium elaterium	Ecballium elaterium (L.) A.Rich.	467	FRU	petto; stretti di	dyspnoea	INT	RE.BD
IV_156	Cucurbitaceae Juss.	Ecballium elaterium	Ecballium elaterium (L.) A.Rich.	467	FRU	schirantia	angina (diphtheria)	EXT	RE.OT
IV_156	Cucurbitaceae Juss.	Ecballium elaterium	Ecballium elaterium (L.) A.Rich.	466	LEAF	orecchie; dolori delle	earache	EXT	NS.PA
IV_156	Cucurbitaceae Juss.	Ecballium elaterium	Ecballium elaterium (L.) A.Rich.	468	SUBT	stomaco (purgare)	stomach (to purge)	INT	GA.PL
IV_156	Cucurbitaceae Juss.	Ecballium elaterium	Ecballium elaterium (L.) A.Rich.	468	SUBT	podagre (risolvere)	gout (to dissolve)	EXT	GOUT
IV_156	Cucurbitaceae Juss.	Ecballium elaterium	Ecballium elaterium (L.) A.Rich.	468	SUBT	cholera e flemma (solvere)	yellow bile & phlegm (to resolve)	INT	HMM
IV_156	Cucurbitaceae Juss.	Ecballium elaterium	Ecballium elaterium (L.) A.Rich.	468	SUBT	dolore dei denti	toothache	EXT	NS.PA
IV_156	Cucurbitaceae Juss.	Ecballium elaterium	Ecballium elaterium (L.) A.Rich.	468	SUBT	sciatiche	sciatica	EXT	NS.SC
IV_156	Cucurbitaceae Juss.	Ecballium elaterium	Ecballium elaterium (L.) A.Rich.	468	SUBT	scabbia (mondificare)	scabies (to cleanse)	EXT	PARA
IV_156	Cucurbitaceae Juss.	Ecballium elaterium	Ecballium elaterium (L.) A.Rich.	468	SUBT	cicatrici nere (ritornare proprio coloro)	black scars	EXT	SK.CO
IV_156	Cucurbitaceae Juss.	Ecballium elaterium	Ecballium elaterium (L.) A.Rich.	468	SUBT	macole della faccia (spegnere)	facial blemishes (to remove)	EXT	SK.CO
IV_156	Cucurbitaceae Juss.	Ecballium elaterium	Ecballium elaterium (L.) A.Rich.	468	SUBT	vitiligini (mondificare)	vitiligo (to cleanse)	EXT	SK.CO
IV_156	Cucurbitaceae Juss.	Ecballium elaterium	Ecballium elaterium (L.) A.Rich.	468	SUBT	impetigini (mondificare)	impetigo (to cleanse)	EXT	SK.IF
IV_156	Cucurbitaceae Juss.	Ecballium elaterium	Ecballium elaterium (L.) A.Rich.	468	SUBT	postemette (rompere)	small abscesses (to break)	EXT	SK.IF
IV_156	Cucurbitaceae Juss.	Ecballium elaterium	Ecballium elaterium (L.) A.Rich.	468	SUBT	enfiagione vecchia (risolvere)	chronic swellings (to dissolve)	EXT	SK.OT
IV_156	Cucurbitaceae Juss.	Ecballium elaterium	Ecballium elaterium (L.) A.Rich.	468	SUBT	hidropici	dropsy	INT	UR.DI
IV_156	Cucurbitaceae Juss.	Ecballium elaterium	Ecballium elaterium (L.) A.Rich.	468	SUBT	hidropisia; tumore dell' (purgare)	oedematous swellings (to purge)	INT	UR.DI
III_051	Apiaceae Lindl.	Echinophora tenuifolia	Echinophora tenuifolia L.	265	FLOW	morso delle serpenti	snakebites	EXT	SK.AB
III_051	Apiaceae Lindl.	Echinophora tenuifolia	Echinophora tenuifolia L.	265	FLOW	tumori piccioli; contra i	small tumours	EXT	SK.OT
III_051	Apiaceae Lindl.	Echinophora tenuifolia	Echinophora tenuifolia L.	265	FLOW	ulcere maligne, che mangiano	creeping & malignant ulcers	EXT	SK.UL
III_051	Apiaceae Lindl.	Echinophora tenuifolia	Echinophora tenuifolia L.	266	SEED (Fruit)	morso delle serpenti	snakebites	EXT	SK.AB
III_051	Apiaceae Lindl.	Echinophora tenuifolia	Echinophora tenuifolia L.	266	SEED (Fruit)	tumori piccioli; contra i	small tumours	EXT	SK.OT
III_051	Apiaceae Lindl.	Echinophora tenuifolia	Echinophora tenuifolia L.	266	SEED (Fruit)	ulcere maligne, che mangiano	creeping & malignant ulcers	EXT	SK.UL
IV_026	Boraginaceae Juss.	Echium angustifolium	Echium angustifolium Mill.	387	LEAF	velenosi animali; morsi de	venomous animal bites	INT	ANTI
IV_026	Boraginaceae Juss.	Echium angustifolium	Echium angustifolium Mill.	387	LEAF	ammazzare animali velenosi	to kill venomous animals	EXT	POIS
IV_026	Boraginaceae Juss.	Echium angustifolium	Echium angustifolium Mill.	387	LEAF	morsi de velenosi animali	bites of venomous animals	EXT	SK.AB
IV_026	Boraginaceae Juss.	Echium angustifolium	Echium angustifolium Mill.	386	SUBT	velenosi animali; à morsi de	venomous animal bites	INT	ANTI
IV_026	Boraginaceae Juss.	Echium angustifolium	Echium angustifolium Mill.	386	SUBT	velenosi animali; morsi de	venomous animal bites	INT	ANTI
IV_026	Boraginaceae Juss.	Echium angustifolium	Echium angustifolium Mill.	386	SUBT	morsi de velenosi animali	bites of venomous animals	EXT	SK.AB
IV_029	Boraginaceae Juss.	Echium sp.	Echium italicum L.	611	SEED	serpenti; morso dei	snake bites	INT	ANTI
IV_029	Boraginaceae Juss.	Echium sp.	Echium italicum L.	611	SEED	latte nelle mammelle (generare)	lactation (to stimulate)	INT	GY.BR
IV_029	Boraginaceae Juss.	Echium sp.	Echium italicum L.	611	SEED	lombi; dolori de (mitigare)	lower back pain (to mitigate)	INT	MU.IN
IV_029	Boraginaceae Juss.	Echium sp.	Echium italicum L.	611	SEED	lombi; dolori dei (mitigare)	lower back pain (to mitigate)	INT	MU.IN
IV_029	Boraginaceae Juss.	Echium sp.	Echium italicum L.	611	SEED	non lascia mordere i serpenti	snakes (to repel)	INT	REPE
IV_029	Boraginaceae Juss.	Echium sp.	Echium italicum L.	569	SUBT	serpenti; morso dei	snake bites	INT	ANTI
IV_029	Boraginaceae Juss.	Echium sp.	Echium italicum L.	569	SUBT	latte nelle mammelle (generare)	lactation (to stimulate)	INT	GY.BR
IV_029	Boraginaceae Juss.	Echium sp.	Echium italicum L.	569	SUBT	lombi; dolori de (mitigare)	lower back pain (to mitigate)	INT	MU.IN
IV_029	Boraginaceae Juss.	Echium sp.	Echium italicum L.	569	SUBT	lombi; dolori de i (mitigare)	lower back pain (to mitigate)	INT	MU.IN
IV_029	Boraginaceae Juss.	Echium sp.	Echium italicum L.	569	SUBT	non lascia mordere i serpenti	snakes (to repel)	INT	REPE
I_005	Zingiberaceae Martinov	Elettaria cardamomum	Elettaria cardamomum (L.) Maton	3	FRU	scorpioni; punture de gli	scorpion stings	INT	ANTI
I_005	Zingiberaceae Martinov	Elettaria cardamomum	Elettaria cardamomum (L.) Maton	3	FRU	velenoso animale; morso dogni altro	venomous animal bites	INT	ANTI
I_005	Zingiberaceae Martinov	Elettaria cardamomum	Elettaria cardamomum (L.) Maton	3	FRU	corpo; dolori del	abdominal pain	INT	GA.FU
I_005	Zingiberaceae Martinov	Elettaria cardamomum	Elettaria cardamomum (L.) Maton	3	FRU	vermini larghi (cacciare)	large intestinal worms (to expel)	INT	GA.PL
I_005	Zingiberaceae Martinov	Elettaria cardamomum	Elettaria cardamomum (L.) Maton	3	FRU	fanciullino nel corpo della madre (ammazzare)	embryo/foetus (to kill)	FUMI	GY.AE
I_005	Zingiberaceae Martinov	Elettaria cardamomum	Elettaria cardamomum (L.) Maton	3	FRU	rotti e spasimati; à i	for the ruptured and the spastics	INT	MU.IN
I_005	Zingiberaceae Martinov	Elettaria cardamomum	Elettaria cardamomum (L.) Maton	3	FRU	sciatiche	sciatica	INT	NS.SC
I_005	Zingiberaceae Martinov	Elettaria cardamomum	Elettaria cardamomum (L.) Maton	3	FRU	mal caduco	epilepsy	INT	NS.VA
I_005	Zingiberaceae Martinov	Elettaria cardamomum	Elettaria cardamomum (L.) Maton	3	FRU	paralitici	paralyzed	INT	NS.VA
I_005	Zingiberaceae Martinov	Elettaria cardamomum	Elettaria cardamomum (L.) Maton	3	FRU	rogna (guarire)	scabies (to cure)	EXT	PARA
I_005	Zingiberaceae Martinov	Elettaria cardamomum	Elettaria cardamomum (L.) Maton	3	FRU	tosse	cough	INT	RE.CO
I_005	Zingiberaceae Martinov	Elettaria cardamomum	Elettaria cardamomum (L.) Maton	3	FRU	reni; pietre nelle (rompere)	renal calculi (to crush)	INT	UR.CA
I_005	Zingiberaceae Martinov	Elettaria cardamomum	Elettaria cardamomum (L.) Maton	3	FRU	reni	kidneys	INT	UR.OT
IV_053	Ephedraceae Dumort.	Ephedra sp.	Ephedra distachya L.	574	FRU	flussi stomachali	diarrhoea	INT	GA.DI
IV_053	Ephedraceae Dumort.	Ephedra sp.	Ephedra distachya L.	574	FRU	flussi muliebre; à i	vaginal discharge	INT	GY.VD
IV_048	Equisetaceae Michx.ex DC.	Equisetum sp.	Equisetum fluviatile L.	401	HERB	disenteria	dysentery	INT	GA.DI
IV_048	Equisetaceae Michx.ex DC.	Equisetum sp.	Equisetum fluviatile L.	401	HERB	budella; ferite delle (consolidare)	intestinal wounds (to close)	INT	GA.FU
IV_048	Equisetaceae Michx.ex DC.	Equisetum sp.	Equisetum fluviatile L.	401	HERB	rotture intestinali (consolidare)	intestinal ruptures	INT	GA.FU
IV_048	Equisetaceae Michx.ex DC.	Equisetum sp.	Equisetum fluviatile L.	401	HERB	rotti; à i	ruptured; the	INT	MU.IN
IV_048	Equisetaceae Michx.ex DC.	Equisetum sp.	Equisetum fluviatile L.	401	HERB	naso; sangue del (ristagnare)	epistaxis (to stop)	EXT	NOSE
IV_048	Equisetaceae Michx.ex DC.	Equisetum sp.	Equisetum fluviatile L.	401	HERB	asmatici	asthmatics	INT	RE.BD
IV_048	Equisetaceae Michx.ex DC.	Equisetum sp.	Equisetum fluviatile L.	401	HERB	tosse	cough	INT	RE.CO
IV_048	Equisetaceae Michx.ex DC.	Equisetum sp.	Equisetum fluviatile L.	401	HERB	ferite fresche (consolidare)	fresh wounds (to close)	EXT	SK.WO
IV_048	Equisetaceae Michx.ex DC.	Equisetum sp.	Equisetum fluviatile L.	401	HERB	orina (provocare)	diuretic	INT	UR.DI
IV_048	Equisetaceae Michx.ex DC.	Equisetum sp.	Equisetum fluviatile L.	401	HERB	vescica; ferite della (consolidare)	wounds of the bladder (to close)	INT	UR.OT
IV_049	Equisetaceae Michx.ex DC.	Equisetum sp.	Equisetum telmateia Ehrh.	402	HERB	disenteria	dysentery	INT	GA.DI
IV_049	Equisetaceae Michx.ex DC.	Equisetum sp.	Equisetum telmateia Ehrh.	402	HERB	budella; ferite delle (consolidare)	intestinal wounds (to close)	INT	GA.FU
IV_049	Equisetaceae Michx.ex DC.	Equisetum sp.	Equisetum telmateia Ehrh.	402	HERB	rotture intestinali (consolidare)	intestinal ruptures	INT	GA.FU
IV_049	Equisetaceae Michx.ex DC.	Equisetum sp.	Equisetum telmateia Ehrh.	402	HERB	rotti; à i	ruptured; the	INT	MU.IN
IV_049	Equisetaceae Michx.ex DC.	Equisetum sp.	Equisetum telmateia Ehrh.	402	HERB	naso; sangue del (ristagnare)	epistaxis (to stop)	EXT	NOSE
IV_049	Equisetaceae Michx.ex DC.	Equisetum sp.	Equisetum telmateia Ehrh.	402	HERB	asmatici	asthmatics	INT	RE.BD
IV_049	Equisetaceae Michx.ex DC.	Equisetum sp.	Equisetum telmateia Ehrh.	402	HERB	tosse	cough	INT	RE.CO
IV_049	Equisetaceae Michx.ex DC.	Equisetum sp.	Equisetum telmateia Ehrh.	402	HERB	ferite (saldare)	wounds (to close)	EXT	SK.WO
IV_049	Equisetaceae Michx.ex DC.	Equisetum sp.	Equisetum telmateia Ehrh.	402	HERB	ferite fresche (consolidare)	fresh wounds (to close)	EXT	SK.WO
IV_049	Equisetaceae Michx.ex DC.	Equisetum sp.	Equisetum telmateia Ehrh.	402	HERB	orina (provocare)	diuretic	INT	UR.DI
IV_049	Equisetaceae Michx.ex DC.	Equisetum sp.	Equisetum telmateia Ehrh.	402	HERB	vescica; ferite della (consolidare)	wounds of the bladder (to close)	INT	UR.OT
IV_049	Equisetaceae Michx.ex DC.	Equisetum sp.	Equisetum telmateia Ehrh.	612	SUBT	rotti; à i	ruptured; the	INT	MU.IN
IV_049	Equisetaceae Michx.ex DC.	Equisetum sp.	Equisetum telmateia Ehrh.	612	SUBT	asmatici	asthmatics	INT	RE.BD
IV_049	Equisetaceae Michx.ex DC.	Equisetum sp.	Equisetum telmateia Ehrh.	612	SUBT	tosse	cough	INT	RE.CO
I_098	Ericaceae Durande	Erica sp.	Erica scoparia L.	77	FLOW	morsure de i serpenti (medicare)	snakebites (to medicate)	EXT	SK.AB
I_098	Ericaceae Durande	Erica sp.	Erica scoparia L.	76	LEAF	morsure de i serpenti (medicare)	snakebites (to medicate)	EXT	SK.AB
II_129	Brassicaceae Burnett	Eruca vesicaria; Diplotaxis tenuifolia	Eruca vesicaria (L.) Cav.	191	LEAF	food (destare venere)	food (aphrodisiac)	INT	FOOD
II_129	Brassicaceae Burnett	Eruca vesicaria; Diplotaxis tenuifolia	Eruca vesicaria (L.) Cav.	191	LEAF	fare digerire	digestion (to promote)	INT	GA.FU
II_129	Brassicaceae Burnett	Eruca vesicaria; Diplotaxis tenuifolia	Eruca vesicaria (L.) Cav.	191	LEAF	venere (destare)	aphrodisiac	INT	LIBI
II_129	Brassicaceae Burnett	Eruca vesicaria; Diplotaxis tenuifolia	Eruca vesicaria (L.) Cav.	192	SEED	cibo (destare venere)	food (aphrodisiac)	INT	FOOD
II_129	Brassicaceae Burnett	Eruca vesicaria; Diplotaxis tenuifolia	Eruca vesicaria (L.) Cav.	192	SEED	condimento	condiment	INT	FOOD
II_129	Brassicaceae Burnett	Eruca vesicaria; Diplotaxis tenuifolia	Eruca vesicaria (L.) Cav.	192	SEED	venere (destare)	aphrodisiac	INT	LIBI
II_129	Brassicaceae Burnett	Eruca vesicaria; Diplotaxis tenuifolia	Eruca vesicaria (L.) Cav.	192	SEED	orina (provocare)	diuretic	INT	UR.DI
III_022	Apiaceae Lindl.	Eryngium maritimum	Eryngium maritimum L.	676	LEAF	cibo	food	INT	FOOD
III_022	Apiaceae Lindl.	Eryngium maritimum	Eryngium maritimum L.	247	SUBT	veleni bevuti; contra i	antidote	INT	ANTI
III_022	Apiaceae Lindl.	Eryngium maritimum	Eryngium maritimum L.	247	SUBT	velenosi animali; al morso de i	venomous animal bite	INT	ANTI
III_022	Apiaceae Lindl.	Eryngium maritimum	Eryngium maritimum L.	247	SUBT	corpo; dolori del (risolvere)	abdominal pain (to reduce)	INT	GA.FU
III_022	Apiaceae Lindl.	Eryngium maritimum	Eryngium maritimum L.	247	SUBT	ventosità (risolvere)	flatulence (to dissolve)	INT	GA.FU
III_022	Apiaceae Lindl.	Eryngium maritimum	Eryngium maritimum L.	247	SUBT	fegato; difetti del	liver defects	INT	GA.LI
III_022	Apiaceae Lindl.	Eryngium maritimum	Eryngium maritimum L.	247	SUBT	mestrui (provocare)	menstruation (to induce)	INT	GY.AE
III_022	Apiaceae Lindl.	Eryngium maritimum	Eryngium maritimum L.	247	SUBT	spasimo, che si chiama opisthotono	spasms [tetanus?]	INT	MU.IN
III_022	Apiaceae Lindl.	Eryngium maritimum	Eryngium maritimum L.	247	SUBT	mal caduco	epilepsy	INT	NS.VA
III_022	Apiaceae Lindl.	Eryngium maritimum	Eryngium maritimum L.	247	SUBT	tumori (risolvere)	tumours (to dissolve)	EXT	SK.OT
III_022	Apiaceae Lindl.	Eryngium maritimum	Eryngium maritimum L.	247	SUBT	orina (provocare)	diuretic	INT	UR.DI
IV_163	Euphorbiaceae Juss.	Euphorbia acanthothamnos	Euphorbia acanthothamnos Heldr. & Sart. ex Boiss.	663	HERB	purgare; per	to purge	INT	GA.PL
IV_163	Euphorbiaceae Juss.	Euphorbia acanthothamnos	Euphorbia acanthothamnos Heldr. & Sart. ex Boiss.	658	SUBT	cholera, flemma & humori acquosi (solvere)	yellow bile, phlegm & watery humours (to dissolve)	INT	HMM
IV_177	Euphorbiaceae Juss.	Euphorbia apios	Euphorbia apios L.	660	SUBT	corpo (purgare)	belly (to purge)	INT	GA.PL
III_090	Euphorbiaceae Juss.	Euphorbia balsamifera	Euphorbia balsamifera Aiton	560	EXUD	occhi; suffusioni de gli (risolvere)	cataract (to dissolve)	EXT	EYES
III_090	Euphorbiaceae Juss.	Euphorbia balsamifera	Euphorbia balsamifera Aiton	560	EXUD	ossa (fare squamare in un giorno)	bone (to make peel off)	EXT	MU.EX
III_090	Euphorbiaceae Juss.	Euphorbia balsamifera	Euphorbia balsamifera Aiton	560	EXUD	sciatiche	sciatica	INT	NS.SC
III_090	Euphorbiaceae Juss.	Euphorbia balsamifera	Euphorbia balsamifera Aiton	560	EXUD	morsure delle serpi	snakebites	EXT	SK.AB
IV_168	Euphorbiaceae Juss.	Euphorbia lathyris	Euphorbia lathyris L.	482	HERB	cholera, flemma & humori acquosi (purgare)	yellow bile, phlegm & watery humours (to purge)	INT	HMM
IV_168	Euphorbiaceae Juss.	Euphorbia lathyris	Euphorbia lathyris L.	481	SEED (Fruit)	corpo (purgare)	belly (to purge)	INT	GA.PL
IV_168	Euphorbiaceae Juss.	Euphorbia lathyris	Euphorbia lathyris L.	481	SEED (Fruit)	cholera, flemma & humori acquosi (purgare)	yellow bile, phlegm & watery humours (to purge)	INT	HMM
IV_166	Euphorbiaceae Juss.	Euphorbia sp.	Euphorbia paralias L.	478	LEAF	vomitare (fare)	vomiting (to induce)	INT	GA.PL
IV_166	Euphorbiaceae Juss.	Euphorbia sp.	Euphorbia paralias L.	478	LEAF	cholera & flemma (solvere)	yellow bile & phlegm (to resolve)	INT	HMM
IV_166	Euphorbiaceae Juss.	Euphorbia sp.	Euphorbia paralias L.	478	LEAF	dolore dei denti (cavare)	toothache (to remove)	EXT	NS.PA
IV_166	Euphorbiaceae Juss.	Euphorbia sp.	Euphorbia paralias L.	478	LEAF	ammazzare pesce	to kill fish	EXT	POIS
IV_166	Euphorbiaceae Juss.	Euphorbia sp.	Euphorbia paralias L.	478	LEAF	capelli (cavare fuori)	hair (to remove)	EXT	SK.CO
IV_166	Euphorbiaceae Juss.	Euphorbia sp.	Euphorbia paralias L.	478	LEAF	carboncelli	carbuncles	EXT	SK.IF
IV_166	Euphorbiaceae Juss.	Euphorbia sp.	Euphorbia paralias L.	478	LEAF	volatiche (sanare)	facial eruptions (to cure)	EXT	SK.IN
IV_166	Euphorbiaceae Juss.	Euphorbia sp.	Euphorbia paralias L.	478	LEAF	dita; pterigij delle	excrescences on fingernails	EXT	SK.OT
IV_166	Euphorbiaceae Juss.	Euphorbia sp.	Euphorbia paralias L.	478	LEAF	formiche (sanare)	warts (to cure)	EXT	SK.OT
IV_166	Euphorbiaceae Juss.	Euphorbia sp.	Euphorbia paralias L.	478	LEAF	porri (levare via)	warts (to remove)	EXT	SK.OT
IV_166	Euphorbiaceae Juss.	Euphorbia sp.	Euphorbia paralias L.	478	LEAF	thimi (levare via)	warts (to remove)	EXT	SK.OT
IV_166	Euphorbiaceae Juss.	Euphorbia sp.	Euphorbia paralias L.	478	LEAF	verruche (lavare via)	warts (to wash away)	EXT	SK.OT
IV_166	Euphorbiaceae Juss.	Euphorbia sp.	Euphorbia paralias L.	477	SEED (Fruit)	vomitare (fare)	vomiting (to induce)	INT	GA.PL
IV_166	Euphorbiaceae Juss.	Euphorbia sp.	Euphorbia paralias L.	477	SEED (Fruit)	cholera & flemma (solvere)	yellow bile & phlegm (to resolve)	INT	HMM
IV_166	Euphorbiaceae Juss.	Euphorbia sp.	Euphorbia paralias L.	477	SEED (Fruit)	dolore dei denti (cavare)	toothache (to remove)	EXT	NS.PA
IV_166	Euphorbiaceae Juss.	Euphorbia sp.	Euphorbia paralias L.	477	SEED (Fruit)	capelli (cavare fuori)	hair (to remove)	EXT	SK.CO
IV_166	Euphorbiaceae Juss.	Euphorbia sp.	Euphorbia paralias L.	477	SEED (Fruit)	cancrene	gangrene	EXT	SK.IF
IV_166	Euphorbiaceae Juss.	Euphorbia sp.	Euphorbia paralias L.	477	SEED (Fruit)	carboncelli	carbuncles	EXT	SK.IF
IV_166	Euphorbiaceae Juss.	Euphorbia sp.	Euphorbia paralias L.	477	SEED (Fruit)	volatiche (sanare)	facial eruptions (to cure)	EXT	SK.IN
IV_166	Euphorbiaceae Juss.	Euphorbia sp.	Euphorbia paralias L.	477	SEED (Fruit)	dita; pterigij delle	excrescences on fingernails	EXT	SK.OT
IV_166	Euphorbiaceae Juss.	Euphorbia sp.	Euphorbia paralias L.	477	SEED (Fruit)	formiche (sanare)	warts (to cure)	EXT	SK.OT
IV_166	Euphorbiaceae Juss.	Euphorbia sp.	Euphorbia paralias L.	477	SEED (Fruit)	porri (levare via)	warts (to remove)	EXT	SK.OT
IV_166	Euphorbiaceae Juss.	Euphorbia sp.	Euphorbia paralias L.	477	SEED (Fruit)	thimi (levare via)	warts (to remove)	EXT	SK.OT
IV_166	Euphorbiaceae Juss.	Euphorbia sp.	Euphorbia paralias L.	477	SEED (Fruit)	verruche (lavare via)	warts (to wash away)	EXT	SK.OT
IV_166	Euphorbiaceae Juss.	Euphorbia sp.	Euphorbia paralias L.	477	SEED (Fruit)	ulcere corrosive	creeping ulcers	EXT	SK.UL
IV_166	Euphorbiaceae Juss.	Euphorbia sp.	Euphorbia paralias L.	479	SUBT	purgare per disotto	to purge downwards	INT	GA.PL
IV_166	Euphorbiaceae Juss.	Euphorbia sp.	Euphorbia paralias L.	479	SUBT	dolore dei denti	toothache	EXT	NS.PA
IV_166	Euphorbiaceae Juss.	Euphorbia sp.	Euphorbia paralias L.	479	SUBT	ammazzare pesce	to kill fish	INT	POIS
IV_167	Euphorbiaceae Juss.	Euphorbia pithyusa	Euphorbia pithyusa L.	665	HERB	corpo (solvere per disotto)	belly (to purge downwards)	INT	GA.PL
IV_167	Euphorbiaceae Juss.	Euphorbia pithyusa	Euphorbia pithyusa L.	480	SUBT	corpo (solvere per disotto)	belly (to purge downwards)	INT	GA.PL
I_122b	Fagaceae Dumort.	Fagus sylvatica	Fagus sylvatica L.	613	BARK	flussi disenterici & stomachali	dysentery & diarrhoea	INT	GA.DI
I_122b	Fagaceae Dumort.	Fagus sylvatica	Fagus sylvatica L.	613	BARK	flussi delle donne (ristagnare)	vaginal discharge (to check)	CLY	GY.VD
I_122b	Fagaceae Dumort.	Fagus sylvatica	Fagus sylvatica L.	613	BARK	sputi del sangue	bloody cough	INT	RE.CO
I_122b	Fagaceae Dumort.	Fagus sylvatica	Fagus sylvatica L.	706	FRU	flussi disenterici & stomachali	dysentery & diarrhoea	INT	GA.DI
I_122b	Fagaceae Dumort.	Fagus sylvatica	Fagus sylvatica L.	706	FRU	flussi delle donne (ristagnare)	vaginal discharge (to check)	CLY	GY.VD
I_122b	Fagaceae Dumort.	Fagus sylvatica	Fagus sylvatica L.	706	FRU	sputi del sangue	bloody cough	INT	RE.CO
I_122b	Fagaceae Dumort.	Fagus sylvatica	Fagus sylvatica L.	706	FRU	durezze malefiche	malignant indurations	EXT	SK.OT
I_122b	Fagaceae Dumort.	Fagus sylvatica	Fagus sylvatica L.	98	LEAF	infiature; alle	swellings	EXT	SK.OT
I_122b	Fagaceae Dumort.	Fagus sylvatica	Fagus sylvatica L.	98	LEAF	membra; parti debili delle (fortificare)	weak limbs (to strengthen)	EXT	VAR
I_122b	Fagaceae Dumort.	Fagus sylvatica	Fagus sylvatica L.	99	SEED	animali velenosi; à i morsi de gli	venomous animal bites	INT	ANTI
I_122b	Fagaceae Dumort.	Fagus sylvatica	Fagus sylvatica L.	99	SEED	tossico; contra al	antidote	INT	ANTI
I_122b	Fagaceae Dumort.	Fagus sylvatica	Fagus sylvatica L.	99	SEED	infiammagioni (mitigare)	inflammations (to mitigate)	EXT	SK.IN
I_122b	Fagaceae Dumort.	Fagus sylvatica	Fagus sylvatica L.	99	SEED	ulcere malefiche	malignant ulcers	EXT	SK.UL
I_122b	Fagaceae Dumort.	Fagus sylvatica	Fagus sylvatica L.	99	SEED	orina (provocare)	diuretic	INT	UR.DI
III_085	Apiaceae Lindl.	Ferula communis	Ferula communis L.	304	HERB	morso delle vipere	viper bite	INT	ANTI
III_085	Apiaceae Lindl.	Ferula communis	Ferula communis L.	304	HERB	flussi stomachali	diarrhoea	INT	GA.DI
III_085	Apiaceae Lindl.	Ferula communis	Ferula communis L.	304	HERB	naso; sangue del (ristagnare)	epistaxis (to stop)	EXT	NOSE
III_085	Apiaceae Lindl.	Ferula communis	Ferula communis L.	304	HERB	sputi del sangue	bloody cough	INT	RE.CO
III_085	Apiaceae Lindl.	Ferula communis	Ferula communis L.	305	SEED (Fruit)	budella; dolori delle	intestinal pain	INT	GA.FU
III_091	Apiaceae Lindl.	Ferula sp.	Ferula gummosa Boiss.	308	EXUD	contra al tossico	antidote	INT	ANTI
III_091	Apiaceae Lindl.	Ferula sp.	Ferula gummosa Boiss.	308	EXUD	fare partorire le creature morte	to induce labour for stillbirth	INT	GY.AE
III_091	Apiaceae Lindl.	Ferula sp.	Ferula gummosa Boiss.	308	EXUD	madrice; strangolate dalla (risvegliare)	uterine contractions (to alleviate)	FUMI	GY.AE
III_091	Apiaceae Lindl.	Ferula sp.	Ferula gummosa Boiss.	308	EXUD	mestrui (provocare)	menstruation (to induce)	FUMI	GY.AE
III_091	Apiaceae Lindl.	Ferula sp.	Ferula gummosa Boiss.	308	EXUD	mestrui (provocare)	menstruation (to induce)	CLY	GY.AE
III_091	Apiaceae Lindl.	Ferula sp.	Ferula gummosa Boiss.	308	EXUD	parto (provocare)	delivery (to induce)	FUMI	GY.AE
III_091	Apiaceae Lindl.	Ferula sp.	Ferula gummosa Boiss.	308	EXUD	parto (provocare)	delivery (to induce)	CLY	GY.AE
III_091	Apiaceae Lindl.	Ferula sp.	Ferula gummosa Boiss.	308	EXUD	rotti e spasimati; à i	for the ruptured and the spastics	EXT	MU.EX
III_091	Apiaceae Lindl.	Ferula sp.	Ferula gummosa Boiss.	308	EXUD	costato; dolori del	side stitch	EXT	NS.PA
III_091	Apiaceae Lindl.	Ferula sp.	Ferula gummosa Boiss.	308	EXUD	dolore dei denti (mitigare)	toothache (to mitigate)	EXT	NS.PA
III_091	Apiaceae Lindl.	Ferula sp.	Ferula gummosa Boiss.	308	EXUD	mal caduco	epilepsy	FUMI	NS.VA
III_091	Apiaceae Lindl.	Ferula sp.	Ferula gummosa Boiss.	308	EXUD	vertigini; coloro che pascono le (svegliare)	vertigo	FUMI	NS.VA
III_091	Apiaceae Lindl.	Ferula sp.	Ferula gummosa Boiss.	308	EXUD	ammazzare serpenti	to kill snakes	EXT	POIS
III_091	Apiaceae Lindl.	Ferula sp.	Ferula gummosa Boiss.	308	EXUD	asmatici	asthmatics	EXT	RE.BD
III_091	Apiaceae Lindl.	Ferula sp.	Ferula gummosa Boiss.	308	EXUD	respirare; difetti del	breathing difficulties	EXT	RE.BD
III_091	Apiaceae Lindl.	Ferula sp.	Ferula gummosa Boiss.	308	EXUD	tosse vecchia	chronic cough	EXT	RE.CO
III_091	Apiaceae Lindl.	Ferula sp.	Ferula gummosa Boiss.	308	EXUD	animali velenosi (cacciare)	venomous animals (to repel)	FUMI	REPE
III_091	Apiaceae Lindl.	Ferula sp.	Ferula gummosa Boiss.	308	EXUD	morsi delle animali velenosi; contra	bites of venomous animals	EXT	SK.AB
III_091	Apiaceae Lindl.	Ferula sp.	Ferula gummosa Boiss.	308	EXUD	lentigini (spegnere)	freckles (to remove)	EXT	SK.CO
III_091	Apiaceae Lindl.	Ferula sp.	Ferula gummosa Boiss.	308	EXUD	foroncoli	boils	EXT	SK.IN
III_091	Apiaceae Lindl.	Ferula sp.	Ferula gummosa Boiss.	308	EXUD	orina ritenuta (provocare)	diuretic	INT	UR.DI
III_089	Apiaceae Lindl.	Ferula sp.	Ferula persica Willd.	677	EXUD	serpenti; morsi delle	snake bites	INT	ANTI
III_089	Apiaceae Lindl.	Ferula sp.	Ferula persica Willd.	677	EXUD	occhi; caligini de gli (levare via)	cataract (to remove)	EXT	EYES
III_089	Apiaceae Lindl.	Ferula sp.	Ferula persica Willd.	677	EXUD	occhi; cicatrici de gli (levare via)	scars in the eyes (to remove)	EXT	EYES
III_089	Apiaceae Lindl.	Ferula sp.	Ferula persica Willd.	677	EXUD	occhi; debolezze de gli (levare via)	visual impairments (to remove)	EXT	EYES
III_089	Apiaceae Lindl.	Ferula sp.	Ferula persica Willd.	677	EXUD	occhi; suffusioni de gli (levare via)	cataract (to remove)	EXT	EYES
III_089	Apiaceae Lindl.	Ferula sp.	Ferula persica Willd.	677	EXUD	febbri & freddo, che non sono continue	discontinuous fevers & shivering	INT	FEVE
III_089	Apiaceae Lindl.	Ferula sp.	Ferula persica Willd.	677	EXUD	creatura nella madrice (ammazzare)	embryo/foetus (to kill)	INT	GY.AE
III_089	Apiaceae Lindl.	Ferula sp.	Ferula persica Willd.	677	EXUD	madrice; strangolate dalla (risvegliare)	uterine contractions (to alleviate)	FUMI	GY.AE
III_089	Apiaceae Lindl.	Ferula sp.	Ferula persica Willd.	677	EXUD	mestrui (provocare)	menstruation (to induce)	INT	GY.AE
III_089	Apiaceae Lindl.	Ferula sp.	Ferula persica Willd.	677	EXUD	rotti e spasimati; à i	for the ruptured and the spastics	INT	MU.IN
III_089	Apiaceae Lindl.	Ferula sp.	Ferula persica Willd.	677	EXUD	spasimo, che si chiama opisthotono	spasms [tetanus?]	INT	MU.IN
III_089	Apiaceae Lindl.	Ferula sp.	Ferula persica Willd.	677	EXUD	costato; dolori del	side stitch	INT	NS.PA
III_089	Apiaceae Lindl.	Ferula sp.	Ferula persica Willd.	677	EXUD	mal caduco	epilepsy	INT	NS.VA
III_089	Apiaceae Lindl.	Ferula sp.	Ferula persica Willd.	677	EXUD	paralitici; à i	paralyzed	INT	NS.VA
III_089	Apiaceae Lindl.	Ferula sp.	Ferula persica Willd.	677	EXUD	polmone da i grossi humori (mondificare)	lungs from thick humours (to cleanse)	INT	RE.CO
III_089	Apiaceae Lindl.	Ferula sp.	Ferula persica Willd.	677	EXUD	tosse vecchia	chronic cough	INT	RE.CO
III_089	Apiaceae Lindl.	Ferula sp.	Ferula persica Willd.	677	EXUD	petto; difetti di	chest defects	INT	RE.OT
III_089	Apiaceae Lindl.	Ferula sp.	Ferula persica Willd.	677	EXUD	milza; difetti della	spleen defects	INT	SPLE
I_146	Moraceae Gaudich.	Ficus carica	Ficus carica L.	628	EXUD	latte (fare disfare & fare apprendere)	milk (to liquefy and solidify)	EXT	FOOD
I_146	Moraceae Gaudich.	Ficus carica	Ficus carica L.	628	EXUD	podagre	gout	EXT	GOUT
I_146	Moraceae Gaudich.	Ficus carica	Ficus carica L.	628	EXUD	mestrui (provocare)	menstruation (to induce)	CLY	GY.AE
I_146	Moraceae Gaudich.	Ficus carica	Ficus carica L.	628	EXUD	madrice; oppilationi della	uterine obstruction	INT	GY.UT
I_146	Moraceae Gaudich.	Ficus carica	Ficus carica L.	628	EXUD	dolore dei denti (guarire)	toothache (to cure)	EXT	NS.PA
I_146	Moraceae Gaudich.	Ficus carica	Ficus carica L.	628	EXUD	rogna	scabies	EXT	PARA
I_146	Moraceae Gaudich.	Ficus carica	Ficus carica L.	628	EXUD	scabbia (mondificare)	scabies (to cleanse)	EXT	PARA
I_146	Moraceae Gaudich.	Ficus carica	Ficus carica L.	628	EXUD	morso dei cani	dog bite	EXT	SK.AB
I_146	Moraceae Gaudich.	Ficus carica	Ficus carica L.	628	EXUD	morso di tutti gli animali velenosi	bite of any venomous animal	EXT	SK.AB
I_146	Moraceae Gaudich.	Ficus carica	Ficus carica L.	628	EXUD	punture de gli scorpioni	scorpion stings	EXT	SK.AB
I_146	Moraceae Gaudich.	Ficus carica	Ficus carica L.	628	EXUD	macole della faccia (sanare)	facial blemishes (to cure)	EXT	SK.CO
I_146	Moraceae Gaudich.	Ficus carica	Ficus carica L.	628	EXUD	vitiligini (sanare)	vitiligo (to cure)	EXT	SK.CO
I_146	Moraceae Gaudich.	Ficus carica	Ficus carica L.	628	EXUD	impetigini (sanare)	impetigo (to cure)	EXT	SK.IF
I_146	Moraceae Gaudich.	Ficus carica	Ficus carica L.	628	EXUD	scrofole (risolvere)	scrofulous swellings of glands (to dissolve)	EXT	SK.IF
I_146	Moraceae Gaudich.	Ficus carica	Ficus carica L.	628	EXUD	formiche, che sono simili à i porri	warts	EXT	SK.OT
I_146	Moraceae Gaudich.	Ficus carica	Ficus carica L.	628	EXUD	ulcere del capo, che menano	spreading ulcers of the head	EXT	SK.UL
I_146	Moraceae Gaudich.	Ficus carica	Ficus carica L.	134	FRU	orecchie; suffolare, che vi si sente nelle (acchetare)	tinnitus	EXT	EARS
I_146	Moraceae Gaudich.	Ficus carica	Ficus carica L.	134	FRU	corpo; dolori del	stomach-ache	CLY	GA.FU
I_146	Moraceae Gaudich.	Ficus carica	Ficus carica L.	134	FRU	corpo (solvere)	belly (to purge)	INT	GA.PL
I_146	Moraceae Gaudich.	Ficus carica	Ficus carica L.	134	FRU	luoghi delle donne; fomenti de	vaginal foments; for	EXT	GY.OT
I_146	Moraceae Gaudich.	Ficus carica	Ficus carica L.	134	FRU	fauci; infiammagioni delle	oral inflammations	EXT	MOUTH
I_146	Moraceae Gaudich.	Ficus carica	Ficus carica L.	134	FRU	ossa rotte (cavare)	bone fragments (to remove)	EXT	MU.EX
I_146	Moraceae Gaudich.	Ficus carica	Ficus carica L.	134	FRU	mal caduco	epilepsy	INT	NS.VA
I_146	Moraceae Gaudich.	Ficus carica	Ficus carica L.	134	FRU	petto; stretti di	dyspnoea	INT	RE.BD
I_146	Moraceae Gaudich.	Ficus carica	Ficus carica L.	134	FRU	canna del polmone	trachea	INT	RE.CO
I_146	Moraceae Gaudich.	Ficus carica	Ficus carica L.	134	FRU	gola	throat	INT	RE.CO
I_146	Moraceae Gaudich.	Ficus carica	Ficus carica L.	134	FRU	gola; infiammagioni della	sore throat	EXT	RE.CO
I_146	Moraceae Gaudich.	Ficus carica	Ficus carica L.	134	FRU	petto; vitij del (purgare)	chest from the sins (to purge)	INT	RE.CO
I_146	Moraceae Gaudich.	Ficus carica	Ficus carica L.	134	FRU	tosse vecchia	chronic cough	INT	RE.CO
I_146	Moraceae Gaudich.	Ficus carica	Ficus carica L.	134	FRU	polmone; difetti vecchi del	chronic lung problems	INT	RE.OT
I_146	Moraceae Gaudich.	Ficus carica	Ficus carica L.	134	FRU	morso del topo ragno	shrew bite	EXT	SK.AB
I_146	Moraceae Gaudich.	Ficus carica	Ficus carica L.	134	FRU	morso della scolopendra	bite of the scolopendra	EXT	SK.AB
I_146	Moraceae Gaudich.	Ficus carica	Ficus carica L.	134	FRU	pani (maturare)	abscesses (to ripen)	EXT	SK.IF
I_146	Moraceae Gaudich.	Ficus carica	Ficus carica L.	134	FRU	posteme dopo alle orecchie	abscesses behind the ear	EXT	SK.IF
I_146	Moraceae Gaudich.	Ficus carica	Ficus carica L.	134	FRU	scrofole (risolvere)	scrofulous swellings of glands (to dissolve)	EXT	SK.IF
I_146	Moraceae Gaudich.	Ficus carica	Ficus carica L.	134	FRU	bugance (guarire)	chilblains on hands and feet (to cure)	EXT	SK.IN
I_146	Moraceae Gaudich.	Ficus carica	Ficus carica L.	134	FRU	foroncoli	boils	EXT	SK.IN
I_146	Moraceae Gaudich.	Ficus carica	Ficus carica L.	134	FRU	foroncoli (risolvere)	boils (to dissolve)	EXT	SK.IN
I_146	Moraceae Gaudich.	Ficus carica	Ficus carica L.	134	FRU	orecchie; prurito delle	ear pruritus	EXT	SK.IN
I_146	Moraceae Gaudich.	Ficus carica	Ficus carica L.	134	FRU	dita; pterigij delle (purgare)	excrescences on fingernails (to purge)	EXT	SK.OT
I_146	Moraceae Gaudich.	Ficus carica	Ficus carica L.	134	FRU	durezze (mollificare)	indurations (to soften)	EXT	SK.OT
I_146	Moraceae Gaudich.	Ficus carica	Ficus carica L.	134	FRU	durezze (risolvere)	indurations (to dissolve)	EXT	SK.OT
I_146	Moraceae Gaudich.	Ficus carica	Ficus carica L.	134	FRU	formiche (fare cadere)	warts (to make fall off)	EXT	SK.OT
I_146	Moraceae Gaudich.	Ficus carica	Ficus carica L.	134	FRU	porri (fare cadere)	warts (to make fall off)	EXT	SK.OT
I_146	Moraceae Gaudich.	Ficus carica	Ficus carica L.	134	FRU	ulcere delle gambe, che sono incurabili & che malagevolmente si saldano (purgare)	ulcers of the legs that are difficult to heal and close (to purge)	EXT	SK.UL
I_146	Moraceae Gaudich.	Ficus carica	Ficus carica L.	134	FRU	hidropici	dropsy	INT	UR.DI
I_146	Moraceae Gaudich.	Ficus carica	Ficus carica L.	134	FRU	hidropici	dropsy	EXT	UR.DI
I_146	Moraceae Gaudich.	Ficus carica	Ficus carica L.	134	FRU	reni	kidneys	INT	UR.OT
I_146	Moraceae Gaudich.	Ficus carica	Ficus carica L.	134	FRU	vescica; alla	bladder	INT	UR.OT
I_146	Moraceae Gaudich.	Ficus carica	Ficus carica L.	133	LEAF	latte (diventare piu solutivo)	milk (to liquefy)	INT	FOOD
I_146	Moraceae Gaudich.	Ficus carica	Ficus carica L.	133	LEAF	morso dei cani	dog bite	EXT	SK.AB
I_146	Moraceae Gaudich.	Ficus carica	Ficus carica L.	133	LEAF	farfarella (curare)	dandruff (to cure)	EXT	SK.CO
I_146	Moraceae Gaudich.	Ficus carica	Ficus carica L.	133	LEAF	vitiligini bianche	white vitiligo	EXT	SK.CO
I_146	Moraceae Gaudich.	Ficus carica	Ficus carica L.	133	LEAF	epinittidi	pustules	EXT	SK.IF
I_146	Moraceae Gaudich.	Ficus carica	Ficus carica L.	133	LEAF	crescenze ficose & ruvidezze delle palpebre	fig-like excrescences on & roughness of eyelids	EXT	SK.OT
I_146	Moraceae Gaudich.	Ficus carica	Ficus carica L.	133	LEAF	ulcere del capo, che humigano (curare)	spreading ulcers of the head (to cure)	EXT	SK.UL
I_146	Moraceae Gaudich.	Ficus carica	Ficus carica L.	133	LEAF	ulcere favine	ulcers	EXT	SK.UL
I_145	Moraceae Gaudich.	Ficus sycomorus	Ficus sycomorus L.	532	FRU	utile per la copia dei continui frutti	famine food	INT	FOOD
III_076	Apiaceae Lindl.	Foeniculum vulgare	Foeniculum vulgare Mill.	292	LEAF	serpenti; morsi delle	snake bites	INT	ANTI
III_076	Apiaceae Lindl.	Foeniculum vulgare	Foeniculum vulgare Mill.	292	LEAF	occhi; difetti de gli	visual defects	EXT	EYES
III_076	Apiaceae Lindl.	Foeniculum vulgare	Foeniculum vulgare Mill.	292	LEAF	nausea nelle febbri (alleggerire)	nausea associated with fever (to soothe)	INT	GA.FU
III_076	Apiaceae Lindl.	Foeniculum vulgare	Foeniculum vulgare Mill.	292	LEAF	stomaco; ardori dello	heat in the stomach	INT	GA.FU
III_076	Apiaceae Lindl.	Foeniculum vulgare	Foeniculum vulgare Mill.	292	LEAF	mestrui (provocare)	menstruation (to induce)	INT	GY.AE
III_077	Apiaceae Lindl.	Foeniculum vulgare	Foeniculum vulgare Mill.	292	LEAF	parto; semine di (purgare)	embryo/foetus (to purge)	INT	GY.AE
III_077	Apiaceae Lindl.	Foeniculum vulgare	Foeniculum vulgare Mill.	292	LEAF	latte (generare abondantissimo)	lactation (to stimulate)	INT	GY.BR
III_076	Apiaceae Lindl.	Foeniculum vulgare	Foeniculum vulgare Mill.	292	LEAF	orina (provocare)	diuretic	INT	UR.DI
III_076	Apiaceae Lindl.	Foeniculum vulgare	Foeniculum vulgare Mill.	292	LEAF	reni; dolori delle	kidney pain	INT	UR.OT
III_076	Apiaceae Lindl.	Foeniculum vulgare	Foeniculum vulgare Mill.	292	LEAF	vescica; dolori della	bladder pain	INT	UR.OT
III_077	Apiaceae Lindl.	Foeniculum vulgare	Foeniculum vulgare Mill.	293	SEED (Fruit)	serpi velenose; morsi delle	venomous snake bites	INT	ANTI
III_076	Apiaceae Lindl.	Foeniculum vulgare	Foeniculum vulgare Mill.	293	SEED (Fruit)	occhi; difetti de gli	visual defects	EXT	EYES
III_077	Apiaceae Lindl.	Foeniculum vulgare	Foeniculum vulgare Mill.	293	SEED (Fruit)	corpo (ristagnare)	diarrhoea (to check)	INT	GA.DI
III_077	Apiaceae Lindl.	Foeniculum vulgare	Foeniculum vulgare Mill.	293	SEED (Fruit)	trabocco di fiele (purgare)	jaundice (to purge)	INT	GA.LI
III_076	Apiaceae Lindl.	Foeniculum vulgare	Foeniculum vulgare Mill.	293	SEED (Fruit)	latte (generare copioso)	lactation (to stimulate)	INT	GY.BR
III_077	Apiaceae Lindl.	Foeniculum vulgare	Foeniculum vulgare Mill.	293	SEED (Fruit)	pietre (rompere)	urinary calculi (to crush)	INT	UR.CA
III_077	Apiaceae Lindl.	Foeniculum vulgare	Foeniculum vulgare Mill.	294	SUBT	serpi velenose; morsi delle	venomous snake bites	INT	ANTI
III_076	Apiaceae Lindl.	Foeniculum vulgare	Foeniculum vulgare Mill.	294	SUBT	occhi; difetti de gli	visual defects	EXT	EYES
III_077	Apiaceae Lindl.	Foeniculum vulgare	Foeniculum vulgare Mill.	294	SUBT	corpo (ristagnare)	diarrhoea (to check)	INT	GA.DI
III_077	Apiaceae Lindl.	Foeniculum vulgare	Foeniculum vulgare Mill.	294	SUBT	trabocco di fiele (purgare)	jaundice (to purge)	INT	GA.LI
III_077	Apiaceae Lindl.	Foeniculum vulgare	Foeniculum vulgare Mill.	294	SUBT	mestrui (provocare)	menstruation (to induce)	CLY	GY.AE
III_076	Apiaceae Lindl.	Foeniculum vulgare	Foeniculum vulgare Mill.	294	SUBT	morso dei cani	dog bite	EXT	SK.AB
III_077	Apiaceae Lindl.	Foeniculum vulgare	Foeniculum vulgare Mill.	294	SUBT	pietre (rompere)	urinary calculi (to crush)	INT	UR.CA
III_077	Apiaceae Lindl.	Foeniculum vulgare	Foeniculum vulgare Mill.	294	SUBT	distillationi dell'orina; alle	to pass water (diuresis)	INT	UR.DI
I_089	Oleaceae Hoffmanns. & Link	Fraxinus sp.	Fraxinus ornus L.	66	LEAF	morso delle vipere	viper bite	INT	ANTI
IV_112	Papaveraceae Juss.	Fumaria officinalis	Fumaria officinalis L.	443	HERB	vista (chiarificare)	vision (to clear up)	INT	EYES
IV_112	Papaveraceae Juss.	Fumaria officinalis	Fumaria officinalis L.	443	HERB	palpebre; il nascer dei peli cavati dalle (prohibire)	roughness of eyelids (to prevent)	EXT	SK.CO
IV_112	Papaveraceae Juss.	Fumaria officinalis	Fumaria officinalis L.	443	HERB	cholera per orina (purgare coppiosamente)	yellow bile through urine (to draw down)	INT	UR.DI
III_098	Rubiaceae Juss.	Galium aparine	Galium aparine L.	311	HERB	morsi delle vipere	viper bites	INT	ANTI
III_098	Rubiaceae Juss.	Galium aparine	Galium aparine L.	311	HERB	morso dei phalangi (ragno)	spider bite	INT	ANTI
III_098	Rubiaceae Juss.	Galium aparine	Galium aparine L.	311	HERB	orecchie; dolori delle (medicare)	earache (to cure)	EXT	NS.PA
III_098	Rubiaceae Juss.	Galium aparine	Galium aparine L.	311	HERB	scrofole (risolvere)	scrofulous swellings of glands (to dissolve)	EXT	SK.IF
III_098	Rubiaceae Juss.	Galium aparine	Galium aparine L.	629	SEED	morsi delle vipere	viper bites	INT	ANTI
III_098	Rubiaceae Juss.	Galium aparine	Galium aparine L.	629	SEED	orecchie; dolori delle (medicare)	earache (to cure)	EXT	NS.PA
IV_098	Rubiaceae Juss.	Galium verum	Galium verum L.	436	FLOW	lassitudini	fatigue	EXT	NS.PS
IV_098	Rubiaceae Juss.	Galium verum	Galium verum L.	436	FLOW	cotture del fuoco	burns	EXT	SK.IN
IV_098	Rubiaceae Juss.	Galium verum	Galium verum L.	436	FLOW	flussi del sangue (ristagnare)	bleedings (to staunch)	EXT	SK.WO
IV_098	Rubiaceae Juss.	Galium verum	Galium verum L.	588	SUBT	coito; al (provocare)	sexual intercourse (to stimulate)	INT	LIBI
III_003	Gentianaceae Juss.	Gentiana lutea	Gentiana lutea L.	237	SUBT	serpenti; morsi de	snake bites	INT	ANTI
III_003	Gentianaceae Juss.	Gentiana lutea	Gentiana lutea L.	237	SUBT	occhi; infiammagioni de gli	eye inflammations	EXT	EYES
III_003	Gentianaceae Juss.	Gentiana lutea	Gentiana lutea L.	237	SUBT	stomaco; difetti dello	defects of the stomach	INT	GA.FU
III_003	Gentianaceae Juss.	Gentiana lutea	Gentiana lutea L.	237	SUBT	fegato; difetti del	liver defects	INT	GA.LI
III_003	Gentianaceae Juss.	Gentiana lutea	Gentiana lutea L.	237	SUBT	fare partorire	to induce labour	CLY	GY.AE
III_003	Gentianaceae Juss.	Gentiana lutea	Gentiana lutea L.	237	SUBT	rotti e spasimati; à i	for the ruptured and the spastics	INT	MU.IN
III_003	Gentianaceae Juss.	Gentiana lutea	Gentiana lutea L.	237	SUBT	dolori laterali; à i	lateral pain	INT	NS.PA
III_003	Gentianaceae Juss.	Gentiana lutea	Gentiana lutea L.	237	SUBT	vitiligini (sanare)	vitiligo (to cure)	EXT	SK.CO
III_003	Gentianaceae Juss.	Gentiana lutea	Gentiana lutea L.	237	SUBT	ulcere cavernose	cavernous ulcers	EXT	SK.UL
III_003	Gentianaceae Juss.	Gentiana lutea	Gentiana lutea L.	237	SUBT	ferite (consolidare)	wounds (to close)	EXT	SK.WO
IV_022	Iridaceae Juss.	Gladiolus italicus	Gladiolus italicus Mill.	381	SUBT	rotture intestinali de i fanciulli (guarire)	intestinal ruptures of children	INT	GA.FU
IV_022	Iridaceae Juss.	Gladiolus italicus	Gladiolus italicus Mill.	381	SUBT	sterile (fare diventare)	to make sterile	INT	GY.OT
IV_022	Iridaceae Juss.	Gladiolus italicus	Gladiolus italicus Mill.	381	SUBT	appetiti venerei (risvegliare)	aphrodisiac	INT	LIBI
IV_022	Iridaceae Juss.	Gladiolus italicus	Gladiolus italicus Mill.	381	SUBT	pani (risolvere)	abscesses (to soften)	EXT	SK.IF
IV_022	Iridaceae Juss.	Gladiolus italicus	Gladiolus italicus Mill.	381	SUBT	spine, bronconi & saette (tirare fuori)	spines & splinters (to pull out)	EXT	SK.WO
III_094	Papaveraceae Juss.	Glaucium corniculatum	Glaucium corniculatum (L.) Curtis	310	HERB	occhi; difetti de gli	visual defects	EXT	EYES
IV_068	Papaveraceae Juss.	Glaucium flavum	Glaucium flavum Crantz	416	FLOW	escara (levare via)	eschar (to remove)	EXT	SK.CO
IV_068	Papaveraceae Juss.	Glaucium flavum	Glaucium flavum Crantz	415	LEAF	escara (levare via)	eschar (to remove)	EXT	SK.CO
IV_068	Papaveraceae Juss.	Glaucium flavum	Glaucium flavum Crantz	414	SEED	corpo (purgare leggiermente)	belly (to purge slightly)	INT	GA.PL
IV_068	Papaveraceae Juss.	Glaucium flavum	Glaucium flavum Crantz	413	SUBT	fegato; difetti del	liver defects	INT	GA.LI
IV_068	Papaveraceae Juss.	Glaucium flavum	Glaucium flavum Crantz	413	SUBT	sciatiche	sciatica	INT	NS.SC
IV_068	Papaveraceae Juss.	Glaucium flavum	Glaucium flavum Crantz	413	SUBT	à coloro, che orinano materie grosse, aspre & come tele di ragni	passing of thick & harsh water	INT	UR.OT
IV_060	Asteraceae Bercht. & J.Presl	Glebionis coronaria	Glebionis coronaria (L.) Cass. ex Spach	348	FLOW	trabocco di fiele	Overflow of bile (jaundice)	INT	GA.LI
III_150	Asteraceae Bercht. & J.Presl	Glebionis coronaria	Glebionis coronaria (L.) Cass. ex Spach	348	FLOW	trabocco di fiele	Overflow of bile (jaundice)	INT	GA.LI
IV_060	Asteraceae Bercht. & J.Presl	Glebionis coronaria	Glebionis coronaria (L.) Cass. ex Spach	348	FLOW	posteme, che si chiamano adipine (risolvere)	abscesses called 'adipine' (to dissolve)	EXT	SK.IF
III_150	Asteraceae Bercht. & J.Presl	Glebionis coronaria	Glebionis coronaria (L.) Cass. ex Spach	348	FLOW	durezze (risolvere)	indurations (to dissolve)	EXT	SK.OT
III_150	Asteraceae Bercht. & J.Presl	Glebionis coronaria	Glebionis coronaria (L.) Cass. ex Spach	348	FLOW	tumori (risolvere)	tumours (to dissolve)	EXT	SK.OT
IV_060	Asteraceae Bercht. & J.Presl	Glebionis coronaria	Glebionis coronaria (L.) Cass. ex Spach	638	HERB	mangiare	food	INT	FOOD
IV_180	Plantaginaceae Juss.	Globularia alypum	Globularia alypum L.	489	SEED	interiora (ulcerare leggiermente)	intestine (to mildly ulcerate)	INT	GA.FU
IV_180	Plantaginaceae Juss.	Globularia alypum	Globularia alypum L.	489	SEED	melancholia (purgare)	black bile (to purge)	INT	HMM
III_005	Fabaceae Lindl.	Glycyrrhiza glabra	Glycyrrhiza glabra L.	239	SUBT	occhi; pterigi de gli	pterygia	EXT	EYES
III_005	Fabaceae Lindl.	Glycyrrhiza glabra	Glycyrrhiza glabra L.	239	SUBT	stomaco; infiammagioni dello	inflammations of the stomach	INT	GA.FU
III_005	Fabaceae Lindl.	Glycyrrhiza glabra	Glycyrrhiza glabra L.	239	SUBT	fegato	liver	EXT	GA.LI
III_005	Fabaceae Lindl.	Glycyrrhiza glabra	Glycyrrhiza glabra L.	239	SUBT	canna del polmone; asprezze della	trachea; roughness of	INT	RE.CO
III_005	Fabaceae Lindl.	Glycyrrhiza glabra	Glycyrrhiza glabra L.	239	SUBT	petto; infiammagioni del	inflammation of the chest	INT	RE.OT
III_005	Fabaceae Lindl.	Glycyrrhiza glabra	Glycyrrhiza glabra L.	239	SUBT	ferite (saldare)	wounds (to close)	EXT	SK.WO
III_005	Fabaceae Lindl.	Glycyrrhiza glabra	Glycyrrhiza glabra L.	239	SUBT	reni; dolori delle (sanare)	kidney pain (to cure)	INT	UR.OT
III_005	Fabaceae Lindl.	Glycyrrhiza glabra	Glycyrrhiza glabra L.	239	SUBT	vescica; rogna della (sanare)	scabies of the bladder (to cure)	INT	UR.OT
II_170	Araliaceae Juss.	Hedera helix	Hedera helix L.	552	FLOW	disenteria (guarire)	dysentery (to cure)	INT	GA.DI
II_170	Araliaceae Juss.	Hedera helix	Hedera helix L.	552	FLOW	cotture del fuoco	burns	EXT	SK.IN
II_170	Araliaceae Juss.	Hedera helix	Hedera helix L.	229	FRU	mestrui (provocare)	menstruation (to induce)	CLY	GY.AE
II_170	Araliaceae Juss.	Hedera helix	Hedera helix L.	229	FRU	sterile (diventare)	to make sterile	INT	GY.OT
II_170	Araliaceae Juss.	Hedera helix	Hedera helix L.	229	FRU	dolore dei denti	toothache	EXT	NS.PA
II_170	Araliaceae Juss.	Hedera helix	Hedera helix L.	229	FRU	neri i capelli (fare)	hair (to dye back)	EXT	SK.CO
II_170	Araliaceae Juss.	Hedera helix	Hedera helix L.	228	HERB	pidocchi (ammazzare)	lice (to kill)	EXT	PARA
II_170	Araliaceae Juss.	Hedera helix	Hedera helix L.	228	HERB	peli (fare cascare)	hair (to make fall off)	EXT	SK.CO
II_170	Araliaceae Juss.	Hedera helix	Hedera helix L.	227	LEAF	mestrui (provocare)	menstruation (to induce)	CLY	GY.AE
II_170	Araliaceae Juss.	Hedera helix	Hedera helix L.	227	LEAF	parto (provocare)	delivery (to induce)	CLY	GY.AE
II_170	Araliaceae Juss.	Hedera helix	Hedera helix L.	227	LEAF	dolori antichi di testa	chronic headache	INT	NS.PA
II_170	Araliaceae Juss.	Hedera helix	Hedera helix L.	227	LEAF	orecchie, che dogliono	earache	EXT	NS.PA
II_170	Araliaceae Juss.	Hedera helix	Hedera helix L.	227	LEAF	macole della faccia (spegnere)	facial blemishes (to remove)	EXT	SK.CO
II_170	Araliaceae Juss.	Hedera helix	Hedera helix L.	227	LEAF	orecchie, che menano	ear infection	EXT	SK.IF
II_170	Araliaceae Juss.	Hedera helix	Hedera helix L.	227	LEAF	cotture del fuoco	burns	EXT	SK.IN
II_170	Araliaceae Juss.	Hedera helix	Hedera helix L.	227	LEAF	ulcere maligne (medicare)	malignant ulcers (to medicate)	EXT	SK.UL
II_170	Araliaceae Juss.	Hedera helix	Hedera helix L.	227	LEAF	ulcere putride (sanare)	putrid ulcers (to cure)	EXT	SK.UL
II_170	Araliaceae Juss.	Hedera helix	Hedera helix L.	227	LEAF	milza (medicare)	spleen (to treat)	INT	SPLE
II_170	Araliaceae Juss.	Hedera helix	Hedera helix L.	636	SUBT	phalangi; al morso dei	venomous spider bite	INT	ANTI
IV_059	Asteraceae Bercht. & J.Presl	Helichrysum sp.	Helichrysum italicum (Roth) G.Don	577	FLOW	serpenti; morso delle	snake bites	INT	ANTI
IV_059	Asteraceae Bercht. & J.Presl	Helichrysum sp.	Helichrysum italicum (Roth) G.Don	577	FLOW	mestrui (provocare)	menstruation (to induce)	INT	GY.AE
IV_059	Asteraceae Bercht. & J.Presl	Helichrysum sp.	Helichrysum italicum (Roth) G.Don	577	FLOW	rotti; à i	ruptured; the	INT	MU.IN
IV_059	Asteraceae Bercht. & J.Presl	Helichrysum sp.	Helichrysum italicum (Roth) G.Don	577	FLOW	sciatiche	sciatica	INT	NS.SC
IV_059	Asteraceae Bercht. & J.Presl	Helichrysum sp.	Helichrysum italicum (Roth) G.Don	577	FLOW	catarro (prohibire)	catarrhs (to prevent)	INT	RE.CO
IV_059	Asteraceae Bercht. & J.Presl	Helichrysum sp.	Helichrysum italicum (Roth) G.Don	577	FLOW	tignuole; le vesti dalle (conservare)	moths (to repel)	EXT	REPE
IV_059	Asteraceae Bercht. & J.Presl	Helichrysum sp.	Helichrysum italicum (Roth) G.Don	577	FLOW	distillationi dell'orina; alle	to pass water (diuresis)	INT	UR.DI
IV_059	Asteraceae Bercht. & J.Presl	Helichrysum sp.	Helichrysum italicum (Roth) G.Don	577	FLOW	vescica; sangue appreso nella (risolvere)	clotted blood in the bladder (to dissolve)	INT	UR.OT
IV_193	Boraginaceae Juss.	Heliotropium sp.	Heliotropium europaeum L.	499	HERB	vermini tanto larghi del corpo (cacciare fuori)	very large intestinal worms (to drive out)	INT	GA.PL
IV_193	Boraginaceae Juss.	Heliotropium sp.	Heliotropium europaeum L.	499	HERB	vermini tanto larghi, quanto tondo del corpo (cacciare fuori)	very large and round intestinal worms (to drive out)	INT	GA.PL
IV_192	Boraginaceae Juss.	Heliotropium sp.	Heliotropium europaeum L.	499	HERB	podagre	gout	EXT	GOUT
IV_192	Boraginaceae Juss.	Heliotropium sp.	Heliotropium europaeum L.	499	HERB	fare partorire	to induce labour	CLY	GY.AE
IV_192	Boraginaceae Juss.	Heliotropium sp.	Heliotropium europaeum L.	499	HERB	mestrui (provocare)	menstruation (to induce)	EXT	GY.AE
IV_192	Boraginaceae Juss.	Heliotropium sp.	Heliotropium europaeum L.	499	HERB	concettione (impedire)	conception (to hinder)	EXT	GY.OT
IV_192	Boraginaceae Juss.	Heliotropium sp.	Heliotropium europaeum L.	499	HERB	cholera & flemma (purgare)	yellow bile & phlegm (to purge)	INT	HMM
IV_192	Boraginaceae Juss.	Heliotropium sp.	Heliotropium europaeum L.	499	HERB	giunture; dislogagioni delle	joint dislocations	EXT	MU.EX
IV_192	Boraginaceae Juss.	Heliotropium sp.	Heliotropium europaeum L.	499	HERB	punture de gli scorpioni	scorpion stings	EXT	SK.AB
IV_192	Boraginaceae Juss.	Heliotropium sp.	Heliotropium europaeum L.	499	HERB	ardori del capo de fanciulli; à gli	heatstroke (children)	EXT	SK.IN
IV_193	Boraginaceae Juss.	Heliotropium sp.	Heliotropium europaeum L.	499	HERB	verruche, che chiamano acrochordone (togliere via)	warts (to remove)	EXT	SK.OT
IV_192	Boraginaceae Juss.	Heliotropium sp.	Heliotropium europaeum L.	500	SEED	febbre terzana & quartana	tertian & quartan fever	INT	FEVE
IV_193	Boraginaceae Juss.	Heliotropium sp.	Heliotropium europaeum L.	500	SEED	vermini tanto larghi del corpo (cacciare fuori)	very large intestinal worms (to drive out)	INT	GA.PL
IV_193	Boraginaceae Juss.	Heliotropium sp.	Heliotropium europaeum L.	500	SEED	vermini tanto larghi, quanto tondo del corpo (cacciare fuori)	very large and round intestinal worms (to drive out)	INT	GA.PL
IV_192	Boraginaceae Juss.	Heliotropium sp.	Heliotropium europaeum L.	500	SEED	epinittidi (diseccare)	pustules (to dry out)	EXT	SK.IF
IV_192	Boraginaceae Juss.	Heliotropium sp.	Heliotropium europaeum L.	500	SEED	formiche verrucali & pendenti (diseccare)	pendant warts (to dry out)	EXT	SK.OT
IV_192	Boraginaceae Juss.	Heliotropium sp.	Heliotropium europaeum L.	500	SEED	thimi (diseccare)	warts (to dry out)	EXT	SK.OT
IV_193	Boraginaceae Juss.	Heliotropium sp.	Heliotropium europaeum L.	500	SEED	verruche, che chiamano acrochordone (togliere via)	warts (to remove)	EXT	SK.OT
IV_153	Ranunculaceae Juss.	Helleborus sp.	Helleborus lividus Aiton ex Curtis	719	HERB	orecchie; sordità nelle	deafness	EXT	EARS
IV_153	Ranunculaceae Juss.	Helleborus sp.	Helleborus lividus Aiton ex Curtis	719	HERB	purgare	to purge	INT	GA.PL
IV_153	Ranunculaceae Juss.	Helleborus sp.	Helleborus lividus Aiton ex Curtis	719	HERB	stomaco (purgare)	stomach (to purge)	INT	GA.PL
IV_153	Ranunculaceae Juss.	Helleborus sp.	Helleborus lividus Aiton ex Curtis	719	HERB	mestrui (provocare)	menstruation (to induce)	CLY	GY.AE
IV_153	Ranunculaceae Juss.	Helleborus sp.	Helleborus lividus Aiton ex Curtis	719	HERB	parto (ammazzare)	embryo/foetus (to kill)	CLY	GY.AE
IV_153	Ranunculaceae Juss.	Helleborus sp.	Helleborus lividus Aiton ex Curtis	719	HERB	cholera e flemma (solvere)	yellow bile & phlegm (to resolve)	INT	HMM
IV_153	Ranunculaceae Juss.	Helleborus sp.	Helleborus lividus Aiton ex Curtis	719	HERB	giunture; dolori di	joint pain	INT	MU.IN
IV_153	Ranunculaceae Juss.	Helleborus sp.	Helleborus lividus Aiton ex Curtis	719	HERB	dolore del capo (mitigare)	headache (to mitigate)	EXT	NS.PA
IV_153	Ranunculaceae Juss.	Helleborus sp.	Helleborus lividus Aiton ex Curtis	719	HERB	impazziscono; à coloro che	those that go crazy	INT	NS.PS
IV_153	Ranunculaceae Juss.	Helleborus sp.	Helleborus lividus Aiton ex Curtis	719	HERB	malinconici; à i	melancholics	INT	NS.PS
IV_153	Ranunculaceae Juss.	Helleborus sp.	Helleborus lividus Aiton ex Curtis	719	HERB	mal caduco	epilepsy	INT	NS.VA
IV_153	Ranunculaceae Juss.	Helleborus sp.	Helleborus lividus Aiton ex Curtis	719	HERB	paralitici; à i	paralyzed	INT	NS.VA
IV_153	Ranunculaceae Juss.	Helleborus sp.	Helleborus lividus Aiton ex Curtis	719	HERB	rogna (sanare)	scabies (to cure)	EXT	PARA
IV_153	Ranunculaceae Juss.	Helleborus sp.	Helleborus lividus Aiton ex Curtis	719	HERB	scabbia	scabies	EXT	PARA
IV_153	Ranunculaceae Juss.	Helleborus sp.	Helleborus lividus Aiton ex Curtis	719	HERB	vitiligini	vitiligo	EXT	SK.CO
IV_153	Ranunculaceae Juss.	Helleborus sp.	Helleborus lividus Aiton ex Curtis	719	HERB	fistole (purgare)	fistula (to purge)	EXT	SK.IF
IV_153	Ranunculaceae Juss.	Helleborus sp.	Helleborus lividus Aiton ex Curtis	719	HERB	volatiche	facial eruptions	EXT	SK.IN
IV_153	Ranunculaceae Juss.	Helleborus sp.	Helleborus lividus Aiton ex Curtis	719	HERB	hidropici	dropsy	EXT	UR.DI
III_070	Apiaceae Lindl.	Helosciadium nodiflorum	Helosciadium nodiflorum (L.) W.D.J.Koch	284	LEAF	veleni; contraria à i	poisons	INT	ANTI
III_070	Apiaceae Lindl.	Helosciadium nodiflorum	Helosciadium nodiflorum (L.) W.D.J.Koch	284	LEAF	occhi; infiammagioni de gli	eye inflammations	EXT	EYES
III_070	Apiaceae Lindl.	Helosciadium nodiflorum	Helosciadium nodiflorum (L.) W.D.J.Koch	284	LEAF	corpo (ristagnare)	diarrhoea (to check)	INT	GA.DI
III_070	Apiaceae Lindl.	Helosciadium nodiflorum	Helosciadium nodiflorum (L.) W.D.J.Koch	284	LEAF	stomaco; ardori dello (mitigare)	heat in the stomach (to mitigate)	INT	GA.FU
III_070	Apiaceae Lindl.	Helosciadium nodiflorum	Helosciadium nodiflorum (L.) W.D.J.Koch	284	LEAF	vomito (provocare)	emetic	INT	GA.PL
III_070	Apiaceae Lindl.	Helosciadium nodiflorum	Helosciadium nodiflorum (L.) W.D.J.Koch	284	LEAF	poppe; durezze delle causate dal latte appreso (risolvere)	breast engorgement (to dissolve)	INT	GY.BR
III_070	Apiaceae Lindl.	Helosciadium nodiflorum	Helosciadium nodiflorum (L.) W.D.J.Koch	284	LEAF	fare orinare	diuretic	INT	UR.DI
III_070	Apiaceae Lindl.	Helosciadium nodiflorum	Helosciadium nodiflorum (L.) W.D.J.Koch	691	SEED (Fruit)	spuma dell'argento; à coloro che havessero bevuta la	antidote for silver foam	INT	ANTI
III_070	Apiaceae Lindl.	Helosciadium nodiflorum	Helosciadium nodiflorum (L.) W.D.J.Koch	691	SEED (Fruit)	theriache	theriac	INT	ANTI
III_070	Apiaceae Lindl.	Helosciadium nodiflorum	Helosciadium nodiflorum (L.) W.D.J.Koch	691	SEED (Fruit)	veleni delle serpi	snake venoms	INT	ANTI
III_070	Apiaceae Lindl.	Helosciadium nodiflorum	Helosciadium nodiflorum (L.) W.D.J.Koch	691	SEED (Fruit)	dolori (mitigare)	pain (to mitigate)	INT	NS.PA
III_070	Apiaceae Lindl.	Helosciadium nodiflorum	Helosciadium nodiflorum (L.) W.D.J.Koch	691	SEED (Fruit)	tosse	cough	INT	RE.CO
III_070	Apiaceae Lindl.	Helosciadium nodiflorum	Helosciadium nodiflorum (L.) W.D.J.Koch	691	SEED (Fruit)	orina (provocare)	diuretic	INT	UR.DI
III_070	Apiaceae Lindl.	Helosciadium nodiflorum	Helosciadium nodiflorum (L.) W.D.J.Koch	603	SUBT	veleni; contraria à i	poisons	INT	ANTI
III_070	Apiaceae Lindl.	Helosciadium nodiflorum	Helosciadium nodiflorum (L.) W.D.J.Koch	603	SUBT	corpo (ristagnare)	diarrhoea (to check)	INT	GA.DI
III_070	Apiaceae Lindl.	Helosciadium nodiflorum	Helosciadium nodiflorum (L.) W.D.J.Koch	603	SUBT	vomito (provocare)	emetic	INT	GA.PL
III_084	Apiaceae Lindl.	Heracleum sp.	Heracleum sphondylium L.	302	FLOW	orecchie; ulcere delle, che menano	spreading ulcers of ears	EXT	SK.UL
III_084	Apiaceae Lindl.	Heracleum sp.	Heracleum sphondylium L.	301	SEED (Fruit)	fegato; difetti del (medicare)	liver defects (to cure)	INT	GA.LI
III_084	Apiaceae Lindl.	Heracleum sp.	Heracleum sphondylium L.	301	SEED (Fruit)	trabocco di fiele	Overflow of bile (jaundice)	INT	GA.LI
III_084	Apiaceae Lindl.	Heracleum sp.	Heracleum sphondylium L.	301	SEED (Fruit)	madrice; alle prefocationi della	uterine conditions	INT	GY.UT
III_084	Apiaceae Lindl.	Heracleum sp.	Heracleum sphondylium L.	301	SEED (Fruit)	flemma; per di sotto (solvere)	phlegm (to draw downwards)	INT	HMM
III_084	Apiaceae Lindl.	Heracleum sp.	Heracleum sphondylium L.	301	SEED (Fruit)	dolori di testa	headache	EXT	NS.PA
III_084	Apiaceae Lindl.	Heracleum sp.	Heracleum sphondylium L.	301	SEED (Fruit)	lethargici (svegliare)	lethargic person (to wake up)	FUMI	NS.PS
III_084	Apiaceae Lindl.	Heracleum sp.	Heracleum sphondylium L.	301	SEED (Fruit)	phrenetici; à	frenzy	EXT	NS.PS
III_084	Apiaceae Lindl.	Heracleum sp.	Heracleum sphondylium L.	301	SEED (Fruit)	mal caduco	epilepsy	INT	NS.VA
III_084	Apiaceae Lindl.	Heracleum sp.	Heracleum sphondylium L.	301	SEED (Fruit)	asmatici	asthmatics	INT	RE.BD
III_084	Apiaceae Lindl.	Heracleum sp.	Heracleum sphondylium L.	301	SEED (Fruit)	ulcere corrosive (fermare)	creeping ulcers (to stop)	EXT	SK.UL
III_084	Apiaceae Lindl.	Heracleum sp.	Heracleum sphondylium L.	303	SUBT	fegato; difetti del	liver defects	INT	GA.LI
III_084	Apiaceae Lindl.	Heracleum sp.	Heracleum sphondylium L.	303	SUBT	trabocco di fiele	Overflow of bile (jaundice)	INT	GA.LI
III_084	Apiaceae Lindl.	Heracleum sp.	Heracleum sphondylium L.	303	SUBT	fistole; callosità delle labbra delle (levare via)	callosity of fistula openings (to remove)	EXT	SK.OT
IV_005	Plantaginaceae Juss.	Hippuris vulgaris	Hippuris vulgaris L.	369	HERB	serpenti; morso dei	snake bites	INT	ANTI
IV_005	Plantaginaceae Juss.	Hippuris vulgaris	Hippuris vulgaris L.	369	HERB	febbri, che non sono continue	discontinuous fevers	INT	FEVE
IV_005	Plantaginaceae Juss.	Hippuris vulgaris	Hippuris vulgaris L.	369	HERB	flussi del corpo (ristagnare)	diarrhoea (to stop)	INT	GA.DI
IV_005	Plantaginaceae Juss.	Hippuris vulgaris	Hippuris vulgaris L.	369	HERB	stomaco; ardori dello	heat in the stomach	EXT	GA.FU
IV_005	Plantaginaceae Juss.	Hippuris vulgaris	Hippuris vulgaris L.	369	HERB	donne; flussi delle (ristagnare)	vaginal discharge (to check)	CLY	GY.VD
IV_005	Plantaginaceae Juss.	Hippuris vulgaris	Hippuris vulgaris L.	369	HERB	cholerici; à i	for the choleric person	INT	HMM
IV_005	Plantaginaceae Juss.	Hippuris vulgaris	Hippuris vulgaris L.	369	HERB	orecchie, che dogliono	earache	EXT	NS.PA
IV_005	Plantaginaceae Juss.	Hippuris vulgaris	Hippuris vulgaris L.	369	HERB	sputi del sangue	bloody cough	EXT	RE.CO
IV_005	Plantaginaceae Juss.	Hippuris vulgaris	Hippuris vulgaris L.	369	HERB	sputi del sangue (ristagnare)	bloody cough (to staunch)	INT	RE.CO
IV_005	Plantaginaceae Juss.	Hippuris vulgaris	Hippuris vulgaris L.	369	HERB	fuoco sacro; al	erysipelas	EXT	SK.IF
IV_005	Plantaginaceae Juss.	Hippuris vulgaris	Hippuris vulgaris L.	369	HERB	orecchie, che menano	ear infection	EXT	SK.IF
IV_005	Plantaginaceae Juss.	Hippuris vulgaris	Hippuris vulgaris L.	369	HERB	posteme; alle	abscesses	EXT	SK.IF
IV_005	Plantaginaceae Juss.	Hippuris vulgaris	Hippuris vulgaris L.	369	HERB	infiammagioni	inflammations	EXT	SK.IN
IV_005	Plantaginaceae Juss.	Hippuris vulgaris	Hippuris vulgaris L.	369	HERB	membra virili; ulcere della	male genital ulcers	EXT	SK.UL
IV_005	Plantaginaceae Juss.	Hippuris vulgaris	Hippuris vulgaris L.	369	HERB	ulcere corrosive	creeping ulcers	EXT	SK.UL
IV_005	Plantaginaceae Juss.	Hippuris vulgaris	Hippuris vulgaris L.	369	HERB	ferite fresche	fresh wounds	EXT	SK.WO
IV_005	Plantaginaceae Juss.	Hippuris vulgaris	Hippuris vulgaris L.	369	HERB	distillationi dell'orina; alle	to pass water (diuresis)	INT	UR.DI
II_107	Brassicaceae Burnett	Hirschfeldia incana	Hirschfeldia incana (L.) Lagr.-Foss.	160	HERB	nutritiva	food	INT	FOOD
II_107	Brassicaceae Burnett	Hirschfeldia incana	Hirschfeldia incana (L.) Lagr.-Foss.	160	HERB	stomaco; utile allo	stomach; good for the	INT	GA.FU
II_078	Poaceae Barnhart	Hordeum vulgare	Hordeum vulgare L.	140	SEED (Fruit)	nutrire	food	INT	FOOD
II_078	Poaceae Barnhart	Hordeum vulgare	Hordeum vulgare L.	140	SEED (Fruit)	corpo (ristagnare)	diarrhoea (to check)	INT	GA.DI
II_078	Poaceae Barnhart	Hordeum vulgare	Hordeum vulgare L.	140	SEED (Fruit)	flussi del corpo (ristagnare)	diarrhoea (to stop)	INT	GA.DI
II_078	Poaceae Barnhart	Hordeum vulgare	Hordeum vulgare L.	140	SEED (Fruit)	budella; ventosità delle	flatulence	EXT	GA.FU
II_078	Poaceae Barnhart	Hordeum vulgare	Hordeum vulgare L.	140	SEED (Fruit)	podagre; infiammagioni delle	gout inflammation	INT	GOUT
II_078	Poaceae Barnhart	Hordeum vulgare	Hordeum vulgare L.	140	SEED (Fruit)	latte (provocare)	lactation (to stimulate)	INT	GY.BR
II_078	Poaceae Barnhart	Hordeum vulgare	Hordeum vulgare L.	140	SEED (Fruit)	fauci; all'asprezza delle	hoarse throat	INT	MOUTH
II_078	Poaceae Barnhart	Hordeum vulgare	Hordeum vulgare L.	140	SEED (Fruit)	fauci; asprezze & ulcere delle	hoarse throat and ulcers of the throat	INT	MOUTH
II_078	Poaceae Barnhart	Hordeum vulgare	Hordeum vulgare L.	140	SEED (Fruit)	giunture; catarri, che scendono alle	fluxes down the joints	INT	MU.IN
II_078	Poaceae Barnhart	Hordeum vulgare	Hordeum vulgare L.	140	SEED (Fruit)	costato; dolori del (levare)	side stitch (to alleviate)	INT	NS.PA
II_078	Poaceae Barnhart	Hordeum vulgare	Hordeum vulgare L.	140	SEED (Fruit)	scabbia (guarire)	scabies (to cure)	EXT	PARA
II_078	Poaceae Barnhart	Hordeum vulgare	Hordeum vulgare L.	140	SEED (Fruit)	durezze (maturare)	indurations (to maturate)	EXT	SK.CO
II_078	Poaceae Barnhart	Hordeum vulgare	Hordeum vulgare L.	140	SEED (Fruit)	posteme (risolvere)	abscesses (to dissolve)	INT	SK.IF
II_078	Poaceae Barnhart	Hordeum vulgare	Hordeum vulgare L.	140	SEED (Fruit)	orina (provocare)	diuretic	INT	UR.DI
IV_065	Asparagaceae Juss.	Hyacinthus orientalis	Hyacinthus orientalis L.	406	SUBT	pettinecchio dei fanciulli (non vi lasciare nascere i peli)	pubis of children (to prevent maturation)	EXT	ANDR
IV_065	Asparagaceae Juss.	Hyacinthus orientalis	Hyacinthus orientalis L.	406	SUBT	phalangi; à i morsi dei	venomous spider bites	INT	ANTI
IV_065	Asparagaceae Juss.	Hyacinthus orientalis	Hyacinthus orientalis L.	406	SUBT	corpo (ristagnare)	diarrhoea (to check)	INT	GA.DI
IV_065	Asparagaceae Juss.	Hyacinthus orientalis	Hyacinthus orientalis L.	406	SUBT	orina (provocare)	diuretic	INT	UR.DI
IV_071	Solanaceae Juss.	Hyoscyamus sp.	Hyoscyamus albus L.	24	HERB	febbri, le quali chiamano epiale (sanare)	fevers (to cure)	INT	FEVE
IV_071	Solanaceae Juss.	Hyoscyamus sp.	Hyoscyamus albus L.	24	HERB	budello che si chiama colon; per l'ulcere di quel	intestinal ulcers	CLY	GA.FU
IV_071	Solanaceae Juss.	Hyoscyamus sp.	Hyoscyamus albus L.	24	HERB	luoghi secreti delle donne; alle difetti de i	vaginal/uterine defects	CLY	GY.UT
IV_071	Solanaceae Juss.	Hyoscyamus sp.	Hyoscyamus albus L.	24	HERB	dolori (levare)	pain (to alleviate)	INT	NS.PA
IV_071	Solanaceae Juss.	Hyoscyamus sp.	Hyoscyamus albus L.	24	HERB	dolori (mitigare)	pain (to mitigate)	EXT	NS.PA
IV_071	Solanaceae Juss.	Hyoscyamus sp.	Hyoscyamus albus L.	24	HERB	dolori; ogni sorte (mitigare)	pain; any type of (to mitigate)	EXT	NS.PA
IV_071	Solanaceae Juss.	Hyoscyamus sp.	Hyoscyamus albus L.	24	HERB	orecchie; dolori delle	earache	INT	NS.PA
IV_071	Solanaceae Juss.	Hyoscyamus sp.	Hyoscyamus albus L.	24	HERB	fare dormire	soporific	INT	NS.PS
IV_071	Solanaceae Juss.	Hyoscyamus sp.	Hyoscyamus albus L.	24	HERB	catarri calidi e acuti; à i	hot & acute catarrhs	INT	RE.CO
IV_071	Solanaceae Juss.	Hyoscyamus sp.	Hyoscyamus albus L.	24	HERB	infiammagioni dei piedi	inflammations of the feet	EXT	SK.IN
IV_071	Solanaceae Juss.	Hyoscyamus sp.	Hyoscyamus albus L.	23	SEED	occhi; dolori de gli	eye pain	EXT	EYES
IV_071	Solanaceae Juss.	Hyoscyamus sp.	Hyoscyamus albus L.	23	SEED	occhi; flussi de gli	fluxes of the eyes	EXT	EYES
IV_071	Solanaceae Juss.	Hyoscyamus sp.	Hyoscyamus albus L.	23	SEED	occhi; infiammagioni de gli	eye inflammations	EXT	EYES
IV_071	Solanaceae Juss.	Hyoscyamus sp.	Hyoscyamus albus L.	23	SEED	podagre	gout	INT	GOUT
IV_071	Solanaceae Juss.	Hyoscyamus sp.	Hyoscyamus albus L.	23	SEED	mammelle, che s'enfiano dopo al parto; alle	postpartum swelling of breasts	EXT	GY.BR
IV_071	Solanaceae Juss.	Hyoscyamus sp.	Hyoscyamus albus L.	23	SEED	luoghi secreti delle donne; alle difetti de i	vaginal/uterine defects	CLY	GY.UT
IV_071	Solanaceae Juss.	Hyoscyamus sp.	Hyoscyamus albus L.	23	SEED	flusso de mestrui; per il	menstrual discharge	INT	GY.VD
IV_071	Solanaceae Juss.	Hyoscyamus sp.	Hyoscyamus albus L.	23	SEED	dolori (cavare)	pain (to alleviate)	EXT	NS.PA
IV_071	Solanaceae Juss.	Hyoscyamus sp.	Hyoscyamus albus L.	23	SEED	dolori (levare)	pain (to alleviate)	INT	NS.PA
IV_071	Solanaceae Juss.	Hyoscyamus sp.	Hyoscyamus albus L.	23	SEED	orecchie; dolori delle	earache	INT	NS.PA
IV_071	Solanaceae Juss.	Hyoscyamus sp.	Hyoscyamus albus L.	23	SEED	fare dormire	soporific	INT	NS.PS
IV_071	Solanaceae Juss.	Hyoscyamus sp.	Hyoscyamus albus L.	23	SEED	catarri	catarrhs	INT	RE.CO
IV_071	Solanaceae Juss.	Hyoscyamus sp.	Hyoscyamus albus L.	23	SEED	catarri calidi e acuti; à i	hot & acute catarrhs	INT	RE.CO
IV_071	Solanaceae Juss.	Hyoscyamus sp.	Hyoscyamus albus L.	23	SEED	tosse	cough	INT	RE.CO
IV_071	Solanaceae Juss.	Hyoscyamus sp.	Hyoscyamus albus L.	23	SEED	testicoli; infiammagione de	scrotal inflammation	EXT	SK.IN
IV_071	Solanaceae Juss.	Hyoscyamus sp.	Hyoscyamus albus L.	23	SEED	flussi del sangue	bleedings	INT	VAR
IV_071	Solanaceae Juss.	Hyoscyamus sp.	Hyoscyamus albus L.	25	SUBT	dolore dei denti	toothache	EXT	NS.PA
IV_070	Papaveraceae Juss.	Hypecoum procumbens	Hypecoum procumbens L.	417	HERB	orecchie; difetti dell'	ear defects	EXT	EARS
IV_070	Papaveraceae Juss.	Hypecoum procumbens	Hypecoum procumbens L.	417	HERB	occhi; difetti de gli	visual defects	EXT	EYES
IV_070	Papaveraceae Juss.	Hypecoum procumbens	Hypecoum procumbens L.	417	HERB	occhi; infiammagioni de gli	eye inflammations	EXT	EYES
IV_070	Papaveraceae Juss.	Hypecoum procumbens	Hypecoum procumbens L.	417	HERB	occhi; medicine de gli	eye medicine	EXT	EYES
IV_070	Papaveraceae Juss.	Hypecoum procumbens	Hypecoum procumbens L.	417	HERB	flussi stomachali	diarrhoea	INT	GA.DI
IV_070	Papaveraceae Juss.	Hypecoum procumbens	Hypecoum procumbens L.	417	HERB	podagre	gout	EXT	GOUT
IV_070	Papaveraceae Juss.	Hypecoum procumbens	Hypecoum procumbens L.	417	HERB	dolore del capo (mitigare)	headache (to mitigate)	EXT	NS.PA
IV_070	Papaveraceae Juss.	Hypecoum procumbens	Hypecoum procumbens L.	417	HERB	dolori (mitigare)	pain (to mitigate)	INT	NS.PA
IV_070	Papaveraceae Juss.	Hypecoum procumbens	Hypecoum procumbens L.	417	HERB	orecchie; dolori delle	earache	EXT	NS.PA
IV_070	Papaveraceae Juss.	Hypecoum procumbens	Hypecoum procumbens L.	417	HERB	fare dormire	soporific	INT	NS.PS
IV_070	Papaveraceae Juss.	Hypecoum procumbens	Hypecoum procumbens L.	417	HERB	sonno (provocare)	soporific	CLY	NS.PS
IV_070	Papaveraceae Juss.	Hypecoum procumbens	Hypecoum procumbens L.	417	HERB	tosse	cough	INT	RE.CO
IV_070	Papaveraceae Juss.	Hypecoum procumbens	Hypecoum procumbens L.	417	HERB	fuoco sacro; al	erysipelas	EXT	SK.IF
IV_070	Papaveraceae Juss.	Hypecoum procumbens	Hypecoum procumbens L.	417	HERB	ferite	wounds	EXT	SK.WO
III_167	Hypericaceae Juss.	Hypericum sp.	Hypericum perfoliatum L.	683	HERB	cotture del fuoco (medicare)	burns (to medicate)	EXT	SK.IN
III_167	Hypericaceae Juss.	Hypericum sp.	Hypericum perfoliatum L.	683	HERB	sangue (ristagnare)	bleedings (to staunch)	EXT	SK.WO
III_167	Hypericaceae Juss.	Hypericum sp.	Hypericum perfoliatum L.	682	SEED	sciatiche (sanare)	sciatica (to cure)	INT	NS.SC
III_165	Hypericaceae Juss.	Hypericum sp.	Hypericum perfoliatum L.	682	SEED	febbre terzana & quartana (curare)	tertian & quartan fever (to cure)	INT	FEVE
III_165	Hypericaceae Juss.	Hypericum sp.	Hypericum perfoliatum L.	682	SEED	mestrui (cacciare fuori)	menstruation (to draw out)	CLY	GY.AE
III_167	Hypericaceae Juss.	Hypericum sp.	Hypericum perfoliatum L.	682	SEED	humori cholerici dal corpo (solvere)	yellow bile (to dissolve)	INT	HMM
III_165	Hypericaceae Juss.	Hypericum sp.	Hypericum perfoliatum L.	682	SEED	sciatiche (guarire)	sciatica (to cure)	INT	NS.SC
III_165	Hypericaceae Juss.	Hypericum sp.	Hypericum perfoliatum L.	682	SEED	cotture del fuoco	burns	EXT	SK.IN
III_165	Hypericaceae Juss.	Hypericum sp.	Hypericum perfoliatum L.	682	SEED	orina (provocare)	diuretic	INT	UR.DI
III_166	Hypericaceae Juss.	Hypericum sp.	Hypericum perforatum L.	365	SEED	sciatiche	sciatica	INT	NS.SC
III_166	Hypericaceae Juss.	Hypericum sp.	Hypericum perforatum L.	365	SEED	cotture del fuoco	burns	EXT	SK.IN
I_126b	Arecaceae Bercht. & J.Presl	Hyphaene thebaica	Hyphaene thebaica (L.) Mart.	641	FRU	continue febbri chiamate causoni (spegnere il calore nelle)	continuous fevers (to reduce heat of)	INT	FEVE
I_126b	Arecaceae Bercht. & J.Presl	Hyphaene thebaica	Hyphaene thebaica (L.) Mart.	641	FRU	cibo	food	INT	FOOD
I_126b	Arecaceae Bercht. & J.Presl	Hyphaene thebaica	Hyphaene thebaica (L.) Mart.	632	SEED	occhi; uve & pustule de gli	hordeolum	EXT	EYES
I_126b	Arecaceae Bercht. & J.Presl	Hyphaene thebaica	Hyphaene thebaica (L.) Mart.	632	SEED	ciglia	eyelashes	EXT	SK.CO
I_126b	Arecaceae Bercht. & J.Presl	Hyphaene thebaica	Hyphaene thebaica (L.) Mart.	632	SEED	peli delle palpebre; al cascare de i	falling out of eyelashes	EXT	SK.CO
I_126b	Arecaceae Bercht. & J.Presl	Hyphaene thebaica	Hyphaene thebaica (L.) Mart.	632	SEED	carne; crescenze della (sminuire)	excrescences (diminish)	EXT	SK.OT
I_126b	Arecaceae Bercht. & J.Presl	Hyphaene thebaica	Hyphaene thebaica (L.) Mart.	632	SEED	ulcere (consolidare & cicatrizare)	ulcers (to close & cicatrize)	EXT	SK.UL
III_027-1	Lamiaceae Martinov	Hyssopus officinalis	Hyssopus officinalis L.	250	HERB	orecchie; ventosità dell' (risolvere)	ears; windiness of the (to dissolve)	FUMI	EARS
III_027-1	Lamiaceae Martinov	Hyssopus officinalis	Hyssopus officinalis L.	250	HERB	corpo (fare muovere)	digestion (to promote)	INT	GA.PL
III_027-1	Lamiaceae Martinov	Hyssopus officinalis	Hyssopus officinalis L.	250	HERB	vermini del corpo (ammazzare)	intestinal worms (to kill)	INT	GA.PL
III_027-1	Lamiaceae Martinov	Hyssopus officinalis	Hyssopus officinalis L.	250	HERB	grossi humori (purgare per disotto)	thick humours (to purge downwards)	INT	HMM
III_027-1	Lamiaceae Martinov	Hyssopus officinalis	Hyssopus officinalis L.	250	HERB	bocca (lavare)	mouthwash	EXT	MOUTH
III_027-1	Lamiaceae Martinov	Hyssopus officinalis	Hyssopus officinalis L.	250	HERB	lividi, della percossa (svanire)	bruises (remove)	EXT	MU.EX
III_027-1	Lamiaceae Martinov	Hyssopus officinalis	Hyssopus officinalis L.	250	HERB	dolore dei denti (levare)	toothache (to alleviate)	EXT	NS.PA
III_027-1	Lamiaceae Martinov	Hyssopus officinalis	Hyssopus officinalis L.	250	HERB	asmatici	asthmatics	INT	RE.BD
III_027-1	Lamiaceae Martinov	Hyssopus officinalis	Hyssopus officinalis L.	250	HERB	petto; strettura di	dyspnoea	INT	RE.BD
III_027-1	Lamiaceae Martinov	Hyssopus officinalis	Hyssopus officinalis L.	250	HERB	catarri	catarrhs	INT	RE.CO
III_027-1	Lamiaceae Martinov	Hyssopus officinalis	Hyssopus officinalis L.	250	HERB	tosse vecchia	chronic cough	INT	RE.CO
III_027-1	Lamiaceae Martinov	Hyssopus officinalis	Hyssopus officinalis L.	250	HERB	polmone; difetti del	lung defects	INT	RE.OT
III_027-1	Lamiaceae Martinov	Hyssopus officinalis	Hyssopus officinalis L.	250	HERB	schirantia	angina (diphtheria)	EXT	RE.OT
III_027-1	Lamiaceae Martinov	Hyssopus officinalis	Hyssopus officinalis L.	250	HERB	infiammagioni	inflammations	EXT	SK.IN
III_027-1	Lamiaceae Martinov	Hyssopus officinalis	Hyssopus officinalis L.	250	HERB	milza; difetti della	spleen defects	EXT	SPLE
III_027-1	Lamiaceae Martinov	Hyssopus officinalis	Hyssopus officinalis L.	250	HERB	hidropici	dropsy	EXT	UR.DI
I_027	Asteraceae Bercht. & J.Presl	Inula helenium	Inula helenium L.	514	LEAF	sciatiche	sciatica	EXT	NS.SC
I_027	Asteraceae Bercht. & J.Presl	Inula helenium	Inula helenium L.	514	LEAF	sputi del sangue	bloody cough	INT	RE.CO
I_027	Asteraceae Bercht. & J.Presl	Inula helenium	Inula helenium L.	14	SUBT	serpenti; morsi dei	snake bites	INT	ANTI
I_027	Asteraceae Bercht. & J.Presl	Inula helenium	Inula helenium L.	14	SUBT	stomacho; utile allo	good for the stomach	INT	FOOD
I_027	Asteraceae Bercht. & J.Presl	Inula helenium	Inula helenium L.	14	SUBT	ventosità	flatulence	INT	GA.FU
I_027	Asteraceae Bercht. & J.Presl	Inula helenium	Inula helenium L.	14	SUBT	mestrui (provocare)	menstruation (to induce)	INT	GY.AE
I_027	Asteraceae Bercht. & J.Presl	Inula helenium	Inula helenium L.	14	SUBT	rotti e spasimati; à i	for the ruptured and the spastics	INT	MU.IN
I_027	Asteraceae Bercht. & J.Presl	Inula helenium	Inula helenium L.	14	SUBT	asmatici	asthmatics	INT	RE.BD
I_027	Asteraceae Bercht. & J.Presl	Inula helenium	Inula helenium L.	14	SUBT	tosse	cough	INT	RE.CO
I_027	Asteraceae Bercht. & J.Presl	Inula helenium	Inula helenium L.	14	SUBT	orina (provocare)	diuretic	INT	UR.DI
I_001	Iridaceae Juss.	Iris sp.	Iris × germanica L.	581	SUBT	sperma; flusso della	sperm	INT	ANDR
I_001	Iridaceae Juss.	Iris sp.	Iris × germanica L.	581	SUBT	animali velenosi; morsure de gli	venomous animal bites	INT	ANTI
I_001	Iridaceae Juss.	Iris sp.	Iris × germanica L.	581	SUBT	lagrime (provocare)	tears (to induce)	INT	EYES
I_001	Iridaceae Juss.	Iris sp.	Iris × germanica L.	581	SUBT	febbri; spasimati, freddo & tremori, che vengono nel principio delle	spasms, shivering & tremor at the beginning of fevers	INT	FEVE
I_001	Iridaceae Juss.	Iris sp.	Iris × germanica L.	581	SUBT	corpo; dolori del (medicare)	abdominal pain (to treat)	INT	GA.FU
I_001	Iridaceae Juss.	Iris sp.	Iris × germanica L.	581	SUBT	mestrui (provocare)	menstruation (to induce)	INT	GY.AE
I_001	Iridaceae Juss.	Iris sp.	Iris × germanica L.	581	SUBT	parto (provocare)	delivery (to induce)	CLY	GY.AE
I_001	Iridaceae Juss.	Iris sp.	Iris × germanica L.	581	SUBT	natura delle donne; durezze alla (mollificare)	uterine indurations (to soften)	CLY	GY.UT
I_001	Iridaceae Juss.	Iris sp.	Iris × germanica L.	581	SUBT	natura delle donne; oppilationi alla (aprire)	uterine obstruction (to open)	CLY	GY.UT
I_001	Iridaceae Juss.	Iris sp.	Iris × germanica L.	581	SUBT	ossa scoperte (ricoprire di carne)	exposed bones (to flesh up)	EXT	MU.EX
I_001	Iridaceae Juss.	Iris sp.	Iris × germanica L.	581	SUBT	dolore del capo	headache	EXT	NS.PA
I_001	Iridaceae Juss.	Iris sp.	Iris × germanica L.	581	SUBT	lassitudini	fatigue	EXT	NS.PS
I_001	Iridaceae Juss.	Iris sp.	Iris × germanica L.	581	SUBT	lassitudini	fatigue	CLY	NS.PS
I_001	Iridaceae Juss.	Iris sp.	Iris × germanica L.	581	SUBT	lassitudini	fatigue	INT	NS.PS
I_001	Iridaceae Juss.	Iris sp.	Iris × germanica L.	581	SUBT	sonno (provocare)	soporific	INT	NS.PS
I_001	Iridaceae Juss.	Iris sp.	Iris × germanica L.	581	SUBT	sciatiche	sciatica	CLY	NS.SC
I_001	Iridaceae Juss.	Iris sp.	Iris × germanica L.	581	SUBT	petto; humori del (estenuare)	expectoration (to promote)	INT	RE.CO
I_001	Iridaceae Juss.	Iris sp.	Iris × germanica L.	581	SUBT	tosse	cough	INT	RE.CO
I_001	Iridaceae Juss.	Iris sp.	Iris × germanica L.	581	SUBT	lentigini (spegnere)	freckles (to remove)	EXT	SK.CO
I_001	Iridaceae Juss.	Iris sp.	Iris × germanica L.	581	SUBT	scrofole (mollificare)	scrofulous swellings of glands (to soften)	EXT	SK.IF
I_001	Iridaceae Juss.	Iris sp.	Iris × germanica L.	581	SUBT	ulcere cavernose (incarnare)	cavernous ulcers (to restore flesh)	EXT	SK.UL
I_001	Iridaceae Juss.	Iris sp.	Iris × germanica L.	581	SUBT	ulcere; concavità delle (riempire)	concavities of ulcers (to fill)	EXT	SK.UL
I_001	Iridaceae Juss.	Iris sp.	Iris × germanica L.	581	SUBT	milza; difettosi di	spleen defects	INT	SPLE
IV_024	Iridaceae Juss.	Iris foetidissima	Iris foetidissima L.	702	SEED	milza (sminuire)	spleen (to reduce)	INT	SPLE
IV_024	Iridaceae Juss.	Iris foetidissima	Iris foetidissima L.	702	SEED	orina (provocare)	diuretic	INT	UR.DI
IV_024	Iridaceae Juss.	Iris foetidissima	Iris foetidissima L.	684	SUBT	flusso del corpo	abdominal fluxes	INT	GA.DI
IV_024	Iridaceae Juss.	Iris foetidissima	Iris foetidissima L.	684	SUBT	ossa; rotture dell'	bone fractures	EXT	MU.EX
IV_024	Iridaceae Juss.	Iris foetidissima	Iris foetidissima L.	684	SUBT	spasimo & rotture	spasms & ruptures	INT	MU.IN
IV_024	Iridaceae Juss.	Iris foetidissima	Iris foetidissima L.	684	SUBT	sciatiche	sciatica	INT	NS.SC
IV_024	Iridaceae Juss.	Iris foetidissima	Iris foetidissima L.	684	SUBT	infiammagioni (sanare)	inflammations (to cure)	EXT	SK.IN
IV_024	Iridaceae Juss.	Iris foetidissima	Iris foetidissima L.	684	SUBT	tumori (sanare)	tumours (to cure)	EXT	SK.OT
IV_024	Iridaceae Juss.	Iris foetidissima	Iris foetidissima L.	684	SUBT	bronconi & saette nel carne (cavare)	splinters (to pull out)	EXT	SK.WO
IV_024	Iridaceae Juss.	Iris foetidissima	Iris foetidissima L.	684	SUBT	ferite della testa	wounds of the head	EXT	SK.WO
IV_024	Iridaceae Juss.	Iris foetidissima	Iris foetidissima L.	684	SUBT	distillationi dell'orina; alle	to pass water (diuresis)	INT	UR.DI
II_175	Brassicaceae Burnett	Isatis tinctoria	Isatis tinctoria L.	234	LEAF	fuoco sacro (guarire)	erysipelas	EXT	SK.IF
II_175	Brassicaceae Burnett	Isatis tinctoria	Isatis tinctoria L.	234	LEAF	posteme (risolvere)	abscesses (to dissolve)	EXT	SK.IF
II_175	Brassicaceae Burnett	Isatis tinctoria	Isatis tinctoria L.	234	LEAF	ulcere che mangiano (guarire)	spreading ulcers (to cure)	EXT	SK.UL
II_175	Brassicaceae Burnett	Isatis tinctoria	Isatis tinctoria L.	234	LEAF	ulcere putride (guarire)	putrid ulcers (to cure)	EXT	SK.UL
II_175	Brassicaceae Burnett	Isatis tinctoria	Isatis tinctoria L.	234	LEAF	ulcere, che van serpendo (guarire)	spreading ulcers (to cure)	EXT	SK.UL
II_175	Brassicaceae Burnett	Isatis tinctoria	Isatis tinctoria L.	234	LEAF	ferite fresche (saldare)	fresh wounds (to close)	EXT	SK.WO
II_175	Brassicaceae Burnett	Isatis tinctoria	Isatis tinctoria L.	234	LEAF	flussi del sangue (ristagnare)	bleedings (to staunch)	EXT	SK.WO
II_176	Brassicaceae Burnett	Isatis tinctoria	Isatis tinctoria L.	234	LEAF	milza; difetti della	spleen defects	INT	SPLE
II_176	Brassicaceae Burnett	Isatis tinctoria	Isatis tinctoria L.	234	LEAF	milza; difetti della	spleen defects	EXT	SPLE
I_032c	Juglandaceae DC.ex Perleb	Juglans regia	Juglans regia L.	705	OIL	orecchie; suffoli delle	tinnitus	EXT	EARS
I_032c	Juglandaceae DC.ex Perleb	Juglans regia	Juglans regia L.	705	OIL	orecchie; suono delle	tinnitus	EXT	EARS
I_032c	Juglandaceae DC.ex Perleb	Juglans regia	Juglans regia L.	705	OIL	orecchie; dolori delle	earache	EXT	NS.PA
I_032c	Juglandaceae DC.ex Perleb	Juglans regia	Juglans regia L.	705	OIL	cicatrici nere	black scars	EXT	SK.CO
I_032c	Juglandaceae DC.ex Perleb	Juglans regia	Juglans regia L.	705	OIL	viso; le macchie del (levare)	spots on face (to remove)	EXT	SK.CO
I_032c	Juglandaceae DC.ex Perleb	Juglans regia	Juglans regia L.	705	OIL	ulcere del capo, che umigano	spreading ulcers of the head	EXT	SK.UL
I_142	Juglandaceae DC.ex Perleb	Juglans regia	Juglans regia L.	135	SEED	veleni mortiferi; à i	deadly poisons	INT	ANTI
I_142	Juglandaceae DC.ex Perleb	Juglans regia	Juglans regia L.	135	SEED	fistole agrimali (sanare)	lacrimal fistula (to cure)	EXT	EYES
I_142	Juglandaceae DC.ex Perleb	Juglans regia	Juglans regia L.	135	SEED	mangiare (malagevolmente da digerire)	food (difficult to digest)	INT	FOOD
I_142	Juglandaceae DC.ex Perleb	Juglans regia	Juglans regia L.	135	SEED	vermini larghi del corpo (cacciare via)	large intestinal worms (to drive out)	INT	GA.PL
I_142	Juglandaceae DC.ex Perleb	Juglans regia	Juglans regia L.	135	SEED	vomitare (fare)	vomiting (to induce)	INT	GA.PL
[truncated: 2,434 more rows]
