# Supplementary material for: Taste shaped the use of botanical drugs
Source: bioRxiv preprint, doi:10.1101/2023.07.18.549469, version 2 (2023-11-21)
Supplement: Supplementary Table 5 [file 549469_file10.xlsx]

## Sheet: SF5_HeatMap_Sig.Pars_Only
TASTE/FLAVOUR USE	Sour/Acidic (SOUR)	Smoky (SMOK)	Bitter (BITT)	Starchy (STAR)	Aromatic (AROM)	Astringent (ASTR)	Balsamic (BALS)	Burning/Hot (BURN)	Warming (WARM)	Sweet (SWEE)	Herby/Leafy (HERB)	Fruity (FRUI)	Woody (WOOD)	Musky (MUSK)	Nutty (NUTT)	Straw-like (STRW)	Stinging (STGI)	Stinky (STNK)	Fresh/cooling (FRES)	Salty (SALT)	Soapy (SOAP)	Mucilaginous (MUCI)	T	N	P	Negative	Positive
Andrology (ANDR)	0	-29.96	0	0	0	0	0	0	0	-0.58387	0	0	0	0	0	0	0	0	0	0	0	0	2	2		Smoky (SMOK); Sweet (SWEE);
Antidotes (ANTI)	-0.304538	0	0	0	0	0	0	0	0	0	0	-0.301572	0	0.360029	0.303608	0	0	0	0	0	0.291126	0	5	2	3	Sour/Acidic (SOUR); Fruity (FRUI);	Musky (MUSK); Nutty (NUTT); Soapy (SOAP);
Cardiac problems (CARD)	0	0	0.470873	0	0	0	0	0	0	0	0	0	0	0	0	0	0	0	0	0	0.568163	0	2		2		Bitter (BITT); Soapy (SOAP);
Ears (EARS)	0	0	0	0	0	0	0	0.494627	0	0.888375	0	0	0	0	0	0	0	0	0	0	0	0	2		2		Burning/Hot (BURN); Sweet (SWEE);
Eyes (EYES)	-0.380905	0	0	0	0	0	0	0.365942	0	0.338752	0	0	0	0	0	0	0	0	0	0	0	0	3	1	2	Sour/Acidic (SOUR);	Burning/Hot (BURN); Sweet (SWEE);
Fevers (inc. malaria) (FEVE)	-0.489638	0	0	0	0	-0.520421	0	0.392492	0	0	0	0	0	0	0	0	0	0	0	0	0	0	3	2	1	Sour/Acidic (SOUR); Astringent (ASTR);	Burning/Hot (BURN);
Food (FOOD)	0	0	-0.234847	0.354414	0	0	0	0	0	0	0	0	-0.589455	0	0.437141	0	-0.18659	0	0	0.382815	0	0	6	3	3	Bitter (BITT); Woody (WOOD); Stinging (STGI);	Starchy (STAR); Nutty (NUTT); Salty (SALT);
Gastric (diarrheal conditions) (GA.DI)	0	0	0	0.53961	0	0.20057	0	0	0	0	0	0	0.234606	0	0	0	0	0	0	0.351343	0	0	4		4		Starchy (STAR); Astringent (ASTR); Woody (WOOD); Salty (SALT);
Gastric (liver) (GA.LI)	0.330173	0	0.325664	0	0.283095	0	0	0	0	-0.26439	0	0	0	0	0	0	0	0	0	0	0	0	4	1	3	Sweet (SWEE);	Sour/Acidic (SOUR); Bitter (BITT); Aromatic (AROM);
Gastric function (GA.FU)	0	0	0	0	0	0	0	0	0	0.303243	0	0	-0.247978	0.236758	-0.345442	0	0	0	0	0.179809	0.254517	0	6	2	4	Woody (WOOD); Nutty (NUTT);	Sweet (SWEE); Musky (MUSK); Salty (SALT); Soapy (SOAP);
Gastric (purgatives and laxatives) (GA.PL)	0	0	0	0	0	0	0	0	0	0	-0.257453	0	0	0	0	0	0	0	0	0.324029	0	0	2	1	1	Herby/Leafy (HERB);	Salty (SALT);
Gout (GOUT)	0	0	0	0	0	0	0	0.41548	0	0	0	0	0	0	0	-0.702184	0	0	0	0	0	0	2	1	1	Straw-like (STRW);	Burning/Hot (BURN);
Gynaecology (abortion, menses) (GY.AE)	0	0	0	0	0	0	0	0	0	0.205166	0	0	0	0.218381	0	0	0.158591	0	0	0	0.346148	0	4		4		Sweet (SWEE); Musky (MUSK); Stinging (STGI); Soapy (SOAP);
Gynaecology (breast) (GY.BR)	0	-0.687721	0	0	0	0	0	0	0	0	0	0	0	0	0	0	0	0	0.369374	0	0	0	2	1	1	Smoky (SMOK);	Fresh/cooling (FRES);
Gynacology (other) (GY.OT)	0	0	0	0	0	0	0	0	0	0	0	0	0	0	0	0	0	0	0	0	0	0	0
Gynaecology (uterine conditions) (GY.UT)	0	0	0	0	0	0	0	0	0	0	0	0	0	0	0	-0.4701	0	0	0	0	0	0	1	1		Straw-like (STRW);
Gynaecology (vaginal discharge) (GY.VD)	0	0	0	0	0	0	0	-1.5943	0	0	0	0	0.495271	0	0	0	0	0	0	0	0	0	2	1	1	Burning/Hot (BURN);	Woody (WOOD);
Humoral management (HMM)	0	0	0.361463	0	0	-0.582183	0	0	0	0	0	0	0	0	0	0	0	0	0	0	0	0	2	1	1	Astringent (ASTR);	Bitter (BITT);
Libido regulators (LIBI)	0	0	0	0.670304	0	0	0	0	0	-0.506906	0	0	0	0	0.467716	0	0	0	0	0	0	0	3	1	2	Sweet (SWEE);	Starchy (STAR); Nutty (NUTT);
Mouth (mouth, teeth gums) (MOUTH)	0	0.711383	0	0.486208	0	0	0	0.404389	0	0.31831	0	0.606928	0	0	0	0	0	0	0	0	0	0	5		5		Smoky (SMOK); Starchy (STAR); Burning/Hot (BURN); Sweet (SWEE); Fruity (FRUI);
Musculoskeletal (external) (MU.EX)	0	0	0	0.580493	0	0.516063	0	0	0	0	-0.304117	0	0	0	0	0	0	0	0	0	0	0	3	1	2	Herby/Leafy (HERB);	Starchy (STAR); Astringent (ASTR);
Musculoskeletal (internal) (MU.IN)	0	0	0	0	0	0	0	0.57242	0	0	0	0	0	0	0	0	0	0	0	0	0	0	1	1			Burning/Hot (BURN);
Neurological (pain) (NS.PA)	-0.264148	0	0	0	0.189587	0	0	0	0	0.191755	0	0	0	0	0	0	0	0	0.304224	-0.309497	0	0	5	2	3	Sour/Acidic (SOUR); Salty (SALT);	Aromatic (AROM); Sweet (SWEE); Fresh/cooling (FRES);
Neurological (psychiatric disorders) (NS.PS)	0	0	0	0	0	0	0	0.462639	0	0.347181	0	0	0	0	0	0	0	0	0	0	0.418986	0	3		3		Burning/Hot (BURN); Sweet (SWEE); Soapy (SOAP);
Neurological (sciatica) (NS.SC)	-0.500747	0	0.43887	0	0.274731	0	0	0	0	0	0	0	0	0	0	0	0	0	0	0	0	0	3	1	2	Sour/Acidic (SOUR);	Bitter (BITT); Aromatic (AROM);
Neurological (various incl. epilepsy) (NS.VA)	-0.766788	0	0	0	0	0	0	0.31718	0	0	0	0	0.283679	0	0	0	0	0.287332	0	0	0	0	4	1	3	Sour/Acidic (SOUR);	Burning/Hot (BURN); Woody (WOOD); Stinky (STNK);
Nose (NOSE)	0	0	0	0.956924	0.273939	0	0	0	0	0	0	0	0	0	0	0	0	0	0	0	0	0	2		2		Starchy (STAR); Aromatic (AROM);
Parasites (PARA)	0	0	0	0.458442	0	0	0	0	0	0	0	-0.388686	0	0	0	0	0	0	0	0	0	0	2	1	1	Fruity (FRUI);	Starchy (STAR);
Poisons (POIS)	0	0	0	0	0.329924	0	0	0	0	0.465074	0	0	0	0	0	0	0	0	0	-0.414994	0.435062	0	4	1	3	Salty (SALT);	Aromatic (AROM); Sweet (SWEE); Soapy (SOAP);
Repellents (REPE)	0	0	0	0	0	0	0.354679	0	0	0	0	0	0	0	0	0	0	0	0	0	0.296419	0	2		2		Balsamic (BALS); Soapy (SOAP);
Respiratory (cough) (RE.CO)	-0.236012	0	0	0.355671	0	-0.339642	0	0	0	0.295763	0	0	0	0.351685	-0.265172	0	0	0	0	0	0	0	6	3	3	Sour/Acidic (SOUR); Astringent (ASTR); Nutty (NUTT);	Starchy (STAR); Sweet (SWEE); Musky (MUSK);
Respiratory (breathing difficulties) (RE.BD)	0	0	0.236505	0	0	0	0.265066	0	0	0	0	0	-0.443517	0.251234	0	0	0.256797	0	0.316233	0	0	0	6	1	5	Woody (WOOD);	Bitter (BITT); Balsamic (BALS); Musky (MUSK); Stinging (STGI); Fresh/cooling (FRES);
Respiratory (other) (RE.CO)	-0.347814	0	0.323908	0	0	0	0	0	0	0.339447	0	0	0	0.459884	0.626076	0	0	0	0	0	0	0	5	1	4	Sour/Acidic (SOUR);	Bitter (BITT); Sweet (SWEE); Musky (MUSK); Nutty (NUTT);
Skin (animal bites) (SK.AB)	-0.411007	0	0	0.618318	0	0	0	0	0	0	0	0	0	0	0.750669	0	0	0	0	0	0	0	3	1	2	Sour/Acidic (SOUR);	Starchy (STAR); Nutty (NUTT);
Skin (cosmetics) (SK.CO)	-0.376506	0	0.13652	0	0	0.197094	0	0	0	0	0	0	0	0.286373	0	0	0	0	0	0	0.277715	0	5	1	4	Sour/Acidic (SOUR);	Bitter (BITT); Astringent (ASTR); Musky (MUSK); Soapy (SOAP);
Skin (infections) (SK.IF)	-0.365287	0	0.190137	0.267789	0	0	0	0	0	0	0	0	0	0	0.286271	0	0	0	0	-0.18069	0	0	5	2	3	Sour/Acidic (SOUR); Salty (SALT);	Bitter (BITT); Starchy (STAR); Nutty (NUTT);
Skin (inflammation) (SK.IN)	0	0	0	0	0	0	0	0	0	0	0	0	-0.320516	0.225428	0	0	0	0	0	0.174814	0	0.341089	4	1	3	Woody (WOOD);	Musky (MUSK); Salty (SALT); Mucilaginous (MUCI);
Skin (other) (SK.OT)	0	0	0	0.300287	0	0	0	0	0	0	0	0	0	0.280382	0	-0.339445	0	0	0	0	0	0	3	1	2	Straw-like (STRW);	Starchy (STAR); Musky (MUSK);
Skin (topical ulcers) (SK.UL)	0	0	0	0.438455	0	0	0	0	0	0.215081	0	0	-0.204281	0	0	0	0	0	0	0	0	0	3	1	2	Woody (WOOD);	Starchy (STAR); Sweet (SWEE);
Skin (wounds) (SK.WO)	0	-1.05791	0	0	0	0	0	0	0	0	0	0	0	0	0.515104	0	0	0	0	0	0.33272	0	3	1	2	Smoky (SMOK);	Nutty (NUTT); Soapy (SOAP);
Spleen (SPLE)	0	0	0	0	0	0	0	0	0	0	0	0.642587	0	0	0	0	0	0	0	0	0	0	1		1		Fruity (FRUI);
Urinary (calculus) (UR.CA)	0	0	0	0	0	-0.503343	0	0	0	0.438741	0	0	0	0	0	0	0	0	0	0	0	0	2	1	1	Astringent (ASTR);	Sweet (SWEE);
Urinary (diuretics) (UR.DI)	0	0	0	0	0	0	0	0	0	0	-0.137864	0	0	0	0	0	0	0	0	-0.171798	0.268109	0	3	2	1	Herby/Leafy (HERB); Salty (SALT);	Soapy (SOAP);
Urinary (other) (UR.OT)	-0.35451	0	0	0	0	-0.515435	0	0.332672	0	0.411722	0	0	0	0	0	0	0	0	0	0	0.380022	0	5	2	3	Sour/Acidic (SOUR); Astringent (ASTR);	Burning/Hot (BURN); Sweet (SWEE); Soapy (SOAP);
Various uses (VAR)	0	0	0	0	0	0	0	0	0	-0.571539	0	0	0	0	-0.551823	-1.04971	0	0	0	0	0.349323	0	4	3	1	Sweet (SWEE); Nutty (NUTT); Straw-like (STRW);	Soapy (SOAP);
Vascular (haemorrhoids & varices) (VASC)	0	0	0	-1.71285	0	0	0	0.68543	0	0	0	0	0	0	0	0	0	0	0	0	0	0	2	1	1	Starchy (STAR);	Burning/Hot (BURN);
	-4.46773	-30.9942	2.24909	4.31407	1.35128	-1.5473	0.619745	2.84897	0	2.83191	-0.699433	0.559256	-0.792191	2.67015	2.22415	-2.56144	0.228799	0.287332	0.989831	0.335831	4.21831	0.341089	149	50	99
Heat map showing the strength of the association between chemosensory quality and therapeutic use. Parameters estimated from our binary response models estimating the statistical phylogenetic relationship between strength of each of the 22 chemosensory qualities and whether a drug is used for any individual therapeutic purpose are shown for significant parameters only. All other variables are zer…
